# Supplementary material for: Exercise type, training load, velocity loss threshold, and sets affect the relationship between lifting velocity and perceived repetitions in reserve in strength-trained individuals
Source: PeerJ. 2025 Aug 15;13:e19797. doi: 10.7717/peerj.19797 (PMC12360324; doi:10.7717/peerj.19797)
Supplement: Supplemental Information 1 [file peerj-13-19797-s001.xlsx]

## Sheet: Sheet1
Velocity group	week	day	set	Perceived reps in reserve [pRIR]	Velocity loss [%]	Mean velocity [ms$^{-1}$]	RPS	Exercise	height_cm	mass_kg	age	Female	Rounds	id
Low pre-set velocity loss	1	Bench press: 0.45 ms$^{-1}$; Squat: 0.60 ms$^{-1}$	1	2	22.9167	0.27	5	Bench press	159.5	49.5	20	1	1	1
Low pre-set velocity loss	1	Bench press: 0.45 ms$^{-1}$; Squat: 0.60 ms$^{-1}$	2	1	43.75	0.36	5	Bench press	159.5	49.5	20	1	1	1
Low pre-set velocity loss	1	Bench press: 0.38 ms$^{-1}$; Squat: 0.49 ms$^{-1}$	1	2	27.5	0.31	3	Bench press	159.5	49.5	20	1	1	1
Low pre-set velocity loss	1	Bench press: 0.38 ms$^{-1}$; Squat: 0.49 ms$^{-1}$	2	1	22.5	0.28	2	Bench press	159.5	49.5	20	1	1	1
Low pre-set velocity loss	1	Bench press: 0.53 ms$^{-1}$; Squat: 0.70 ms$^{-1}$	1	2	29.6296	0.32	5	Bench press	159.5	49.5	20	1	1	1
Low pre-set velocity loss	1	Bench press: 0.53 ms$^{-1}$; Squat: 0.70 ms$^{-1}$	2	2	40.7407	0.36	6	Bench press	159.5	49.5	20	1	1	1
Low pre-set velocity loss	1	Bench press: 0.53 ms$^{-1}$; Squat: 0.70 ms$^{-1}$	3	2	33.3333	0.38	6	Bench press	159.5	49.5	20	1	1	1
Low pre-set velocity loss	2	Bench press: 0.45 ms$^{-1}$; Squat: 0.60 ms$^{-1}$	1	2	35.4167	0.31	2	Bench press	159.5	49.5	20	1	1	1
Low pre-set velocity loss	2	Bench press: 0.45 ms$^{-1}$; Squat: 0.60 ms$^{-1}$	3	2	50	0.38	4	Bench press	159.5	49.5	20	1	1	1
Low pre-set velocity loss	2	Bench press: 0.45 ms$^{-1}$; Squat: 0.60 ms$^{-1}$	4	1	20.8333	0.35	3	Bench press	159.5	49.5	20	1	1	1
Low pre-set velocity loss	2	Bench press: 0.45 ms$^{-1}$; Squat: 0.60 ms$^{-1}$	5	2	27.0833	0.36	2	Bench press	159.5	49.5	20	1	1	1
Low pre-set velocity loss	2	Bench press: 0.45 ms$^{-1}$; Squat: 0.60 ms$^{-1}$	6	1	25	0.4	2	Bench press	159.5	49.5	20	1	1	1
Low pre-set velocity loss	2	Bench press: 0.38 ms$^{-1}$; Squat: 0.49 ms$^{-1}$	1	2	39.0244	0.24	2	Bench press	159.5	49.5	20	1	1	1
Low pre-set velocity loss	2	Bench press: 0.38 ms$^{-1}$; Squat: 0.49 ms$^{-1}$	2	2	41.4634	0.26	3	Bench press	159.5	49.5	20	1	1	1
Low pre-set velocity loss	2	Bench press: 0.38 ms$^{-1}$; Squat: 0.49 ms$^{-1}$	3	2	36.5854	0.29	2	Bench press	159.5	49.5	20	1	1	1
Low pre-set velocity loss	2	Bench press: 0.38 ms$^{-1}$; Squat: 0.49 ms$^{-1}$	5	1	36.5854	0.36	2	Bench press	159.5	49.5	20	1	1	1
Low pre-set velocity loss	2	Bench press: 0.38 ms$^{-1}$; Squat: 0.49 ms$^{-1}$	6	1	12.1951	0.29	1	Bench press	159.5	49.5	20	1	1	1
Low pre-set velocity loss	2	Bench press: 0.38 ms$^{-1}$; Squat: 0.49 ms$^{-1}$	7	1	29.2683	0.23	2	Bench press	159.5	49.5	20	1	1	1
Low pre-set velocity loss	2	Bench press: 0.38 ms$^{-1}$; Squat: 0.49 ms$^{-1}$	8	1	43.9024	0.28	1	Bench press	159.5	49.5	20	1	1	1
Low pre-set velocity loss	2	Bench press: 0.53 ms$^{-1}$; Squat: 0.70 ms$^{-1}$	1	2	41.0714	0.38	5	Bench press	159.5	49.5	20	1	1	1
Low pre-set velocity loss	2	Bench press: 0.53 ms$^{-1}$; Squat: 0.70 ms$^{-1}$	2	1	32.1429	0.45	4	Bench press	159.5	49.5	20	1	1	1
Low pre-set velocity loss	2	Bench press: 0.53 ms$^{-1}$; Squat: 0.70 ms$^{-1}$	3	1	19.6429	0.36	3	Bench press	159.5	49.5	20	1	1	1
Low pre-set velocity loss	2	Bench press: 0.53 ms$^{-1}$; Squat: 0.70 ms$^{-1}$	4	1	35.7143	0.26	4	Bench press	159.5	49.5	20	1	1	1
Low pre-set velocity loss	2	Bench press: 0.53 ms$^{-1}$; Squat: 0.70 ms$^{-1}$	5	1	53.5714	0.39	3	Bench press	159.5	49.5	20	1	1	1
Low pre-set velocity loss	2	Bench press: 0.53 ms$^{-1}$; Squat: 0.70 ms$^{-1}$	6	1	30.3571	0.44	3	Bench press	159.5	49.5	20	1	1	1
Low pre-set velocity loss	2	Bench press: 0.53 ms$^{-1}$; Squat: 0.70 ms$^{-1}$	7	1	21.4286	0.41	2	Bench press	159.5	49.5	20	1	1	1
Low pre-set velocity loss	3	Bench press: 0.38 ms$^{-1}$; Squat: 0.49 ms$^{-1}$	1	1	41.0256	0.24	2	Bench press	159.5	49.5	20	1	1	1
Low pre-set velocity loss	3	Bench press: 0.38 ms$^{-1}$; Squat: 0.49 ms$^{-1}$	2	1	38.4615	0.33	2	Bench press	159.5	49.5	20	1	1	1
Low pre-set velocity loss	3	Bench press: 0.38 ms$^{-1}$; Squat: 0.49 ms$^{-1}$	3	1	15.3846	0.29	1	Bench press	159.5	49.5	20	1	1	1
Low pre-set velocity loss	3	Bench press: 0.38 ms$^{-1}$; Squat: 0.49 ms$^{-1}$	4	1	25.641	0.22	2	Bench press	159.5	49.5	20	1	1	1
Low pre-set velocity loss	3	Bench press: 0.38 ms$^{-1}$; Squat: 0.49 ms$^{-1}$	5	0	43.5897	0.25	2	Bench press	159.5	49.5	20	1	1	1
Low pre-set velocity loss	3	Bench press: 0.38 ms$^{-1}$; Squat: 0.49 ms$^{-1}$	6	0	35.8974	0.29	2	Bench press	159.5	49.5	20	1	1	1
Low pre-set velocity loss	3	Bench press: 0.38 ms$^{-1}$; Squat: 0.49 ms$^{-1}$	7	0	25.641	0.3	1	Bench press	159.5	49.5	20	1	1	1
Low pre-set velocity loss	3	Bench press: 0.38 ms$^{-1}$; Squat: 0.49 ms$^{-1}$	8	1	23.0769	0.35	1	Bench press	159.5	49.5	20	1	1	1
Low pre-set velocity loss	3	Bench press: 0.53 ms$^{-1}$; Squat: 0.70 ms$^{-1}$	1	2	43.3962	0.35	4	Bench press	159.5	49.5	20	1	1	1
Low pre-set velocity loss	3	Bench press: 0.53 ms$^{-1}$; Squat: 0.70 ms$^{-1}$	2	2	33.9623	0.31	5	Bench press	159.5	49.5	20	1	1	1
Low pre-set velocity loss	3	Bench press: 0.53 ms$^{-1}$; Squat: 0.70 ms$^{-1}$	3	1	41.5094	0.35	4	Bench press	159.5	49.5	20	1	1	1
Low pre-set velocity loss	3	Bench press: 0.53 ms$^{-1}$; Squat: 0.70 ms$^{-1}$	4	1	33.9623	0.37	4	Bench press	159.5	49.5	20	1	1	1
Low pre-set velocity loss	3	Bench press: 0.53 ms$^{-1}$; Squat: 0.70 ms$^{-1}$	5	2	30.1887	0.34	3	Bench press	159.5	49.5	20	1	1	1
Low pre-set velocity loss	3	Bench press: 0.53 ms$^{-1}$; Squat: 0.70 ms$^{-1}$	6	1	35.8491	0.37	4	Bench press	159.5	49.5	20	1	1	1
Low pre-set velocity loss	4	Bench press: 0.45 ms$^{-1}$; Squat: 0.60 ms$^{-1}$	1	3	35.5556	0.36	4	Bench press	159.5	49.5	20	1	1	1
Low pre-set velocity loss	4	Bench press: 0.45 ms$^{-1}$; Squat: 0.60 ms$^{-1}$	2	2	20	0.36	3	Bench press	159.5	49.5	20	1	1	1
Low pre-set velocity loss	4	Bench press: 0.45 ms$^{-1}$; Squat: 0.60 ms$^{-1}$	3	2	20	0.26	3	Bench press	159.5	49.5	20	1	1	1
Low pre-set velocity loss	4	Bench press: 0.45 ms$^{-1}$; Squat: 0.60 ms$^{-1}$	4	1	42.2222	0.39	3	Bench press	159.5	49.5	20	1	1	1
Low pre-set velocity loss	4	Bench press: 0.45 ms$^{-1}$; Squat: 0.60 ms$^{-1}$	5	1	13.3333	0.37	3	Bench press	159.5	49.5	20	1	1	1
Low pre-set velocity loss	4	Bench press: 0.45 ms$^{-1}$; Squat: 0.60 ms$^{-1}$	6	2	17.7778	0.3	3	Bench press	159.5	49.5	20	1	1	1
Low pre-set velocity loss	4	Bench press: 0.38 ms$^{-1}$; Squat: 0.49 ms$^{-1}$	1	2	24.3243	0.3	1	Bench press	159.5	49.5	20	1	1	1
Low pre-set velocity loss	4	Bench press: 0.38 ms$^{-1}$; Squat: 0.49 ms$^{-1}$	2	0	18.9189	0.25	1	Bench press	159.5	49.5	20	1	1	1
Low pre-set velocity loss	4	Bench press: 0.38 ms$^{-1}$; Squat: 0.49 ms$^{-1}$	3	1	32.4324	0.28	1	Bench press	159.5	49.5	20	1	1	1
Low pre-set velocity loss	4	Bench press: 0.38 ms$^{-1}$; Squat: 0.49 ms$^{-1}$	4	1	24.3243	0.27	1	Bench press	159.5	49.5	20	1	1	1
Low pre-set velocity loss	4	Bench press: 0.38 ms$^{-1}$; Squat: 0.49 ms$^{-1}$	5	0	27.027	0.24	1	Bench press	159.5	49.5	20	1	1	1
Low pre-set velocity loss	4	Bench press: 0.38 ms$^{-1}$; Squat: 0.49 ms$^{-1}$	6	1	35.1351	0.28	1	Bench press	159.5	49.5	20	1	1	1
Low pre-set velocity loss	4	Bench press: 0.38 ms$^{-1}$; Squat: 0.49 ms$^{-1}$	7	1	24.3243	0.25	1	Bench press	159.5	49.5	20	1	1	1
Low pre-set velocity loss	4	Bench press: 0.38 ms$^{-1}$; Squat: 0.49 ms$^{-1}$	8	1	32.4324	0.19	1	Bench press	159.5	49.5	20	1	1	1
Low pre-set velocity loss	4	Bench press: 0.38 ms$^{-1}$; Squat: 0.49 ms$^{-1}$	9	1	48.6486	0.28	1	Bench press	159.5	49.5	20	1	1	1
Low pre-set velocity loss	4	Bench press: 0.53 ms$^{-1}$; Squat: 0.70 ms$^{-1}$	1	2	35.0877	0.39	4	Bench press	159.5	49.5	20	1	1	1
Low pre-set velocity loss	4	Bench press: 0.53 ms$^{-1}$; Squat: 0.70 ms$^{-1}$	2	2	31.5789	0.34	4	Bench press	159.5	49.5	20	1	1	1
Low pre-set velocity loss	4	Bench press: 0.53 ms$^{-1}$; Squat: 0.70 ms$^{-1}$	3	1	40.3509	0.3	4	Bench press	159.5	49.5	20	1	1	1
Low pre-set velocity loss	4	Bench press: 0.53 ms$^{-1}$; Squat: 0.70 ms$^{-1}$	4	1	47.3684	0.45	4	Bench press	159.5	49.5	20	1	1	1
Low pre-set velocity loss	4	Bench press: 0.53 ms$^{-1}$; Squat: 0.70 ms$^{-1}$	5	1	21.0526	0.41	2	Bench press	159.5	49.5	20	1	1	1
Low pre-set velocity loss	4	Bench press: 0.53 ms$^{-1}$; Squat: 0.70 ms$^{-1}$	6	1	28.0702	0.37	3	Bench press	159.5	49.5	20	1	1	1
Low pre-set velocity loss	5	Bench press: 0.45 ms$^{-1}$; Squat: 0.60 ms$^{-1}$	1	2	30.2326	0.27	4	Bench press	159.5	49.5	20	1	1	1
Low pre-set velocity loss	5	Bench press: 0.45 ms$^{-1}$; Squat: 0.60 ms$^{-1}$	2	2	37.2093	0.27	4	Bench press	159.5	49.5	20	1	1	1
Low pre-set velocity loss	5	Bench press: 0.45 ms$^{-1}$; Squat: 0.60 ms$^{-1}$	3	2	37.2093	0.4	4	Bench press	159.5	49.5	20	1	1	1
Low pre-set velocity loss	5	Bench press: 0.45 ms$^{-1}$; Squat: 0.60 ms$^{-1}$	4	2	6.97674	0.26	2	Bench press	159.5	49.5	20	1	1	1
Low pre-set velocity loss	5	Bench press: 0.45 ms$^{-1}$; Squat: 0.60 ms$^{-1}$	5	1	39.5349	0.22	4	Bench press	159.5	49.5	20	1	1	1
Low pre-set velocity loss	5	Bench press: 0.38 ms$^{-1}$; Squat: 0.49 ms$^{-1}$	1	1	33.3333	0.28	2	Bench press	159.5	49.5	20	1	1	1
Low pre-set velocity loss	5	Bench press: 0.38 ms$^{-1}$; Squat: 0.49 ms$^{-1}$	2	2	33.3333	0.3	4	Bench press	159.5	49.5	20	1	1	1
Low pre-set velocity loss	5	Bench press: 0.38 ms$^{-1}$; Squat: 0.49 ms$^{-1}$	3	1	28.5714	0.17	2	Bench press	159.5	49.5	20	1	1	1
Low pre-set velocity loss	5	Bench press: 0.38 ms$^{-1}$; Squat: 0.49 ms$^{-1}$	4	0	59.5238	0.23	3	Bench press	159.5	49.5	20	1	1	1
Low pre-set velocity loss	5	Bench press: 0.38 ms$^{-1}$; Squat: 0.49 ms$^{-1}$	5	1	45.2381	0.35	2	Bench press	159.5	49.5	20	1	1	1
Low pre-set velocity loss	5	Bench press: 0.38 ms$^{-1}$; Squat: 0.49 ms$^{-1}$	6	1	16.6667	0.36	1	Bench press	159.5	49.5	20	1	1	1
Low pre-set velocity loss	5	Bench press: 0.38 ms$^{-1}$; Squat: 0.49 ms$^{-1}$	7	1	14.2857	0.31	1	Bench press	159.5	49.5	20	1	1	1
Low pre-set velocity loss	5	Bench press: 0.53 ms$^{-1}$; Squat: 0.70 ms$^{-1}$	1	2	32	0.3	4	Bench press	159.5	49.5	20	1	1	1
Low pre-set velocity loss	5	Bench press: 0.53 ms$^{-1}$; Squat: 0.70 ms$^{-1}$	2	2	40	0.34	4	Bench press	159.5	49.5	20	1	1	1
Low pre-set velocity loss	5	Bench press: 0.53 ms$^{-1}$; Squat: 0.70 ms$^{-1}$	3	2	32	0.38	3	Bench press	159.5	49.5	20	1	1	1
Low pre-set velocity loss	5	Bench press: 0.53 ms$^{-1}$; Squat: 0.70 ms$^{-1}$	4	2	24	0.39	3	Bench press	159.5	49.5	20	1	1	1
Low pre-set velocity loss	5	Bench press: 0.53 ms$^{-1}$; Squat: 0.70 ms$^{-1}$	5	2	22	0.43	3	Bench press	159.5	49.5	20	1	1	1
Low pre-set velocity loss	5	Bench press: 0.53 ms$^{-1}$; Squat: 0.70 ms$^{-1}$	6	2	14	0.33	3	Bench press	159.5	49.5	20	1	1	1
Low pre-set velocity loss	5	Bench press: 0.53 ms$^{-1}$; Squat: 0.70 ms$^{-1}$	7	1	34	0.26	4	Bench press	159.5	49.5	20	1	1	1
Low pre-set velocity loss	6	Bench press: 0.45 ms$^{-1}$; Squat: 0.60 ms$^{-1}$	1	2	33.3333	0.35	3	Bench press	159.5	49.5	20	1	1	1
Low pre-set velocity loss	6	Bench press: 0.45 ms$^{-1}$; Squat: 0.60 ms$^{-1}$	2	2	22.2222	0.29	3	Bench press	159.5	49.5	20	1	1	1
Low pre-set velocity loss	6	Bench press: 0.45 ms$^{-1}$; Squat: 0.60 ms$^{-1}$	3	1	35.5556	0.27	3	Bench press	159.5	49.5	20	1	1	1
Low pre-set velocity loss	6	Bench press: 0.45 ms$^{-1}$; Squat: 0.60 ms$^{-1}$	4	2	40	0.33	3	Bench press	159.5	49.5	20	1	1	1
Low pre-set velocity loss	6	Bench press: 0.45 ms$^{-1}$; Squat: 0.60 ms$^{-1}$	5	1	26.6667	0.29	2	Bench press	159.5	49.5	20	1	1	1
Low pre-set velocity loss	6	Bench press: 0.45 ms$^{-1}$; Squat: 0.60 ms$^{-1}$	6	2	35.5556	0.24	2	Bench press	159.5	49.5	20	1	1	1
Low pre-set velocity loss	6	Bench press: 0.45 ms$^{-1}$; Squat: 0.60 ms$^{-1}$	7	1	46.6667	0.37	2	Bench press	159.5	49.5	20	1	1	1
Low pre-set velocity loss	6	Bench press: 0.45 ms$^{-1}$; Squat: 0.60 ms$^{-1}$	8	1	17.7778	0.36	1	Bench press	159.5	49.5	20	1	1	1
Low pre-set velocity loss	6	Bench press: 0.45 ms$^{-1}$; Squat: 0.60 ms$^{-1}$	9	1	20	0.31	2	Bench press	159.5	49.5	20	1	1	1
Low pre-set velocity loss	6	Bench press: 0.38 ms$^{-1}$; Squat: 0.49 ms$^{-1}$	1	1	35.1351	0.25	2	Bench press	159.5	49.5	20	1	1	1
Low pre-set velocity loss	6	Bench press: 0.38 ms$^{-1}$; Squat: 0.49 ms$^{-1}$	2	1	32.4324	0.26	2	Bench press	159.5	49.5	20	1	1	1
Low pre-set velocity loss	6	Bench press: 0.38 ms$^{-1}$; Squat: 0.49 ms$^{-1}$	3	1	29.7297	0.32	2	Bench press	159.5	49.5	20	1	1	1
Low pre-set velocity loss	6	Bench press: 0.38 ms$^{-1}$; Squat: 0.49 ms$^{-1}$	4	1	13.5135	0.24	2	Bench press	159.5	49.5	20	1	1	1
Low pre-set velocity loss	6	Bench press: 0.38 ms$^{-1}$; Squat: 0.49 ms$^{-1}$	5	0	35.1351	0.24	2	Bench press	159.5	49.5	20	1	1	1
Low pre-set velocity loss	6	Bench press: 0.38 ms$^{-1}$; Squat: 0.49 ms$^{-1}$	6	0	35.1351	0.24	2	Bench press	159.5	49.5	20	1	1	1
Low pre-set velocity loss	6	Bench press: 0.38 ms$^{-1}$; Squat: 0.49 ms$^{-1}$	7	1	35.1351	0.2	2	Bench press	159.5	49.5	20	1	1	1
Low pre-set velocity loss	6	Bench press: 0.38 ms$^{-1}$; Squat: 0.49 ms$^{-1}$	8	0	45.9459	0.35	2	Bench press	159.5	49.5	20	1	1	1
Low pre-set velocity loss	6	Bench press: 0.53 ms$^{-1}$; Squat: 0.70 ms$^{-1}$	1	2	16.6667	0.38	3	Bench press	159.5	49.5	20	1	1	1
Low pre-set velocity loss	6	Bench press: 0.53 ms$^{-1}$; Squat: 0.70 ms$^{-1}$	2	2	29.6296	0.36	4	Bench press	159.5	49.5	20	1	1	1
Low pre-set velocity loss	6	Bench press: 0.53 ms$^{-1}$; Squat: 0.70 ms$^{-1}$	3	2	33.3333	0.36	4	Bench press	159.5	49.5	20	1	1	1
Low pre-set velocity loss	6	Bench press: 0.53 ms$^{-1}$; Squat: 0.70 ms$^{-1}$	4	2	33.3333	0.33	4	Bench press	159.5	49.5	20	1	1	1
Low pre-set velocity loss	6	Bench press: 0.53 ms$^{-1}$; Squat: 0.70 ms$^{-1}$	5	2	38.8889	0.4	4	Bench press	159.5	49.5	20	1	1	1
Low pre-set velocity loss	6	Bench press: 0.53 ms$^{-1}$; Squat: 0.70 ms$^{-1}$	6	2	25.9259	0.4	5	Bench press	159.5	49.5	20	1	1	1
Low pre-set velocity loss	6	Bench press: 0.53 ms$^{-1}$; Squat: 0.70 ms$^{-1}$	7	2	25.9259	0.41	3	Bench press	159.5	49.5	20	1	1	1
Low pre-set velocity loss	1	Bench press: 0.45 ms$^{-1}$; Squat: 0.60 ms$^{-1}$	1	1	20.9677	0.49	2	Squat	159.5	49.5	20	1	1	1
Low pre-set velocity loss	1	Bench press: 0.45 ms$^{-1}$; Squat: 0.60 ms$^{-1}$	2	1	32.2581	0.42	3	Squat	159.5	49.5	20	1	1	1
Low pre-set velocity loss	1	Bench press: 0.45 ms$^{-1}$; Squat: 0.60 ms$^{-1}$	3	1	20.9677	0.49	2	Squat	159.5	49.5	20	1	1	1
Low pre-set velocity loss	1	Bench press: 0.45 ms$^{-1}$; Squat: 0.60 ms$^{-1}$	4	2	24.1935	0.47	1	Squat	159.5	49.5	20	1	1	1
Low pre-set velocity loss	1	Bench press: 0.45 ms$^{-1}$; Squat: 0.60 ms$^{-1}$	5	1	40.3226	0.37	2	Squat	159.5	49.5	20	1	1	1
Low pre-set velocity loss	1	Bench press: 0.45 ms$^{-1}$; Squat: 0.60 ms$^{-1}$	6	1	16.129	0.52	1	Squat	159.5	49.5	20	1	1	1
Low pre-set velocity loss	1	Bench press: 0.45 ms$^{-1}$; Squat: 0.60 ms$^{-1}$	7	2	20.9677	0.49	1	Squat	159.5	49.5	20	1	1	1
Low pre-set velocity loss	1	Bench press: 0.38 ms$^{-1}$; Squat: 0.49 ms$^{-1}$	1	2	10.2041	0.44	1	Squat	159.5	49.5	20	1	1	1
Low pre-set velocity loss	1	Bench press: 0.38 ms$^{-1}$; Squat: 0.49 ms$^{-1}$	2	2	30.6122	0.34	1	Squat	159.5	49.5	20	1	1	1
Low pre-set velocity loss	1	Bench press: 0.38 ms$^{-1}$; Squat: 0.49 ms$^{-1}$	3	2	20.4082	0.39	2	Squat	159.5	49.5	20	1	1	1
Low pre-set velocity loss	1	Bench press: 0.38 ms$^{-1}$; Squat: 0.49 ms$^{-1}$	4	1	40.8163	0.29	1	Squat	159.5	49.5	20	1	1	1
Low pre-set velocity loss	1	Bench press: 0.38 ms$^{-1}$; Squat: 0.49 ms$^{-1}$	5	1	28.5714	0.35	1	Squat	159.5	49.5	20	1	1	1
Low pre-set velocity loss	1	Bench press: 0.53 ms$^{-1}$; Squat: 0.70 ms$^{-1}$	1	1	25.3521	0.53	5	Squat	159.5	49.5	20	1	1	1
Low pre-set velocity loss	1	Bench press: 0.53 ms$^{-1}$; Squat: 0.70 ms$^{-1}$	2	1	18.3099	0.58	3	Squat	159.5	49.5	20	1	1	1
Low pre-set velocity loss	1	Bench press: 0.53 ms$^{-1}$; Squat: 0.70 ms$^{-1}$	3	1	18.3099	0.58	3	Squat	159.5	49.5	20	1	1	1
Low pre-set velocity loss	1	Bench press: 0.53 ms$^{-1}$; Squat: 0.70 ms$^{-1}$	4	2	30.9859	0.49	3	Squat	159.5	49.5	20	1	1	1
Low pre-set velocity loss	1	Bench press: 0.53 ms$^{-1}$; Squat: 0.70 ms$^{-1}$	5	2	16.9014	0.59	2	Squat	159.5	49.5	20	1	1	1
Low pre-set velocity loss	1	Bench press: 0.53 ms$^{-1}$; Squat: 0.70 ms$^{-1}$	6	1	19.7183	0.57	2	Squat	159.5	49.5	20	1	1	1
Low pre-set velocity loss	1	Bench press: 0.53 ms$^{-1}$; Squat: 0.70 ms$^{-1}$	8	2	12.6761	0.62	1	Squat	159.5	49.5	20	1	1	1
Low pre-set velocity loss	2	Bench press: 0.45 ms$^{-1}$; Squat: 0.60 ms$^{-1}$	1	1	30	0.42	2	Squat	159.5	49.5	20	1	1	1
Low pre-set velocity loss	2	Bench press: 0.45 ms$^{-1}$; Squat: 0.60 ms$^{-1}$	2	0	25	0.45	2	Squat	159.5	49.5	20	1	1	1
Low pre-set velocity loss	2	Bench press: 0.45 ms$^{-1}$; Squat: 0.60 ms$^{-1}$	3	0	31.6667	0.41	3	Squat	159.5	49.5	20	1	1	1
Low pre-set velocity loss	2	Bench press: 0.45 ms$^{-1}$; Squat: 0.60 ms$^{-1}$	4	0	18.3333	0.49	2	Squat	159.5	49.5	20	1	1	1
Low pre-set velocity loss	2	Bench press: 0.45 ms$^{-1}$; Squat: 0.60 ms$^{-1}$	5	0	23.3333	0.46	2	Squat	159.5	49.5	20	1	1	1
Low pre-set velocity loss	2	Bench press: 0.45 ms$^{-1}$; Squat: 0.60 ms$^{-1}$	6	0	20	0.48	1	Squat	159.5	49.5	20	1	1	1
Low pre-set velocity loss	2	Bench press: 0.38 ms$^{-1}$; Squat: 0.49 ms$^{-1}$	1	2	0	0.5	1	Squat	159.5	49.5	20	1	1	1
Low pre-set velocity loss	2	Bench press: 0.38 ms$^{-1}$; Squat: 0.49 ms$^{-1}$	2	1	18	0.41	1	Squat	159.5	49.5	20	1	1	1
Low pre-set velocity loss	2	Bench press: 0.38 ms$^{-1}$; Squat: 0.49 ms$^{-1}$	3	1	10	0.45	1	Squat	159.5	49.5	20	1	1	1
Low pre-set velocity loss	2	Bench press: 0.38 ms$^{-1}$; Squat: 0.49 ms$^{-1}$	5	1	6	0.47	1	Squat	159.5	49.5	20	1	1	1
Low pre-set velocity loss	2	Bench press: 0.38 ms$^{-1}$; Squat: 0.49 ms$^{-1}$	6	0	18	0.41	1	Squat	159.5	49.5	20	1	1	1
Low pre-set velocity loss	2	Bench press: 0.53 ms$^{-1}$; Squat: 0.70 ms$^{-1}$	1	2	33.3333	0.48	4	Squat	159.5	49.5	20	1	1	1
Low pre-set velocity loss	2	Bench press: 0.53 ms$^{-1}$; Squat: 0.70 ms$^{-1}$	2	2	20.8333	0.57	2	Squat	159.5	49.5	20	1	1	1
Low pre-set velocity loss	2	Bench press: 0.53 ms$^{-1}$; Squat: 0.70 ms$^{-1}$	3	2	22.2222	0.56	2	Squat	159.5	49.5	20	1	1	1
Low pre-set velocity loss	2	Bench press: 0.53 ms$^{-1}$; Squat: 0.70 ms$^{-1}$	4	1	23.6111	0.55	2	Squat	159.5	49.5	20	1	1	1
Low pre-set velocity loss	2	Bench press: 0.53 ms$^{-1}$; Squat: 0.70 ms$^{-1}$	5	1	29.1667	0.51	3	Squat	159.5	49.5	20	1	1	1
Low pre-set velocity loss	2	Bench press: 0.53 ms$^{-1}$; Squat: 0.70 ms$^{-1}$	6	1	23.6111	0.55	2	Squat	159.5	49.5	20	1	1	1
Low pre-set velocity loss	2	Bench press: 0.53 ms$^{-1}$; Squat: 0.70 ms$^{-1}$	7	1	31.9444	0.49	2	Squat	159.5	49.5	20	1	1	1
Low pre-set velocity loss	2	Bench press: 0.53 ms$^{-1}$; Squat: 0.70 ms$^{-1}$	8	1	45.8333	0.39	2	Squat	159.5	49.5	20	1	1	1
Low pre-set velocity loss	2	Bench press: 0.53 ms$^{-1}$; Squat: 0.70 ms$^{-1}$	9	1	26.3889	0.53	1	Squat	159.5	49.5	20	1	1	1
Low pre-set velocity loss	3	Bench press: 0.45 ms$^{-1}$; Squat: 0.60 ms$^{-1}$	1	1	26.5625	0.47	3	Squat	159.5	49.5	20	1	1	1
Low pre-set velocity loss	3	Bench press: 0.45 ms$^{-1}$; Squat: 0.60 ms$^{-1}$	2	1	32.8125	0.43	3	Squat	159.5	49.5	20	1	1	1
Low pre-set velocity loss	3	Bench press: 0.45 ms$^{-1}$; Squat: 0.60 ms$^{-1}$	3	1	21.875	0.5	2	Squat	159.5	49.5	20	1	1	1
Low pre-set velocity loss	3	Bench press: 0.45 ms$^{-1}$; Squat: 0.60 ms$^{-1}$	4	1	23.4375	0.49	2	Squat	159.5	49.5	20	1	1	1
Low pre-set velocity loss	3	Bench press: 0.45 ms$^{-1}$; Squat: 0.60 ms$^{-1}$	5	1	15.625	0.54	1	Squat	159.5	49.5	20	1	1	1
Low pre-set velocity loss	3	Bench press: 0.45 ms$^{-1}$; Squat: 0.60 ms$^{-1}$	6	1	32.8125	0.43	2	Squat	159.5	49.5	20	1	1	1
Low pre-set velocity loss	3	Bench press: 0.45 ms$^{-1}$; Squat: 0.60 ms$^{-1}$	7	1	20.3125	0.51	1	Squat	159.5	49.5	20	1	1	1
Low pre-set velocity loss	3	Bench press: 0.45 ms$^{-1}$; Squat: 0.60 ms$^{-1}$	8	1	29.6875	0.45	2	Squat	159.5	49.5	20	1	1	1
Low pre-set velocity loss	3	Bench press: 0.38 ms$^{-1}$; Squat: 0.49 ms$^{-1}$	1	3	14.5833	0.41	2	Squat	159.5	49.5	20	1	1	1
Low pre-set velocity loss	3	Bench press: 0.38 ms$^{-1}$; Squat: 0.49 ms$^{-1}$	2	2	18.75	0.39	1	Squat	159.5	49.5	20	1	1	1
Low pre-set velocity loss	3	Bench press: 0.38 ms$^{-1}$; Squat: 0.49 ms$^{-1}$	3	2	10.4167	0.43	1	Squat	159.5	49.5	20	1	1	1
Low pre-set velocity loss	3	Bench press: 0.38 ms$^{-1}$; Squat: 0.49 ms$^{-1}$	4	2	20.8333	0.38	1	Squat	159.5	49.5	20	1	1	1
Low pre-set velocity loss	3	Bench press: 0.38 ms$^{-1}$; Squat: 0.49 ms$^{-1}$	5	2	33.3333	0.32	2	Squat	159.5	49.5	20	1	1	1
Low pre-set velocity loss	3	Bench press: 0.38 ms$^{-1}$; Squat: 0.49 ms$^{-1}$	6	1	33.3333	0.32	1	Squat	159.5	49.5	20	1	1	1
Low pre-set velocity loss	3	Bench press: 0.38 ms$^{-1}$; Squat: 0.49 ms$^{-1}$	7	1	6.25	0.45	1	Squat	159.5	49.5	20	1	1	1
Low pre-set velocity loss	3	Bench press: 0.38 ms$^{-1}$; Squat: 0.49 ms$^{-1}$	8	1	6.25	0.45	1	Squat	159.5	49.5	20	1	1	1
Low pre-set velocity loss	3	Bench press: 0.38 ms$^{-1}$; Squat: 0.49 ms$^{-1}$	9	1	8.33333	0.44	1	Squat	159.5	49.5	20	1	1	1
Low pre-set velocity loss	3	Bench press: 0.38 ms$^{-1}$; Squat: 0.49 ms$^{-1}$	10	1	47.9167	0.25	1	Squat	159.5	49.5	20	1	1	1
Low pre-set velocity loss	3	Bench press: 0.38 ms$^{-1}$; Squat: 0.49 ms$^{-1}$	11	1	27.0833	0.35	1	Squat	159.5	49.5	20	1	1	1
Low pre-set velocity loss	3	Bench press: 0.53 ms$^{-1}$; Squat: 0.70 ms$^{-1}$	1	3	24.6575	0.55	5	Squat	159.5	49.5	20	1	1	1
Low pre-set velocity loss	3	Bench press: 0.53 ms$^{-1}$; Squat: 0.70 ms$^{-1}$	2	2	23.2877	0.56	4	Squat	159.5	49.5	20	1	1	1
Low pre-set velocity loss	3	Bench press: 0.53 ms$^{-1}$; Squat: 0.70 ms$^{-1}$	3	2	26.0274	0.54	3	Squat	159.5	49.5	20	1	1	1
Low pre-set velocity loss	3	Bench press: 0.53 ms$^{-1}$; Squat: 0.70 ms$^{-1}$	4	2	30.137	0.51	3	Squat	159.5	49.5	20	1	1	1
Low pre-set velocity loss	3	Bench press: 0.53 ms$^{-1}$; Squat: 0.70 ms$^{-1}$	5	1	19.1781	0.59	2	Squat	159.5	49.5	20	1	1	1
Low pre-set velocity loss	3	Bench press: 0.53 ms$^{-1}$; Squat: 0.70 ms$^{-1}$	6	3	24.6575	0.55	2	Squat	159.5	49.5	20	1	1	1
Low pre-set velocity loss	4	Bench press: 0.45 ms$^{-1}$; Squat: 0.60 ms$^{-1}$	1	1	19.3548	0.5	4	Squat	159.5	49.5	20	1	1	1
Low pre-set velocity loss	4	Bench press: 0.45 ms$^{-1}$; Squat: 0.60 ms$^{-1}$	2	0	37.0968	0.39	3	Squat	159.5	49.5	20	1	1	1
Low pre-set velocity loss	4	Bench press: 0.45 ms$^{-1}$; Squat: 0.60 ms$^{-1}$	3	1	19.3548	0.5	3	Squat	159.5	49.5	20	1	1	1
Low pre-set velocity loss	4	Bench press: 0.45 ms$^{-1}$; Squat: 0.60 ms$^{-1}$	4	0	19.3548	0.5	2	Squat	159.5	49.5	20	1	1	1
Low pre-set velocity loss	4	Bench press: 0.45 ms$^{-1}$; Squat: 0.60 ms$^{-1}$	5	0	6.45161	0.58	2	Squat	159.5	49.5	20	1	1	1
Low pre-set velocity loss	4	Bench press: 0.38 ms$^{-1}$; Squat: 0.49 ms$^{-1}$	1	3	28	0.36	2	Squat	159.5	49.5	20	1	1	1
Low pre-set velocity loss	4	Bench press: 0.38 ms$^{-1}$; Squat: 0.49 ms$^{-1}$	2	2	10	0.45	1	Squat	159.5	49.5	20	1	1	1
Low pre-set velocity loss	4	Bench press: 0.38 ms$^{-1}$; Squat: 0.49 ms$^{-1}$	3	2	18	0.41	1	Squat	159.5	49.5	20	1	1	1
Low pre-set velocity loss	4	Bench press: 0.38 ms$^{-1}$; Squat: 0.49 ms$^{-1}$	4	1	18	0.41	1	Squat	159.5	49.5	20	1	1	1
Low pre-set velocity loss	4	Bench press: 0.38 ms$^{-1}$; Squat: 0.49 ms$^{-1}$	5	1	30	0.35	1	Squat	159.5	49.5	20	1	1	1
Low pre-set velocity loss	4	Bench press: 0.38 ms$^{-1}$; Squat: 0.49 ms$^{-1}$	6	1	24	0.38	1	Squat	159.5	49.5	20	1	1	1
Low pre-set velocity loss	4	Bench press: 0.38 ms$^{-1}$; Squat: 0.49 ms$^{-1}$	7	1	28	0.36	1	Squat	159.5	49.5	20	1	1	1
Low pre-set velocity loss	4	Bench press: 0.38 ms$^{-1}$; Squat: 0.49 ms$^{-1}$	8	1	30	0.35	1	Squat	159.5	49.5	20	1	1	1
Low pre-set velocity loss	4	Bench press: 0.53 ms$^{-1}$; Squat: 0.70 ms$^{-1}$	1	2	30.6667	0.52	4	Squat	159.5	49.5	20	1	1	1
Low pre-set velocity loss	4	Bench press: 0.53 ms$^{-1}$; Squat: 0.70 ms$^{-1}$	2	2	28	0.54	3	Squat	159.5	49.5	20	1	1	1
Low pre-set velocity loss	4	Bench press: 0.53 ms$^{-1}$; Squat: 0.70 ms$^{-1}$	3	2	20	0.6	4	Squat	159.5	49.5	20	1	1	1
Low pre-set velocity loss	4	Bench press: 0.53 ms$^{-1}$; Squat: 0.70 ms$^{-1}$	4	2	29.3333	0.53	4	Squat	159.5	49.5	20	1	1	1
Low pre-set velocity loss	4	Bench press: 0.53 ms$^{-1}$; Squat: 0.70 ms$^{-1}$	5	1	30.6667	0.52	3	Squat	159.5	49.5	20	1	1	1
Low pre-set velocity loss	4	Bench press: 0.53 ms$^{-1}$; Squat: 0.70 ms$^{-1}$	6	1	20	0.6	2	Squat	159.5	49.5	20	1	1	1
Low pre-set velocity loss	4	Bench press: 0.53 ms$^{-1}$; Squat: 0.70 ms$^{-1}$	7	1	14.6667	0.64	2	Squat	159.5	49.5	20	1	1	1
Low pre-set velocity loss	4	Bench press: 0.53 ms$^{-1}$; Squat: 0.70 ms$^{-1}$	8	2	28	0.54	2	Squat	159.5	49.5	20	1	1	1
Low pre-set velocity loss	5	Bench press: 0.45 ms$^{-1}$; Squat: 0.60 ms$^{-1}$	1	1	31.746	0.43	4	Squat	159.5	49.5	20	1	1	1
Low pre-set velocity loss	5	Bench press: 0.45 ms$^{-1}$; Squat: 0.60 ms$^{-1}$	2	1	26.9841	0.46	3	Squat	159.5	49.5	20	1	1	1
Low pre-set velocity loss	5	Bench press: 0.45 ms$^{-1}$; Squat: 0.60 ms$^{-1}$	3	0	31.746	0.43	3	Squat	159.5	49.5	20	1	1	1
Low pre-set velocity loss	5	Bench press: 0.45 ms$^{-1}$; Squat: 0.60 ms$^{-1}$	4	1	25.3968	0.47	2	Squat	159.5	49.5	20	1	1	1
Low pre-set velocity loss	5	Bench press: 0.45 ms$^{-1}$; Squat: 0.60 ms$^{-1}$	5	1	20.6349	0.5	2	Squat	159.5	49.5	20	1	1	1
Low pre-set velocity loss	5	Bench press: 0.45 ms$^{-1}$; Squat: 0.60 ms$^{-1}$	6	1	15.873	0.53	2	Squat	159.5	49.5	20	1	1	1
Low pre-set velocity loss	5	Bench press: 0.45 ms$^{-1}$; Squat: 0.60 ms$^{-1}$	7	1	25.3968	0.47	2	Squat	159.5	49.5	20	1	1	1
Low pre-set velocity loss	5	Bench press: 0.45 ms$^{-1}$; Squat: 0.60 ms$^{-1}$	8	1	41.2698	0.37	2	Squat	159.5	49.5	20	1	1	1
Low pre-set velocity loss	5	Bench press: 0.38 ms$^{-1}$; Squat: 0.49 ms$^{-1}$	1	3	33.3333	0.36	3	Squat	159.5	49.5	20	1	1	1
Low pre-set velocity loss	5	Bench press: 0.38 ms$^{-1}$; Squat: 0.49 ms$^{-1}$	2	2	31.4815	0.37	2	Squat	159.5	49.5	20	1	1	1
Low pre-set velocity loss	5	Bench press: 0.38 ms$^{-1}$; Squat: 0.49 ms$^{-1}$	3	2	31.4815	0.37	2	Squat	159.5	49.5	20	1	1	1
Low pre-set velocity loss	5	Bench press: 0.38 ms$^{-1}$; Squat: 0.49 ms$^{-1}$	4	2	0	0.54	1	Squat	159.5	49.5	20	1	1	1
Low pre-set velocity loss	5	Bench press: 0.38 ms$^{-1}$; Squat: 0.49 ms$^{-1}$	5	2	11.1111	0.48	1	Squat	159.5	49.5	20	1	1	1
Low pre-set velocity loss	5	Bench press: 0.38 ms$^{-1}$; Squat: 0.49 ms$^{-1}$	6	2	14.8148	0.46	1	Squat	159.5	49.5	20	1	1	1
Low pre-set velocity loss	5	Bench press: 0.38 ms$^{-1}$; Squat: 0.49 ms$^{-1}$	7	2	25.9259	0.4	2	Squat	159.5	49.5	20	1	1	1
Low pre-set velocity loss	5	Bench press: 0.38 ms$^{-1}$; Squat: 0.49 ms$^{-1}$	8	2	22.2222	0.42	1	Squat	159.5	49.5	20	1	1	1
Low pre-set velocity loss	5	Bench press: 0.53 ms$^{-1}$; Squat: 0.70 ms$^{-1}$	1	2	18.9189	0.6	3	Squat	159.5	49.5	20	1	1	1
Low pre-set velocity loss	5	Bench press: 0.53 ms$^{-1}$; Squat: 0.70 ms$^{-1}$	2	2	14.8649	0.63	3	Squat	159.5	49.5	20	1	1	1
Low pre-set velocity loss	5	Bench press: 0.53 ms$^{-1}$; Squat: 0.70 ms$^{-1}$	3	1	20.2703	0.59	3	Squat	159.5	49.5	20	1	1	1
Low pre-set velocity loss	5	Bench press: 0.53 ms$^{-1}$; Squat: 0.70 ms$^{-1}$	5	1	20.2703	0.59	3	Squat	159.5	49.5	20	1	1	1
Low pre-set velocity loss	5	Bench press: 0.53 ms$^{-1}$; Squat: 0.70 ms$^{-1}$	6	1	18.9189	0.6	2	Squat	159.5	49.5	20	1	1	1
Low pre-set velocity loss	5	Bench press: 0.53 ms$^{-1}$; Squat: 0.70 ms$^{-1}$	7	1	28.3784	0.53	3	Squat	159.5	49.5	20	1	1	1
Low pre-set velocity loss	5	Bench press: 0.53 ms$^{-1}$; Squat: 0.70 ms$^{-1}$	8	2	29.7297	0.52	2	Squat	159.5	49.5	20	1	1	1
Low pre-set velocity loss	5	Bench press: 0.53 ms$^{-1}$; Squat: 0.70 ms$^{-1}$	9	1	24.3243	0.56	2	Squat	159.5	49.5	20	1	1	1
Low pre-set velocity loss	5	Bench press: 0.53 ms$^{-1}$; Squat: 0.70 ms$^{-1}$	10	1	24.3243	0.56	2	Squat	159.5	49.5	20	1	1	1
Low pre-set velocity loss	5	Bench press: 0.53 ms$^{-1}$; Squat: 0.70 ms$^{-1}$	11	1	17.5676	0.61	1	Squat	159.5	49.5	20	1	1	1
Low pre-set velocity loss	6	Bench press: 0.45 ms$^{-1}$; Squat: 0.60 ms$^{-1}$	1	1	18.9655	0.47	3	Squat	159.5	49.5	20	1	1	1
Low pre-set velocity loss	6	Bench press: 0.45 ms$^{-1}$; Squat: 0.60 ms$^{-1}$	2	1	15.5172	0.49	2	Squat	159.5	49.5	20	1	1	1
Low pre-set velocity loss	6	Bench press: 0.45 ms$^{-1}$; Squat: 0.60 ms$^{-1}$	3	0	13.7931	0.5	2	Squat	159.5	49.5	20	1	1	1
Low pre-set velocity loss	6	Bench press: 0.45 ms$^{-1}$; Squat: 0.60 ms$^{-1}$	4	1	18.9655	0.47	2	Squat	159.5	49.5	20	1	1	1
Low pre-set velocity loss	6	Bench press: 0.45 ms$^{-1}$; Squat: 0.60 ms$^{-1}$	5	1	24.1379	0.44	2	Squat	159.5	49.5	20	1	1	1
Low pre-set velocity loss	6	Bench press: 0.45 ms$^{-1}$; Squat: 0.60 ms$^{-1}$	6	1	18.9655	0.47	2	Squat	159.5	49.5	20	1	1	1
Low pre-set velocity loss	6	Bench press: 0.45 ms$^{-1}$; Squat: 0.60 ms$^{-1}$	7	0	15.5172	0.49	1	Squat	159.5	49.5	20	1	1	1
Low pre-set velocity loss	6	Bench press: 0.53 ms$^{-1}$; Squat: 0.70 ms$^{-1}$	2	2	16	0.63	4	Squat	159.5	49.5	20	1	1	1
Low pre-set velocity loss	6	Bench press: 0.53 ms$^{-1}$; Squat: 0.70 ms$^{-1}$	3	2	24	0.57	4	Squat	159.5	49.5	20	1	1	1
Low pre-set velocity loss	6	Bench press: 0.53 ms$^{-1}$; Squat: 0.70 ms$^{-1}$	4	2	20	0.6	4	Squat	159.5	49.5	20	1	1	1
Low pre-set velocity loss	6	Bench press: 0.53 ms$^{-1}$; Squat: 0.70 ms$^{-1}$	5	2	24	0.57	3	Squat	159.5	49.5	20	1	1	1
Low pre-set velocity loss	6	Bench press: 0.53 ms$^{-1}$; Squat: 0.70 ms$^{-1}$	6	2	22.6667	0.58	3	Squat	159.5	49.5	20	1	1	1
Low pre-set velocity loss	6	Bench press: 0.53 ms$^{-1}$; Squat: 0.70 ms$^{-1}$	7	2	20	0.6	2	Squat	159.5	49.5	20	1	1	1
Low pre-set velocity loss	6	Bench press: 0.53 ms$^{-1}$; Squat: 0.70 ms$^{-1}$	8	2	22.6667	0.58	3	Squat	159.5	49.5	20	1	1	1
Low pre-set velocity loss	6	Bench press: 0.53 ms$^{-1}$; Squat: 0.70 ms$^{-1}$	9	1	24	0.57	3	Squat	159.5	49.5	20	1	1	1
Low pre-set velocity loss	6	Bench press: 0.53 ms$^{-1}$; Squat: 0.70 ms$^{-1}$	10	1	20	0.6	2	Squat	159.5	49.5	20	1	1	1
High pre-set velocity loss	1	Bench press: 0.45 ms$^{-1}$; Squat: 0.60 ms$^{-1}$	1	2	55.5556	0.2	8	Bench press	165.4	82.6	28	0	1	2
High pre-set velocity loss	1	Bench press: 0.45 ms$^{-1}$; Squat: 0.60 ms$^{-1}$	2	1	68.8889	0.14	9	Bench press	165.4	82.6	28	0	1	2
High pre-set velocity loss	1	Bench press: 0.38 ms$^{-1}$; Squat: 0.49 ms$^{-1}$	1	3	55	0.18	7	Bench press	165.4	82.6	28	0	1	2
High pre-set velocity loss	1	Bench press: 0.38 ms$^{-1}$; Squat: 0.49 ms$^{-1}$	2	1	67.5	0.13	7	Bench press	165.4	82.6	28	0	1	2
High pre-set velocity loss	1	Bench press: 0.53 ms$^{-1}$; Squat: 0.70 ms$^{-1}$	1	3	58.8235	0.21	11	Bench press	165.4	82.6	28	0	1	2
High pre-set velocity loss	1	Bench press: 0.53 ms$^{-1}$; Squat: 0.70 ms$^{-1}$	2	2	68.6275	0.16	9	Bench press	165.4	82.6	28	0	1	2
High pre-set velocity loss	2	Bench press: 0.45 ms$^{-1}$; Squat: 0.60 ms$^{-1}$	1	3	62.5	0.18	14	Bench press	165.4	82.6	28	0	1	2
High pre-set velocity loss	2	Bench press: 0.45 ms$^{-1}$; Squat: 0.60 ms$^{-1}$	2	2	66.6667	0.16	11	Bench press	165.4	82.6	28	0	1	2
High pre-set velocity loss	2	Bench press: 0.45 ms$^{-1}$; Squat: 0.60 ms$^{-1}$	3	1	70.8333	0.14	9	Bench press	165.4	82.6	28	0	1	2
High pre-set velocity loss	2	Bench press: 0.38 ms$^{-1}$; Squat: 0.49 ms$^{-1}$	1	1	65.7895	0.13	9	Bench press	165.4	82.6	28	0	1	2
High pre-set velocity loss	2	Bench press: 0.38 ms$^{-1}$; Squat: 0.49 ms$^{-1}$	2	2	52.6316	0.18	8	Bench press	165.4	82.6	28	0	1	2
High pre-set velocity loss	2	Bench press: 0.38 ms$^{-1}$; Squat: 0.49 ms$^{-1}$	3	2	63.1579	0.14	6	Bench press	165.4	82.6	28	0	1	2
High pre-set velocity loss	2	Bench press: 0.53 ms$^{-1}$; Squat: 0.70 ms$^{-1}$	1	2	66.6667	0.17	13	Bench press	165.4	82.6	28	0	1	2
High pre-set velocity loss	2	Bench press: 0.53 ms$^{-1}$; Squat: 0.70 ms$^{-1}$	2	1	64.7059	0.18	13	Bench press	165.4	82.6	28	0	1	2
High pre-set velocity loss	2	Bench press: 0.53 ms$^{-1}$; Squat: 0.70 ms$^{-1}$	3	1	54.902	0.23	10	Bench press	165.4	82.6	28	0	1	2
High pre-set velocity loss	3	Bench press: 0.45 ms$^{-1}$; Squat: 0.60 ms$^{-1}$	1	0	68	0.16	13	Bench press	165.4	82.6	28	0	1	2
High pre-set velocity loss	3	Bench press: 0.45 ms$^{-1}$; Squat: 0.60 ms$^{-1}$	2	1	62	0.19	7	Bench press	165.4	82.6	28	0	1	2
High pre-set velocity loss	3	Bench press: 0.45 ms$^{-1}$; Squat: 0.60 ms$^{-1}$	3	2	42	0.29	7	Bench press	165.4	82.6	28	0	1	2
High pre-set velocity loss	3	Bench press: 0.38 ms$^{-1}$; Squat: 0.49 ms$^{-1}$	1	1	55.2632	0.17	9	Bench press	165.4	82.6	28	0	1	2
High pre-set velocity loss	3	Bench press: 0.38 ms$^{-1}$; Squat: 0.49 ms$^{-1}$	2	1	55.2632	0.17	7	Bench press	165.4	82.6	28	0	1	2
High pre-set velocity loss	3	Bench press: 0.38 ms$^{-1}$; Squat: 0.49 ms$^{-1}$	3	1	68.4211	0.12	8	Bench press	165.4	82.6	28	0	1	2
High pre-set velocity loss	3	Bench press: 0.53 ms$^{-1}$; Squat: 0.70 ms$^{-1}$	1	2	64	0.18	14	Bench press	165.4	82.6	28	0	1	2
High pre-set velocity loss	3	Bench press: 0.53 ms$^{-1}$; Squat: 0.70 ms$^{-1}$	2	1	74	0.13	9	Bench press	165.4	82.6	28	0	1	2
High pre-set velocity loss	3	Bench press: 0.53 ms$^{-1}$; Squat: 0.70 ms$^{-1}$	3	1	66	0.17	9	Bench press	165.4	82.6	28	0	1	2
High pre-set velocity loss	4	Bench press: 0.45 ms$^{-1}$; Squat: 0.60 ms$^{-1}$	1	2	55.3191	0.21	13	Bench press	165.4	82.6	28	0	1	2
High pre-set velocity loss	4	Bench press: 0.45 ms$^{-1}$; Squat: 0.60 ms$^{-1}$	2	2	57.4468	0.2	10	Bench press	165.4	82.6	28	0	1	2
High pre-set velocity loss	4	Bench press: 0.45 ms$^{-1}$; Squat: 0.60 ms$^{-1}$	3	1	61.7021	0.18	7	Bench press	165.4	82.6	28	0	1	2
High pre-set velocity loss	4	Bench press: 0.38 ms$^{-1}$; Squat: 0.49 ms$^{-1}$	1	2	55	0.18	9	Bench press	165.4	82.6	28	0	1	2
High pre-set velocity loss	4	Bench press: 0.38 ms$^{-1}$; Squat: 0.49 ms$^{-1}$	2	1	60	0.16	9	Bench press	165.4	82.6	28	0	1	2
High pre-set velocity loss	4	Bench press: 0.38 ms$^{-1}$; Squat: 0.49 ms$^{-1}$	3	3	62.5	0.15	5	Bench press	165.4	82.6	28	0	1	2
High pre-set velocity loss	4	Bench press: 0.53 ms$^{-1}$; Squat: 0.70 ms$^{-1}$	1	2	58.8235	0.21	12	Bench press	165.4	82.6	28	0	1	2
High pre-set velocity loss	4	Bench press: 0.53 ms$^{-1}$; Squat: 0.70 ms$^{-1}$	2	1	62.7451	0.19	9	Bench press	165.4	82.6	28	0	1	2
High pre-set velocity loss	4	Bench press: 0.53 ms$^{-1}$; Squat: 0.70 ms$^{-1}$	3	1	74.5098	0.13	10	Bench press	165.4	82.6	28	0	1	2
High pre-set velocity loss	5	Bench press: 0.45 ms$^{-1}$; Squat: 0.60 ms$^{-1}$	1	2	66.6667	0.15	12	Bench press	165.4	82.6	28	0	1	2
High pre-set velocity loss	5	Bench press: 0.45 ms$^{-1}$; Squat: 0.60 ms$^{-1}$	2	2	40	0.27	9	Bench press	165.4	82.6	28	0	1	2
High pre-set velocity loss	5	Bench press: 0.45 ms$^{-1}$; Squat: 0.60 ms$^{-1}$	3	1	73.3333	0.12	7	Bench press	165.4	82.6	28	0	1	2
High pre-set velocity loss	5	Bench press: 0.45 ms$^{-1}$; Squat: 0.60 ms$^{-1}$	4	2	44.4444	0.25	7	Bench press	165.4	82.6	28	0	1	2
High pre-set velocity loss	5	Bench press: 0.38 ms$^{-1}$; Squat: 0.49 ms$^{-1}$	1	2	51.2195	0.2	9	Bench press	165.4	82.6	28	0	1	2
High pre-set velocity loss	5	Bench press: 0.38 ms$^{-1}$; Squat: 0.49 ms$^{-1}$	2	1	53.6585	0.19	7	Bench press	165.4	82.6	28	0	1	2
High pre-set velocity loss	5	Bench press: 0.38 ms$^{-1}$; Squat: 0.49 ms$^{-1}$	3	1	58.5366	0.17	6	Bench press	165.4	82.6	28	0	1	2
High pre-set velocity loss	5	Bench press: 0.38 ms$^{-1}$; Squat: 0.49 ms$^{-1}$	4	2	53.6585	0.19	5	Bench press	165.4	82.6	28	0	1	2
High pre-set velocity loss	5	Bench press: 0.53 ms$^{-1}$; Squat: 0.70 ms$^{-1}$	1	1	59.6154	0.21	14	Bench press	165.4	82.6	28	0	1	2
High pre-set velocity loss	5	Bench press: 0.53 ms$^{-1}$; Squat: 0.70 ms$^{-1}$	2	2	46.1538	0.28	10	Bench press	165.4	82.6	28	0	1	2
High pre-set velocity loss	5	Bench press: 0.53 ms$^{-1}$; Squat: 0.70 ms$^{-1}$	3	2	59.6154	0.21	11	Bench press	165.4	82.6	28	0	1	2
High pre-set velocity loss	5	Bench press: 0.53 ms$^{-1}$; Squat: 0.70 ms$^{-1}$	4	2	63.4615	0.19	10	Bench press	165.4	82.6	28	0	1	2
High pre-set velocity loss	6	Bench press: 0.45 ms$^{-1}$; Squat: 0.60 ms$^{-1}$	1	1	66.6667	0.16	12	Bench press	165.4	82.6	28	0	1	2
High pre-set velocity loss	6	Bench press: 0.45 ms$^{-1}$; Squat: 0.60 ms$^{-1}$	2	1	66.6667	0.16	10	Bench press	165.4	82.6	28	0	1	2
High pre-set velocity loss	6	Bench press: 0.45 ms$^{-1}$; Squat: 0.60 ms$^{-1}$	3	1	66.6667	0.16	6	Bench press	165.4	82.6	28	0	1	2
High pre-set velocity loss	6	Bench press: 0.45 ms$^{-1}$; Squat: 0.60 ms$^{-1}$	4	1	45.8333	0.26	6	Bench press	165.4	82.6	28	0	1	2
High pre-set velocity loss	6	Bench press: 0.38 ms$^{-1}$; Squat: 0.49 ms$^{-1}$	1	1	64.2857	0.15	8	Bench press	165.4	82.6	28	0	1	2
High pre-set velocity loss	6	Bench press: 0.38 ms$^{-1}$; Squat: 0.49 ms$^{-1}$	2	2	57.1429	0.18	6	Bench press	165.4	82.6	28	0	1	2
High pre-set velocity loss	6	Bench press: 0.38 ms$^{-1}$; Squat: 0.49 ms$^{-1}$	3	1	52.381	0.2	7	Bench press	165.4	82.6	28	0	1	2
High pre-set velocity loss	6	Bench press: 0.38 ms$^{-1}$; Squat: 0.49 ms$^{-1}$	4	1	57.1429	0.18	5	Bench press	165.4	82.6	28	0	1	2
High pre-set velocity loss	6	Bench press: 0.53 ms$^{-1}$; Squat: 0.70 ms$^{-1}$	1	2	49.0566	0.27	12	Bench press	165.4	82.6	28	0	1	2
High pre-set velocity loss	6	Bench press: 0.53 ms$^{-1}$; Squat: 0.70 ms$^{-1}$	2	2	52.8302	0.25	7	Bench press	165.4	82.6	28	0	1	2
High pre-set velocity loss	6	Bench press: 0.53 ms$^{-1}$; Squat: 0.70 ms$^{-1}$	3	1	66.0377	0.18	8	Bench press	165.4	82.6	28	0	1	2
High pre-set velocity loss	6	Bench press: 0.53 ms$^{-1}$; Squat: 0.70 ms$^{-1}$	4	2	66.0377	0.18	6	Bench press	165.4	82.6	28	0	1	2
High pre-set velocity loss	1	Bench press: 0.45 ms$^{-1}$; Squat: 0.60 ms$^{-1}$	1	4	41.3793	0.34	7	Squat	165.4	82.6	28	0	1	2
High pre-set velocity loss	1	Bench press: 0.45 ms$^{-1}$; Squat: 0.60 ms$^{-1}$	2	3	41.3793	0.34	7	Squat	165.4	82.6	28	0	1	2
High pre-set velocity loss	1	Bench press: 0.38 ms$^{-1}$; Squat: 0.49 ms$^{-1}$	1	2	39.6226	0.32	5	Squat	165.4	82.6	28	0	1	2
High pre-set velocity loss	1	Bench press: 0.38 ms$^{-1}$; Squat: 0.49 ms$^{-1}$	2	1	41.5094	0.31	6	Squat	165.4	82.6	28	0	1	2
High pre-set velocity loss	1	Bench press: 0.53 ms$^{-1}$; Squat: 0.70 ms$^{-1}$	1	3	35.8209	0.43	12	Squat	165.4	82.6	28	0	1	2
High pre-set velocity loss	1	Bench press: 0.53 ms$^{-1}$; Squat: 0.70 ms$^{-1}$	2	2	47.7612	0.35	13	Squat	165.4	82.6	28	0	1	2
High pre-set velocity loss	2	Bench press: 0.45 ms$^{-1}$; Squat: 0.60 ms$^{-1}$	1	2	43.5484	0.35	9	Squat	165.4	82.6	28	0	1	2
High pre-set velocity loss	2	Bench press: 0.45 ms$^{-1}$; Squat: 0.60 ms$^{-1}$	2	1	46.7742	0.33	7	Squat	165.4	82.6	28	0	1	2
High pre-set velocity loss	2	Bench press: 0.45 ms$^{-1}$; Squat: 0.60 ms$^{-1}$	3	2	37.0968	0.39	6	Squat	165.4	82.6	28	0	1	2
High pre-set velocity loss	2	Bench press: 0.38 ms$^{-1}$; Squat: 0.49 ms$^{-1}$	1	2	41.1765	0.3	7	Squat	165.4	82.6	28	0	1	2
High pre-set velocity loss	2	Bench press: 0.38 ms$^{-1}$; Squat: 0.49 ms$^{-1}$	2	2	41.1765	0.3	6	Squat	165.4	82.6	28	0	1	2
High pre-set velocity loss	2	Bench press: 0.38 ms$^{-1}$; Squat: 0.49 ms$^{-1}$	3	2	49.0196	0.26	6	Squat	165.4	82.6	28	0	1	2
High pre-set velocity loss	2	Bench press: 0.53 ms$^{-1}$; Squat: 0.70 ms$^{-1}$	1	4	40.2778	0.43	13	Squat	165.4	82.6	28	0	1	2
High pre-set velocity loss	2	Bench press: 0.53 ms$^{-1}$; Squat: 0.70 ms$^{-1}$	2	3	47.2222	0.38	10	Squat	165.4	82.6	28	0	1	2
High pre-set velocity loss	2	Bench press: 0.53 ms$^{-1}$; Squat: 0.70 ms$^{-1}$	3	3	41.6667	0.42	11	Squat	165.4	82.6	28	0	1	2
High pre-set velocity loss	3	Bench press: 0.45 ms$^{-1}$; Squat: 0.60 ms$^{-1}$	1	2	32.7869	0.41	8	Squat	165.4	82.6	28	0	1	2
High pre-set velocity loss	3	Bench press: 0.45 ms$^{-1}$; Squat: 0.60 ms$^{-1}$	2	1	42.623	0.35	8	Squat	165.4	82.6	28	0	1	2
High pre-set velocity loss	3	Bench press: 0.45 ms$^{-1}$; Squat: 0.60 ms$^{-1}$	3	1	39.3443	0.37	6	Squat	165.4	82.6	28	0	1	2
High pre-set velocity loss	3	Bench press: 0.38 ms$^{-1}$; Squat: 0.49 ms$^{-1}$	1	1	38	0.31	6	Squat	165.4	82.6	28	0	1	2
High pre-set velocity loss	3	Bench press: 0.38 ms$^{-1}$; Squat: 0.49 ms$^{-1}$	2	1	36	0.32	5	Squat	165.4	82.6	28	0	1	2
High pre-set velocity loss	3	Bench press: 0.38 ms$^{-1}$; Squat: 0.49 ms$^{-1}$	3	1	46	0.27	5	Squat	165.4	82.6	28	0	1	2
High pre-set velocity loss	3	Bench press: 0.53 ms$^{-1}$; Squat: 0.70 ms$^{-1}$	1	3	43.0769	0.37	15	Squat	165.4	82.6	28	0	1	2
High pre-set velocity loss	3	Bench press: 0.53 ms$^{-1}$; Squat: 0.70 ms$^{-1}$	2	2	36.9231	0.41	11	Squat	165.4	82.6	28	0	1	2
High pre-set velocity loss	3	Bench press: 0.53 ms$^{-1}$; Squat: 0.70 ms$^{-1}$	3	1	47.6923	0.34	10	Squat	165.4	82.6	28	0	1	2
High pre-set velocity loss	4	Bench press: 0.45 ms$^{-1}$; Squat: 0.60 ms$^{-1}$	1	2	34.5455	0.36	9	Squat	165.4	82.6	28	0	1	2
High pre-set velocity loss	4	Bench press: 0.45 ms$^{-1}$; Squat: 0.60 ms$^{-1}$	2	2	34.5455	0.36	8	Squat	165.4	82.6	28	0	1	2
High pre-set velocity loss	4	Bench press: 0.45 ms$^{-1}$; Squat: 0.60 ms$^{-1}$	3	2	40	0.33	7	Squat	165.4	82.6	28	0	1	2
High pre-set velocity loss	4	Bench press: 0.38 ms$^{-1}$; Squat: 0.49 ms$^{-1}$	1	1	34.7826	0.3	6	Squat	165.4	82.6	28	0	1	2
High pre-set velocity loss	4	Bench press: 0.38 ms$^{-1}$; Squat: 0.49 ms$^{-1}$	2	1	34.7826	0.3	6	Squat	165.4	82.6	28	0	1	2
High pre-set velocity loss	4	Bench press: 0.38 ms$^{-1}$; Squat: 0.49 ms$^{-1}$	3	1	47.8261	0.24	7	Squat	165.4	82.6	28	0	1	2
High pre-set velocity loss	4	Bench press: 0.53 ms$^{-1}$; Squat: 0.70 ms$^{-1}$	1	3	38.2353	0.42	14	Squat	165.4	82.6	28	0	1	2
High pre-set velocity loss	4	Bench press: 0.53 ms$^{-1}$; Squat: 0.70 ms$^{-1}$	2	2	45.5882	0.37	13	Squat	165.4	82.6	28	0	1	2
High pre-set velocity loss	5	Bench press: 0.45 ms$^{-1}$; Squat: 0.60 ms$^{-1}$	1	2	44.2623	0.34	10	Squat	165.4	82.6	28	0	1	2
High pre-set velocity loss	5	Bench press: 0.45 ms$^{-1}$; Squat: 0.60 ms$^{-1}$	2	1	55.7377	0.27	8	Squat	165.4	82.6	28	0	1	2
High pre-set velocity loss	5	Bench press: 0.45 ms$^{-1}$; Squat: 0.60 ms$^{-1}$	3	1	42.623	0.35	6	Squat	165.4	82.6	28	0	1	2
High pre-set velocity loss	5	Bench press: 0.45 ms$^{-1}$; Squat: 0.60 ms$^{-1}$	4	2	26.2295	0.45	3	Squat	165.4	82.6	28	0	1	2
High pre-set velocity loss	5	Bench press: 0.38 ms$^{-1}$; Squat: 0.49 ms$^{-1}$	1	2	38.7755	0.3	6	Squat	165.4	82.6	28	0	1	2
High pre-set velocity loss	5	Bench press: 0.38 ms$^{-1}$; Squat: 0.49 ms$^{-1}$	2	0	48.9796	0.25	6	Squat	165.4	82.6	28	0	1	2
High pre-set velocity loss	5	Bench press: 0.38 ms$^{-1}$; Squat: 0.49 ms$^{-1}$	3	3	36.7347	0.31	2	Squat	165.4	82.6	28	0	1	2
High pre-set velocity loss	5	Bench press: 0.38 ms$^{-1}$; Squat: 0.49 ms$^{-1}$	4	1	42.8571	0.28	4	Squat	165.4	82.6	28	0	1	2
High pre-set velocity loss	5	Bench press: 0.53 ms$^{-1}$; Squat: 0.70 ms$^{-1}$	1	1	46.3768	0.37	14	Squat	165.4	82.6	28	0	1	2
High pre-set velocity loss	5	Bench press: 0.53 ms$^{-1}$; Squat: 0.70 ms$^{-1}$	2	2	28.9855	0.49	9	Squat	165.4	82.6	28	0	1	2
High pre-set velocity loss	5	Bench press: 0.53 ms$^{-1}$; Squat: 0.70 ms$^{-1}$	3	2	37.6812	0.43	10	Squat	165.4	82.6	28	0	1	2
High pre-set velocity loss	5	Bench press: 0.53 ms$^{-1}$; Squat: 0.70 ms$^{-1}$	4	1	40.5797	0.41	10	Squat	165.4	82.6	28	0	1	2
High pre-set velocity loss	6	Bench press: 0.45 ms$^{-1}$; Squat: 0.60 ms$^{-1}$	1	2	41.9355	0.36	11	Squat	165.4	82.6	28	0	1	2
High pre-set velocity loss	6	Bench press: 0.45 ms$^{-1}$; Squat: 0.60 ms$^{-1}$	2	1	33.871	0.41	7	Squat	165.4	82.6	28	0	1	2
High pre-set velocity loss	6	Bench press: 0.45 ms$^{-1}$; Squat: 0.60 ms$^{-1}$	3	1	43.5484	0.35	8	Squat	165.4	82.6	28	0	1	2
High pre-set velocity loss	6	Bench press: 0.45 ms$^{-1}$; Squat: 0.60 ms$^{-1}$	4	1	53.2258	0.29	6	Squat	165.4	82.6	28	0	1	2
High pre-set velocity loss	6	Bench press: 0.38 ms$^{-1}$; Squat: 0.49 ms$^{-1}$	1	2	42.3077	0.3	7	Squat	165.4	82.6	28	0	1	2
High pre-set velocity loss	6	Bench press: 0.38 ms$^{-1}$; Squat: 0.49 ms$^{-1}$	2	1	34.6154	0.34	6	Squat	165.4	82.6	28	0	1	2
High pre-set velocity loss	6	Bench press: 0.38 ms$^{-1}$; Squat: 0.49 ms$^{-1}$	3	1	48.0769	0.27	5	Squat	165.4	82.6	28	0	1	2
High pre-set velocity loss	6	Bench press: 0.38 ms$^{-1}$; Squat: 0.49 ms$^{-1}$	4	1	38.4615	0.32	4	Squat	165.4	82.6	28	0	1	2
High pre-set velocity loss	6	Bench press: 0.53 ms$^{-1}$; Squat: 0.70 ms$^{-1}$	1	2	47.0588	0.36	17	Squat	165.4	82.6	28	0	1	2
High pre-set velocity loss	6	Bench press: 0.53 ms$^{-1}$; Squat: 0.70 ms$^{-1}$	2	2	30.8824	0.47	10	Squat	165.4	82.6	28	0	1	2
High pre-set velocity loss	6	Bench press: 0.53 ms$^{-1}$; Squat: 0.70 ms$^{-1}$	3	2	36.7647	0.43	7	Squat	165.4	82.6	28	0	1	2
High pre-set velocity loss	6	Bench press: 0.53 ms$^{-1}$; Squat: 0.70 ms$^{-1}$	4	2	41.1765	0.4	6	Squat	165.4	82.6	28	0	1	2
High pre-set velocity loss	1	Bench press: 0.45 ms$^{-1}$; Squat: 0.60 ms$^{-1}$	1	2	45.2381	0.23	9	Bench press	168.7	66.5	32	1	1	3
High pre-set velocity loss	1	Bench press: 0.45 ms$^{-1}$; Squat: 0.60 ms$^{-1}$	2	1	57.1429	0.18	9	Bench press	168.7	66.5	32	1	1	3
High pre-set velocity loss	1	Bench press: 0.38 ms$^{-1}$; Squat: 0.49 ms$^{-1}$	1	1	60.5263	0.15	9	Bench press	168.7	66.5	32	1	1	3
High pre-set velocity loss	1	Bench press: 0.38 ms$^{-1}$; Squat: 0.49 ms$^{-1}$	2	3	52.6316	0.18	7	Bench press	168.7	66.5	32	1	1	3
High pre-set velocity loss	1	Bench press: 0.53 ms$^{-1}$; Squat: 0.70 ms$^{-1}$	1	2	60.3774	0.21	11	Bench press	168.7	66.5	32	1	1	3
High pre-set velocity loss	1	Bench press: 0.53 ms$^{-1}$; Squat: 0.70 ms$^{-1}$	2	4	60.3774	0.21	11	Bench press	168.7	66.5	32	1	1	3
High pre-set velocity loss	2	Bench press: 0.45 ms$^{-1}$; Squat: 0.60 ms$^{-1}$	1	2	48.8889	0.23	9	Bench press	168.7	66.5	32	1	1	3
High pre-set velocity loss	2	Bench press: 0.45 ms$^{-1}$; Squat: 0.60 ms$^{-1}$	2	1	64.4444	0.16	9	Bench press	168.7	66.5	32	1	1	3
High pre-set velocity loss	2	Bench press: 0.45 ms$^{-1}$; Squat: 0.60 ms$^{-1}$	3	1	64.4444	0.16	7	Bench press	168.7	66.5	32	1	1	3
High pre-set velocity loss	2	Bench press: 0.38 ms$^{-1}$; Squat: 0.49 ms$^{-1}$	1	0	62.5	0.15	6	Bench press	168.7	66.5	32	1	1	3
High pre-set velocity loss	2	Bench press: 0.38 ms$^{-1}$; Squat: 0.49 ms$^{-1}$	2	1	45	0.22	7	Bench press	168.7	66.5	32	1	1	3
High pre-set velocity loss	2	Bench press: 0.38 ms$^{-1}$; Squat: 0.49 ms$^{-1}$	3	1	50	0.2	6	Bench press	168.7	66.5	32	1	1	3
High pre-set velocity loss	2	Bench press: 0.53 ms$^{-1}$; Squat: 0.70 ms$^{-1}$	1	1	54.717	0.24	11	Bench press	168.7	66.5	32	1	1	3
High pre-set velocity loss	2	Bench press: 0.53 ms$^{-1}$; Squat: 0.70 ms$^{-1}$	2	2	52.8302	0.25	11	Bench press	168.7	66.5	32	1	1	3
High pre-set velocity loss	2	Bench press: 0.53 ms$^{-1}$; Squat: 0.70 ms$^{-1}$	3	2	56.6038	0.23	11	Bench press	168.7	66.5	32	1	1	3
High pre-set velocity loss	3	Bench press: 0.45 ms$^{-1}$; Squat: 0.60 ms$^{-1}$	1	1	50	0.24	11	Bench press	168.7	66.5	32	1	1	3
High pre-set velocity loss	3	Bench press: 0.45 ms$^{-1}$; Squat: 0.60 ms$^{-1}$	2	1	58.3333	0.2	10	Bench press	168.7	66.5	32	1	1	3
High pre-set velocity loss	3	Bench press: 0.45 ms$^{-1}$; Squat: 0.60 ms$^{-1}$	3	0	62.5	0.18	10	Bench press	168.7	66.5	32	1	1	3
High pre-set velocity loss	3	Bench press: 0.38 ms$^{-1}$; Squat: 0.49 ms$^{-1}$	1	0	64.1026	0.14	8	Bench press	168.7	66.5	32	1	1	3
High pre-set velocity loss	3	Bench press: 0.38 ms$^{-1}$; Squat: 0.49 ms$^{-1}$	2	0	61.5385	0.15	8	Bench press	168.7	66.5	32	1	1	3
High pre-set velocity loss	3	Bench press: 0.38 ms$^{-1}$; Squat: 0.49 ms$^{-1}$	3	0	58.9744	0.16	6	Bench press	168.7	66.5	32	1	1	3
High pre-set velocity loss	3	Bench press: 0.53 ms$^{-1}$; Squat: 0.70 ms$^{-1}$	1	1	65.4545	0.19	14	Bench press	168.7	66.5	32	1	1	3
High pre-set velocity loss	3	Bench press: 0.53 ms$^{-1}$; Squat: 0.70 ms$^{-1}$	2	2	60	0.22	13	Bench press	168.7	66.5	32	1	1	3
High pre-set velocity loss	3	Bench press: 0.53 ms$^{-1}$; Squat: 0.70 ms$^{-1}$	3	1	61.8182	0.21	10	Bench press	168.7	66.5	32	1	1	3
High pre-set velocity loss	4	Bench press: 0.45 ms$^{-1}$; Squat: 0.60 ms$^{-1}$	1	0	62.2222	0.17	12	Bench press	168.7	66.5	32	1	1	3
High pre-set velocity loss	4	Bench press: 0.45 ms$^{-1}$; Squat: 0.60 ms$^{-1}$	2	1	53.3333	0.21	9	Bench press	168.7	66.5	32	1	1	3
High pre-set velocity loss	4	Bench press: 0.45 ms$^{-1}$; Squat: 0.60 ms$^{-1}$	3	1	66.6667	0.15	9	Bench press	168.7	66.5	32	1	1	3
High pre-set velocity loss	4	Bench press: 0.38 ms$^{-1}$; Squat: 0.49 ms$^{-1}$	1	2	48.5714	0.18	7	Bench press	168.7	66.5	32	1	1	3
High pre-set velocity loss	4	Bench press: 0.38 ms$^{-1}$; Squat: 0.49 ms$^{-1}$	2	1	60	0.14	8	Bench press	168.7	66.5	32	1	1	3
High pre-set velocity loss	4	Bench press: 0.38 ms$^{-1}$; Squat: 0.49 ms$^{-1}$	3	1	57.1429	0.15	7	Bench press	168.7	66.5	32	1	1	3
High pre-set velocity loss	4	Bench press: 0.53 ms$^{-1}$; Squat: 0.70 ms$^{-1}$	1	1	62	0.19	15	Bench press	168.7	66.5	32	1	1	3
High pre-set velocity loss	4	Bench press: 0.53 ms$^{-1}$; Squat: 0.70 ms$^{-1}$	2	2	60	0.2	10	Bench press	168.7	66.5	32	1	1	3
High pre-set velocity loss	4	Bench press: 0.53 ms$^{-1}$; Squat: 0.70 ms$^{-1}$	3	2	58	0.21	13	Bench press	168.7	66.5	32	1	1	3
High pre-set velocity loss	5	Bench press: 0.45 ms$^{-1}$; Squat: 0.60 ms$^{-1}$	1	1	61.9048	0.16	12	Bench press	168.7	66.5	32	1	1	3
High pre-set velocity loss	5	Bench press: 0.45 ms$^{-1}$; Squat: 0.60 ms$^{-1}$	2	1	54.7619	0.19	8	Bench press	168.7	66.5	32	1	1	3
High pre-set velocity loss	5	Bench press: 0.45 ms$^{-1}$; Squat: 0.60 ms$^{-1}$	3	2	45.2381	0.23	9	Bench press	168.7	66.5	32	1	1	3
High pre-set velocity loss	5	Bench press: 0.45 ms$^{-1}$; Squat: 0.60 ms$^{-1}$	4	1	54.7619	0.19	10	Bench press	168.7	66.5	32	1	1	3
High pre-set velocity loss	5	Bench press: 0.38 ms$^{-1}$; Squat: 0.49 ms$^{-1}$	1	2	57.8947	0.16	8	Bench press	168.7	66.5	32	1	1	3
High pre-set velocity loss	5	Bench press: 0.38 ms$^{-1}$; Squat: 0.49 ms$^{-1}$	2	0	63.1579	0.14	7	Bench press	168.7	66.5	32	1	1	3
High pre-set velocity loss	5	Bench press: 0.38 ms$^{-1}$; Squat: 0.49 ms$^{-1}$	3	1	50	0.19	8	Bench press	168.7	66.5	32	1	1	3
High pre-set velocity loss	5	Bench press: 0.38 ms$^{-1}$; Squat: 0.49 ms$^{-1}$	4	0	65.7895	0.13	9	Bench press	168.7	66.5	32	1	1	3
High pre-set velocity loss	5	Bench press: 0.53 ms$^{-1}$; Squat: 0.70 ms$^{-1}$	1	1	56.8627	0.22	13	Bench press	168.7	66.5	32	1	1	3
High pre-set velocity loss	5	Bench press: 0.53 ms$^{-1}$; Squat: 0.70 ms$^{-1}$	2	1	62.7451	0.19	12	Bench press	168.7	66.5	32	1	1	3
High pre-set velocity loss	5	Bench press: 0.53 ms$^{-1}$; Squat: 0.70 ms$^{-1}$	3	2	56.8627	0.22	9	Bench press	168.7	66.5	32	1	1	3
High pre-set velocity loss	5	Bench press: 0.53 ms$^{-1}$; Squat: 0.70 ms$^{-1}$	4	1	62.7451	0.19	10	Bench press	168.7	66.5	32	1	1	3
High pre-set velocity loss	6	Bench press: 0.45 ms$^{-1}$; Squat: 0.60 ms$^{-1}$	1	3	58.3333	0.2	11	Bench press	168.7	66.5	32	1	1	3
High pre-set velocity loss	6	Bench press: 0.45 ms$^{-1}$; Squat: 0.60 ms$^{-1}$	2	2	64.5833	0.17	11	Bench press	168.7	66.5	32	1	1	3
High pre-set velocity loss	6	Bench press: 0.45 ms$^{-1}$; Squat: 0.60 ms$^{-1}$	3	1	66.6667	0.16	9	Bench press	168.7	66.5	32	1	1	3
High pre-set velocity loss	6	Bench press: 0.45 ms$^{-1}$; Squat: 0.60 ms$^{-1}$	4	1	56.25	0.21	9	Bench press	168.7	66.5	32	1	1	3
High pre-set velocity loss	6	Bench press: 0.38 ms$^{-1}$; Squat: 0.49 ms$^{-1}$	1	2	59.5238	0.17	11	Bench press	168.7	66.5	32	1	1	3
High pre-set velocity loss	6	Bench press: 0.38 ms$^{-1}$; Squat: 0.49 ms$^{-1}$	2	0	64.2857	0.15	10	Bench press	168.7	66.5	32	1	1	3
High pre-set velocity loss	6	Bench press: 0.38 ms$^{-1}$; Squat: 0.49 ms$^{-1}$	3	1	61.9048	0.16	8	Bench press	168.7	66.5	32	1	1	3
High pre-set velocity loss	6	Bench press: 0.38 ms$^{-1}$; Squat: 0.49 ms$^{-1}$	4	2	59.5238	0.17	8	Bench press	168.7	66.5	32	1	1	3
High pre-set velocity loss	6	Bench press: 0.53 ms$^{-1}$; Squat: 0.70 ms$^{-1}$	1	3	59.6154	0.21	12	Bench press	168.7	66.5	32	1	1	3
High pre-set velocity loss	6	Bench press: 0.53 ms$^{-1}$; Squat: 0.70 ms$^{-1}$	2	2	69.2308	0.16	14	Bench press	168.7	66.5	32	1	1	3
High pre-set velocity loss	6	Bench press: 0.53 ms$^{-1}$; Squat: 0.70 ms$^{-1}$	3	2	65.3846	0.18	12	Bench press	168.7	66.5	32	1	1	3
High pre-set velocity loss	6	Bench press: 0.53 ms$^{-1}$; Squat: 0.70 ms$^{-1}$	4	1	69.2308	0.16	11	Bench press	168.7	66.5	32	1	1	3
High pre-set velocity loss	1	Bench press: 0.45 ms$^{-1}$; Squat: 0.60 ms$^{-1}$	1	3	29.8246	0.4	6	Squat	168.7	66.5	32	1	1	3
High pre-set velocity loss	1	Bench press: 0.45 ms$^{-1}$; Squat: 0.60 ms$^{-1}$	2	2	36.8421	0.36	9	Squat	168.7	66.5	32	1	1	3
High pre-set velocity loss	1	Bench press: 0.38 ms$^{-1}$; Squat: 0.49 ms$^{-1}$	1	1	38.2979	0.29	8	Squat	168.7	66.5	32	1	1	3
High pre-set velocity loss	1	Bench press: 0.53 ms$^{-1}$; Squat: 0.70 ms$^{-1}$	1	4	36.9863	0.46	17	Squat	168.7	66.5	32	1	1	3
High pre-set velocity loss	1	Bench press: 0.53 ms$^{-1}$; Squat: 0.70 ms$^{-1}$	2	4	36.9863	0.46	13	Squat	168.7	66.5	32	1	1	3
High pre-set velocity loss	2	Bench press: 0.45 ms$^{-1}$; Squat: 0.60 ms$^{-1}$	1	3	33.871	0.41	12	Squat	168.7	66.5	32	1	1	3
High pre-set velocity loss	2	Bench press: 0.45 ms$^{-1}$; Squat: 0.60 ms$^{-1}$	2	2	32.2581	0.42	9	Squat	168.7	66.5	32	1	1	3
High pre-set velocity loss	2	Bench press: 0.45 ms$^{-1}$; Squat: 0.60 ms$^{-1}$	3	2	43.5484	0.35	13	Squat	168.7	66.5	32	1	1	3
High pre-set velocity loss	2	Bench press: 0.38 ms$^{-1}$; Squat: 0.49 ms$^{-1}$	1	2	29.4118	0.36	10	Squat	168.7	66.5	32	1	1	3
High pre-set velocity loss	2	Bench press: 0.38 ms$^{-1}$; Squat: 0.49 ms$^{-1}$	2	2	47.0588	0.27	13	Squat	168.7	66.5	32	1	1	3
High pre-set velocity loss	2	Bench press: 0.38 ms$^{-1}$; Squat: 0.49 ms$^{-1}$	3	2	29.4118	0.36	8	Squat	168.7	66.5	32	1	1	3
High pre-set velocity loss	2	Bench press: 0.53 ms$^{-1}$; Squat: 0.70 ms$^{-1}$	1	2	34.7826	0.45	9	Squat	168.7	66.5	32	1	1	3
High pre-set velocity loss	2	Bench press: 0.53 ms$^{-1}$; Squat: 0.70 ms$^{-1}$	2	1	39.1304	0.42	8	Squat	168.7	66.5	32	1	1	3
High pre-set velocity loss	2	Bench press: 0.53 ms$^{-1}$; Squat: 0.70 ms$^{-1}$	3	0	43.4783	0.39	9	Squat	168.7	66.5	32	1	1	3
High pre-set velocity loss	3	Bench press: 0.45 ms$^{-1}$; Squat: 0.60 ms$^{-1}$	1	2	29.6875	0.45	8	Squat	168.7	66.5	32	1	1	3
High pre-set velocity loss	3	Bench press: 0.45 ms$^{-1}$; Squat: 0.60 ms$^{-1}$	2	0	37.5	0.4	11	Squat	168.7	66.5	32	1	1	3
High pre-set velocity loss	3	Bench press: 0.45 ms$^{-1}$; Squat: 0.60 ms$^{-1}$	3	0	39.0625	0.39	10	Squat	168.7	66.5	32	1	1	3
High pre-set velocity loss	3	Bench press: 0.38 ms$^{-1}$; Squat: 0.49 ms$^{-1}$	1	1	34.0426	0.31	5	Squat	168.7	66.5	32	1	1	3
High pre-set velocity loss	3	Bench press: 0.38 ms$^{-1}$; Squat: 0.49 ms$^{-1}$	2	0	36.1702	0.3	8	Squat	168.7	66.5	32	1	1	3
High pre-set velocity loss	3	Bench press: 0.38 ms$^{-1}$; Squat: 0.49 ms$^{-1}$	3	1	36.1702	0.3	6	Squat	168.7	66.5	32	1	1	3
High pre-set velocity loss	3	Bench press: 0.53 ms$^{-1}$; Squat: 0.70 ms$^{-1}$	1	2	38.806	0.41	11	Squat	168.7	66.5	32	1	1	3
High pre-set velocity loss	3	Bench press: 0.53 ms$^{-1}$; Squat: 0.70 ms$^{-1}$	2	0	46.2687	0.36	11	Squat	168.7	66.5	32	1	1	3
High pre-set velocity loss	3	Bench press: 0.53 ms$^{-1}$; Squat: 0.70 ms$^{-1}$	3	1	44.7761	0.37	12	Squat	168.7	66.5	32	1	1	3
High pre-set velocity loss	4	Bench press: 0.45 ms$^{-1}$; Squat: 0.60 ms$^{-1}$	1	1	40.3226	0.37	12	Squat	168.7	66.5	32	1	1	3
High pre-set velocity loss	4	Bench press: 0.45 ms$^{-1}$; Squat: 0.60 ms$^{-1}$	2	1	32.2581	0.42	10	Squat	168.7	66.5	32	1	1	3
High pre-set velocity loss	4	Bench press: 0.45 ms$^{-1}$; Squat: 0.60 ms$^{-1}$	3	1	37.0968	0.39	9	Squat	168.7	66.5	32	1	1	3
High pre-set velocity loss	4	Bench press: 0.38 ms$^{-1}$; Squat: 0.49 ms$^{-1}$	1	0	42.3077	0.3	10	Squat	168.7	66.5	32	1	1	3
High pre-set velocity loss	4	Bench press: 0.38 ms$^{-1}$; Squat: 0.49 ms$^{-1}$	2	1	46.1538	0.28	7	Squat	168.7	66.5	32	1	1	3
High pre-set velocity loss	4	Bench press: 0.38 ms$^{-1}$; Squat: 0.49 ms$^{-1}$	3	1	40.3846	0.31	7	Squat	168.7	66.5	32	1	1	3
High pre-set velocity loss	4	Bench press: 0.53 ms$^{-1}$; Squat: 0.70 ms$^{-1}$	1	3	38.2353	0.42	15	Squat	168.7	66.5	32	1	1	3
High pre-set velocity loss	4	Bench press: 0.53 ms$^{-1}$; Squat: 0.70 ms$^{-1}$	2	2	41.1765	0.4	16	Squat	168.7	66.5	32	1	1	3
High pre-set velocity loss	4	Bench press: 0.53 ms$^{-1}$; Squat: 0.70 ms$^{-1}$	3	1	45.5882	0.37	12	Squat	168.7	66.5	32	1	1	3
High pre-set velocity loss	5	Bench press: 0.45 ms$^{-1}$; Squat: 0.60 ms$^{-1}$	1	3	35.4839	0.4	14	Squat	168.7	66.5	32	1	1	3
High pre-set velocity loss	5	Bench press: 0.45 ms$^{-1}$; Squat: 0.60 ms$^{-1}$	2	2	38.7097	0.38	10	Squat	168.7	66.5	32	1	1	3
High pre-set velocity loss	5	Bench press: 0.45 ms$^{-1}$; Squat: 0.60 ms$^{-1}$	3	1	37.0968	0.39	10	Squat	168.7	66.5	32	1	1	3
High pre-set velocity loss	5	Bench press: 0.45 ms$^{-1}$; Squat: 0.60 ms$^{-1}$	4	2	38.7097	0.38	12	Squat	168.7	66.5	32	1	1	3
High pre-set velocity loss	5	Bench press: 0.38 ms$^{-1}$; Squat: 0.49 ms$^{-1}$	1	1	38.7755	0.3	5	Squat	168.7	66.5	32	1	1	3
High pre-set velocity loss	5	Bench press: 0.38 ms$^{-1}$; Squat: 0.49 ms$^{-1}$	2	0	40.8163	0.29	7	Squat	168.7	66.5	32	1	1	3
High pre-set velocity loss	5	Bench press: 0.38 ms$^{-1}$; Squat: 0.49 ms$^{-1}$	3	1	38.7755	0.3	8	Squat	168.7	66.5	32	1	1	3
High pre-set velocity loss	5	Bench press: 0.38 ms$^{-1}$; Squat: 0.49 ms$^{-1}$	4	1	40.8163	0.29	7	Squat	168.7	66.5	32	1	1	3
High pre-set velocity loss	5	Bench press: 0.53 ms$^{-1}$; Squat: 0.70 ms$^{-1}$	1	2	37.1429	0.44	19	Squat	168.7	66.5	32	1	1	3
High pre-set velocity loss	5	Bench press: 0.53 ms$^{-1}$; Squat: 0.70 ms$^{-1}$	2	1	41.4286	0.41	20	Squat	168.7	66.5	32	1	1	3
High pre-set velocity loss	5	Bench press: 0.53 ms$^{-1}$; Squat: 0.70 ms$^{-1}$	3	2	41.4286	0.41	16	Squat	168.7	66.5	32	1	1	3
High pre-set velocity loss	5	Bench press: 0.53 ms$^{-1}$; Squat: 0.70 ms$^{-1}$	4	2	44.2857	0.39	16	Squat	168.7	66.5	32	1	1	3
High pre-set velocity loss	6	Bench press: 0.45 ms$^{-1}$; Squat: 0.60 ms$^{-1}$	1	1	41.6667	0.35	13	Squat	168.7	66.5	32	1	1	3
High pre-set velocity loss	6	Bench press: 0.45 ms$^{-1}$; Squat: 0.60 ms$^{-1}$	2	0	38.3333	0.37	13	Squat	168.7	66.5	32	1	1	3
High pre-set velocity loss	6	Bench press: 0.45 ms$^{-1}$; Squat: 0.60 ms$^{-1}$	3	1	38.3333	0.37	13	Squat	168.7	66.5	32	1	1	3
High pre-set velocity loss	6	Bench press: 0.45 ms$^{-1}$; Squat: 0.60 ms$^{-1}$	4	1	48.3333	0.31	10	Squat	168.7	66.5	32	1	1	3
High pre-set velocity loss	6	Bench press: 0.38 ms$^{-1}$; Squat: 0.49 ms$^{-1}$	1	1	41.6667	0.28	11	Squat	168.7	66.5	32	1	1	3
High pre-set velocity loss	6	Bench press: 0.38 ms$^{-1}$; Squat: 0.49 ms$^{-1}$	2	0	43.75	0.27	9	Squat	168.7	66.5	32	1	1	3
High pre-set velocity loss	6	Bench press: 0.38 ms$^{-1}$; Squat: 0.49 ms$^{-1}$	3	1	37.5	0.3	13	Squat	168.7	66.5	32	1	1	3
High pre-set velocity loss	6	Bench press: 0.38 ms$^{-1}$; Squat: 0.49 ms$^{-1}$	4	2	39.5833	0.29	9	Squat	168.7	66.5	32	1	1	3
High pre-set velocity loss	6	Bench press: 0.53 ms$^{-1}$; Squat: 0.70 ms$^{-1}$	1	3	38.4615	0.4	15	Squat	168.7	66.5	32	1	1	3
High pre-set velocity loss	6	Bench press: 0.53 ms$^{-1}$; Squat: 0.70 ms$^{-1}$	2	2	41.5385	0.38	14	Squat	168.7	66.5	32	1	1	3
High pre-set velocity loss	6	Bench press: 0.53 ms$^{-1}$; Squat: 0.70 ms$^{-1}$	3	3	41.5385	0.38	15	Squat	168.7	66.5	32	1	1	3
High pre-set velocity loss	6	Bench press: 0.53 ms$^{-1}$; Squat: 0.70 ms$^{-1}$	4	2	43.0769	0.37	15	Squat	168.7	66.5	32	1	1	3
High pre-set velocity loss	1	Bench press: 0.45 ms$^{-1}$; Squat: 0.60 ms$^{-1}$	1	3	62.2222	0.17	12	Bench press	169.5	75.3	30	1	1	4
High pre-set velocity loss	1	Bench press: 0.45 ms$^{-1}$; Squat: 0.60 ms$^{-1}$	2	3	55.5556	0.2	12	Bench press	169.5	75.3	30	1	1	4
High pre-set velocity loss	1	Bench press: 0.38 ms$^{-1}$; Squat: 0.49 ms$^{-1}$	1	2	61.1111	0.14	10	Bench press	169.5	75.3	30	1	1	4
High pre-set velocity loss	1	Bench press: 0.38 ms$^{-1}$; Squat: 0.49 ms$^{-1}$	2	1	72.2222	0.1	8	Bench press	169.5	75.3	30	1	1	4
High pre-set velocity loss	1	Bench press: 0.53 ms$^{-1}$; Squat: 0.70 ms$^{-1}$	1	3	62.2642	0.2	16	Bench press	169.5	75.3	30	1	1	4
High pre-set velocity loss	1	Bench press: 0.53 ms$^{-1}$; Squat: 0.70 ms$^{-1}$	2	3	64.1509	0.19	14	Bench press	169.5	75.3	30	1	1	4
High pre-set velocity loss	2	Bench press: 0.45 ms$^{-1}$; Squat: 0.60 ms$^{-1}$	1	2	23.8095	0.32	11	Bench press	169.5	75.3	30	1	1	4
High pre-set velocity loss	2	Bench press: 0.45 ms$^{-1}$; Squat: 0.60 ms$^{-1}$	2	2	73.8095	0.11	12	Bench press	169.5	75.3	30	1	1	4
High pre-set velocity loss	2	Bench press: 0.45 ms$^{-1}$; Squat: 0.60 ms$^{-1}$	3	3	71.4286	0.12	12	Bench press	169.5	75.3	30	1	1	4
High pre-set velocity loss	2	Bench press: 0.38 ms$^{-1}$; Squat: 0.49 ms$^{-1}$	1	2	42.4242	0.19	7	Bench press	169.5	75.3	30	1	1	4
High pre-set velocity loss	2	Bench press: 0.38 ms$^{-1}$; Squat: 0.49 ms$^{-1}$	2	2	54.5455	0.15	7	Bench press	169.5	75.3	30	1	1	4
High pre-set velocity loss	2	Bench press: 0.38 ms$^{-1}$; Squat: 0.49 ms$^{-1}$	3	2	57.5758	0.14	8	Bench press	169.5	75.3	30	1	1	4
High pre-set velocity loss	2	Bench press: 0.53 ms$^{-1}$; Squat: 0.70 ms$^{-1}$	1	3	52.9412	0.24	12	Bench press	169.5	75.3	30	1	1	4
High pre-set velocity loss	2	Bench press: 0.53 ms$^{-1}$; Squat: 0.70 ms$^{-1}$	2	2	74.5098	0.13	14	Bench press	169.5	75.3	30	1	1	4
High pre-set velocity loss	2	Bench press: 0.53 ms$^{-1}$; Squat: 0.70 ms$^{-1}$	3	2	56.8627	0.22	14	Bench press	169.5	75.3	30	1	1	4
High pre-set velocity loss	3	Bench press: 0.45 ms$^{-1}$; Squat: 0.60 ms$^{-1}$	1	3	60	0.18	13	Bench press	169.5	75.3	30	1	1	4
High pre-set velocity loss	3	Bench press: 0.45 ms$^{-1}$; Squat: 0.60 ms$^{-1}$	2	3	71.1111	0.13	10	Bench press	169.5	75.3	30	1	1	4
High pre-set velocity loss	3	Bench press: 0.45 ms$^{-1}$; Squat: 0.60 ms$^{-1}$	3	3	57.7778	0.19	10	Bench press	169.5	75.3	30	1	1	4
High pre-set velocity loss	3	Bench press: 0.38 ms$^{-1}$; Squat: 0.49 ms$^{-1}$	1	4	30.5556	0.25	7	Bench press	169.5	75.3	30	1	1	4
High pre-set velocity loss	3	Bench press: 0.38 ms$^{-1}$; Squat: 0.49 ms$^{-1}$	2	4	44.4444	0.2	7	Bench press	169.5	75.3	30	1	1	4
High pre-set velocity loss	3	Bench press: 0.38 ms$^{-1}$; Squat: 0.49 ms$^{-1}$	3	3	61.1111	0.14	7	Bench press	169.5	75.3	30	1	1	4
High pre-set velocity loss	3	Bench press: 0.53 ms$^{-1}$; Squat: 0.70 ms$^{-1}$	1	4	58.8235	0.21	17	Bench press	169.5	75.3	30	1	1	4
High pre-set velocity loss	3	Bench press: 0.53 ms$^{-1}$; Squat: 0.70 ms$^{-1}$	2	3	74.5098	0.13	15	Bench press	169.5	75.3	30	1	1	4
High pre-set velocity loss	3	Bench press: 0.53 ms$^{-1}$; Squat: 0.70 ms$^{-1}$	3	3	45.098	0.28	13	Bench press	169.5	75.3	30	1	1	4
High pre-set velocity loss	4	Bench press: 0.45 ms$^{-1}$; Squat: 0.60 ms$^{-1}$	1	3	61.9048	0.16	12	Bench press	169.5	75.3	30	1	1	4
High pre-set velocity loss	4	Bench press: 0.45 ms$^{-1}$; Squat: 0.60 ms$^{-1}$	2	3	52.381	0.2	11	Bench press	169.5	75.3	30	1	1	4
High pre-set velocity loss	4	Bench press: 0.45 ms$^{-1}$; Squat: 0.60 ms$^{-1}$	3	2	69.0476	0.13	11	Bench press	169.5	75.3	30	1	1	4
High pre-set velocity loss	4	Bench press: 0.38 ms$^{-1}$; Squat: 0.49 ms$^{-1}$	1	2	52.7778	0.17	11	Bench press	169.5	75.3	30	1	1	4
High pre-set velocity loss	4	Bench press: 0.38 ms$^{-1}$; Squat: 0.49 ms$^{-1}$	2	1	63.8889	0.13	11	Bench press	169.5	75.3	30	1	1	4
High pre-set velocity loss	4	Bench press: 0.38 ms$^{-1}$; Squat: 0.49 ms$^{-1}$	3	0	69.4444	0.11	9	Bench press	169.5	75.3	30	1	1	4
High pre-set velocity loss	4	Bench press: 0.53 ms$^{-1}$; Squat: 0.70 ms$^{-1}$	1	3	60	0.2	16	Bench press	169.5	75.3	30	1	1	4
High pre-set velocity loss	4	Bench press: 0.53 ms$^{-1}$; Squat: 0.70 ms$^{-1}$	2	2	68	0.16	14	Bench press	169.5	75.3	30	1	1	4
High pre-set velocity loss	4	Bench press: 0.53 ms$^{-1}$; Squat: 0.70 ms$^{-1}$	3	1	48	0.26	12	Bench press	169.5	75.3	30	1	1	4
High pre-set velocity loss	5	Bench press: 0.45 ms$^{-1}$; Squat: 0.60 ms$^{-1}$	1	3	40.4762	0.25	12	Bench press	169.5	75.3	30	1	1	4
High pre-set velocity loss	5	Bench press: 0.45 ms$^{-1}$; Squat: 0.60 ms$^{-1}$	2	2	57.1429	0.18	13	Bench press	169.5	75.3	30	1	1	4
High pre-set velocity loss	5	Bench press: 0.45 ms$^{-1}$; Squat: 0.60 ms$^{-1}$	3	1	71.4286	0.12	13	Bench press	169.5	75.3	30	1	1	4
High pre-set velocity loss	5	Bench press: 0.45 ms$^{-1}$; Squat: 0.60 ms$^{-1}$	4	1	57.1429	0.18	12	Bench press	169.5	75.3	30	1	1	4
High pre-set velocity loss	5	Bench press: 0.38 ms$^{-1}$; Squat: 0.49 ms$^{-1}$	1	2	60	0.14	10	Bench press	169.5	75.3	30	1	1	4
High pre-set velocity loss	5	Bench press: 0.38 ms$^{-1}$; Squat: 0.49 ms$^{-1}$	2	1	60	0.14	10	Bench press	169.5	75.3	30	1	1	4
High pre-set velocity loss	5	Bench press: 0.38 ms$^{-1}$; Squat: 0.49 ms$^{-1}$	3	1	62.8571	0.13	9	Bench press	169.5	75.3	30	1	1	4
High pre-set velocity loss	5	Bench press: 0.38 ms$^{-1}$; Squat: 0.49 ms$^{-1}$	4	2	54.2857	0.16	7	Bench press	169.5	75.3	30	1	1	4
High pre-set velocity loss	5	Bench press: 0.53 ms$^{-1}$; Squat: 0.70 ms$^{-1}$	1	3	63.0435	0.17	15	Bench press	169.5	75.3	30	1	1	4
High pre-set velocity loss	5	Bench press: 0.53 ms$^{-1}$; Squat: 0.70 ms$^{-1}$	2	2	60.8696	0.18	14	Bench press	169.5	75.3	30	1	1	4
High pre-set velocity loss	5	Bench press: 0.53 ms$^{-1}$; Squat: 0.70 ms$^{-1}$	3	2	47.8261	0.24	9	Bench press	169.5	75.3	30	1	1	4
High pre-set velocity loss	5	Bench press: 0.53 ms$^{-1}$; Squat: 0.70 ms$^{-1}$	4	2	54.3478	0.21	12	Bench press	169.5	75.3	30	1	1	4
High pre-set velocity loss	6	Bench press: 0.45 ms$^{-1}$; Squat: 0.60 ms$^{-1}$	1	3	60	0.18	13	Bench press	169.5	75.3	30	1	1	4
High pre-set velocity loss	6	Bench press: 0.45 ms$^{-1}$; Squat: 0.60 ms$^{-1}$	2	2	60	0.18	12	Bench press	169.5	75.3	30	1	1	4
High pre-set velocity loss	6	Bench press: 0.45 ms$^{-1}$; Squat: 0.60 ms$^{-1}$	3	2	51.1111	0.22	13	Bench press	169.5	75.3	30	1	1	4
High pre-set velocity loss	6	Bench press: 0.45 ms$^{-1}$; Squat: 0.60 ms$^{-1}$	4	2	57.7778	0.19	14	Bench press	169.5	75.3	30	1	1	4
High pre-set velocity loss	6	Bench press: 0.38 ms$^{-1}$; Squat: 0.49 ms$^{-1}$	1	1	67.5676	0.12	11	Bench press	169.5	75.3	30	1	1	4
High pre-set velocity loss	6	Bench press: 0.38 ms$^{-1}$; Squat: 0.49 ms$^{-1}$	2	2	45.9459	0.2	8	Bench press	169.5	75.3	30	1	1	4
High pre-set velocity loss	6	Bench press: 0.38 ms$^{-1}$; Squat: 0.49 ms$^{-1}$	3	2	59.4595	0.15	8	Bench press	169.5	75.3	30	1	1	4
High pre-set velocity loss	6	Bench press: 0.38 ms$^{-1}$; Squat: 0.49 ms$^{-1}$	4	1	62.1622	0.14	10	Bench press	169.5	75.3	30	1	1	4
High pre-set velocity loss	6	Bench press: 0.53 ms$^{-1}$; Squat: 0.70 ms$^{-1}$	1	2	66	0.17	17	Bench press	169.5	75.3	30	1	1	4
High pre-set velocity loss	6	Bench press: 0.53 ms$^{-1}$; Squat: 0.70 ms$^{-1}$	2	3	58	0.21	13	Bench press	169.5	75.3	30	1	1	4
High pre-set velocity loss	6	Bench press: 0.53 ms$^{-1}$; Squat: 0.70 ms$^{-1}$	3	1	76	0.12	11	Bench press	169.5	75.3	30	1	1	4
High pre-set velocity loss	6	Bench press: 0.53 ms$^{-1}$; Squat: 0.70 ms$^{-1}$	4	1	68	0.16	13	Bench press	169.5	75.3	30	1	1	4
High pre-set velocity loss	1	Bench press: 0.45 ms$^{-1}$; Squat: 0.60 ms$^{-1}$	2	3	37.0968	0.39	10	Squat	169.5	75.3	30	1	1	4
High pre-set velocity loss	1	Bench press: 0.38 ms$^{-1}$; Squat: 0.49 ms$^{-1}$	1	4	34.6154	0.34	8	Squat	169.5	75.3	30	1	1	4
High pre-set velocity loss	1	Bench press: 0.38 ms$^{-1}$; Squat: 0.49 ms$^{-1}$	2	3	42.3077	0.3	7	Squat	169.5	75.3	30	1	1	4
High pre-set velocity loss	2	Bench press: 0.38 ms$^{-1}$; Squat: 0.49 ms$^{-1}$	1	4	34.0426	0.31	6	Squat	169.5	75.3	30	1	1	4
High pre-set velocity loss	2	Bench press: 0.38 ms$^{-1}$; Squat: 0.49 ms$^{-1}$	2	3	42.5532	0.27	6	Squat	169.5	75.3	30	1	1	4
High pre-set velocity loss	2	Bench press: 0.38 ms$^{-1}$; Squat: 0.49 ms$^{-1}$	3	3	38.2979	0.29	6	Squat	169.5	75.3	30	1	1	4
High pre-set velocity loss	3	Bench press: 0.38 ms$^{-1}$; Squat: 0.49 ms$^{-1}$	1	3	50	0.23	8	Squat	169.5	75.3	30	1	1	4
High pre-set velocity loss	3	Bench press: 0.38 ms$^{-1}$; Squat: 0.49 ms$^{-1}$	2	3	23.913	0.35	7	Squat	169.5	75.3	30	1	1	4
High pre-set velocity loss	3	Bench press: 0.38 ms$^{-1}$; Squat: 0.49 ms$^{-1}$	3	3	50	0.23	9	Squat	169.5	75.3	30	1	1	4
High pre-set velocity loss	4	Bench press: 0.38 ms$^{-1}$; Squat: 0.49 ms$^{-1}$	1	2	42.5532	0.27	7	Squat	169.5	75.3	30	1	1	4
High pre-set velocity loss	4	Bench press: 0.38 ms$^{-1}$; Squat: 0.49 ms$^{-1}$	2	2	42.5532	0.27	7	Squat	169.5	75.3	30	1	1	4
High pre-set velocity loss	4	Bench press: 0.38 ms$^{-1}$; Squat: 0.49 ms$^{-1}$	3	1	46.8085	0.25	6	Squat	169.5	75.3	30	1	1	4
High pre-set velocity loss	5	Bench press: 0.45 ms$^{-1}$; Squat: 0.60 ms$^{-1}$	1	4	41.6667	0.35	12	Squat	169.5	75.3	30	1	1	4
High pre-set velocity loss	5	Bench press: 0.45 ms$^{-1}$; Squat: 0.60 ms$^{-1}$	2	4	40	0.36	12	Squat	169.5	75.3	30	1	1	4
High pre-set velocity loss	5	Bench press: 0.45 ms$^{-1}$; Squat: 0.60 ms$^{-1}$	4	3	38.3333	0.37	12	Squat	169.5	75.3	30	1	1	4
High pre-set velocity loss	5	Bench press: 0.38 ms$^{-1}$; Squat: 0.49 ms$^{-1}$	1	2	46.9388	0.26	8	Squat	169.5	75.3	30	1	1	4
High pre-set velocity loss	5	Bench press: 0.38 ms$^{-1}$; Squat: 0.49 ms$^{-1}$	2	3	40.8163	0.29	9	Squat	169.5	75.3	30	1	1	4
High pre-set velocity loss	5	Bench press: 0.38 ms$^{-1}$; Squat: 0.49 ms$^{-1}$	3	3	44.898	0.27	9	Squat	169.5	75.3	30	1	1	4
High pre-set velocity loss	5	Bench press: 0.38 ms$^{-1}$; Squat: 0.49 ms$^{-1}$	4	2	30.6122	0.34	7	Squat	169.5	75.3	30	1	1	4
High pre-set velocity loss	5	Bench press: 0.53 ms$^{-1}$; Squat: 0.70 ms$^{-1}$	3	4	48.5714	0.36	20	Squat	169.5	75.3	30	1	1	4
High pre-set velocity loss	6	Bench press: 0.45 ms$^{-1}$; Squat: 0.60 ms$^{-1}$	1	4	33.8983	0.39	15	Squat	169.5	75.3	30	1	1	4
High pre-set velocity loss	6	Bench press: 0.45 ms$^{-1}$; Squat: 0.60 ms$^{-1}$	2	3	49.1525	0.3	15	Squat	169.5	75.3	30	1	1	4
High pre-set velocity loss	6	Bench press: 0.45 ms$^{-1}$; Squat: 0.60 ms$^{-1}$	3	4	38.9831	0.36	13	Squat	169.5	75.3	30	1	1	4
High pre-set velocity loss	6	Bench press: 0.45 ms$^{-1}$; Squat: 0.60 ms$^{-1}$	4	3	38.9831	0.36	13	Squat	169.5	75.3	30	1	1	4
High pre-set velocity loss	6	Bench press: 0.38 ms$^{-1}$; Squat: 0.49 ms$^{-1}$	1	2	42.2222	0.26	7	Squat	169.5	75.3	30	1	1	4
High pre-set velocity loss	6	Bench press: 0.38 ms$^{-1}$; Squat: 0.49 ms$^{-1}$	2	1	44.4444	0.25	8	Squat	169.5	75.3	30	1	1	4
High pre-set velocity loss	6	Bench press: 0.38 ms$^{-1}$; Squat: 0.49 ms$^{-1}$	3	3	31.1111	0.31	6	Squat	169.5	75.3	30	1	1	4
High pre-set velocity loss	6	Bench press: 0.38 ms$^{-1}$; Squat: 0.49 ms$^{-1}$	4	2	40	0.27	6	Squat	169.5	75.3	30	1	1	4
High pre-set velocity loss	6	Bench press: 0.53 ms$^{-1}$; Squat: 0.70 ms$^{-1}$	3	3	44.2857	0.39	18	Squat	169.5	75.3	30	1	1	4
High pre-set velocity loss	6	Bench press: 0.53 ms$^{-1}$; Squat: 0.70 ms$^{-1}$	4	3	40	0.42	16	Squat	169.5	75.3	30	1	1	4
Low pre-set velocity loss	1	Bench press: 0.45 ms$^{-1}$; Squat: 0.60 ms$^{-1}$	1	3	21.7391	0.36	3	Bench press	169.9	63.4	25	1	1	5
Low pre-set velocity loss	1	Bench press: 0.45 ms$^{-1}$; Squat: 0.60 ms$^{-1}$	2	2	41.3043	0.27	4	Bench press	169.9	63.4	25	1	1	5
Low pre-set velocity loss	1	Bench press: 0.45 ms$^{-1}$; Squat: 0.60 ms$^{-1}$	3	2	45.6522	0.25	3	Bench press	169.9	63.4	25	1	1	5
Low pre-set velocity loss	1	Bench press: 0.38 ms$^{-1}$; Squat: 0.49 ms$^{-1}$	1	1	34.2105	0.25	3	Bench press	169.9	63.4	25	1	1	5
Low pre-set velocity loss	1	Bench press: 0.38 ms$^{-1}$; Squat: 0.49 ms$^{-1}$	2	1	28.9474	0.27	2	Bench press	169.9	63.4	25	1	1	5
Low pre-set velocity loss	1	Bench press: 0.38 ms$^{-1}$; Squat: 0.49 ms$^{-1}$	3	2	31.5789	0.26	2	Bench press	169.9	63.4	25	1	1	5
Low pre-set velocity loss	1	Bench press: 0.38 ms$^{-1}$; Squat: 0.49 ms$^{-1}$	4	2	23.6842	0.29	1	Bench press	169.9	63.4	25	1	1	5
Low pre-set velocity loss	1	Bench press: 0.53 ms$^{-1}$; Squat: 0.70 ms$^{-1}$	1	2	31.4815	0.37	4	Bench press	169.9	63.4	25	1	1	5
Low pre-set velocity loss	1	Bench press: 0.53 ms$^{-1}$; Squat: 0.70 ms$^{-1}$	2	2	44.4444	0.3	5	Bench press	169.9	63.4	25	1	1	5
Low pre-set velocity loss	1	Bench press: 0.53 ms$^{-1}$; Squat: 0.70 ms$^{-1}$	3	3	31.4815	0.37	3	Bench press	169.9	63.4	25	1	1	5
Low pre-set velocity loss	1	Bench press: 0.53 ms$^{-1}$; Squat: 0.70 ms$^{-1}$	4	2	27.7778	0.39	3	Bench press	169.9	63.4	25	1	1	5
Low pre-set velocity loss	1	Bench press: 0.53 ms$^{-1}$; Squat: 0.70 ms$^{-1}$	5	2	31.4815	0.37	3	Bench press	169.9	63.4	25	1	1	5
Low pre-set velocity loss	1	Bench press: 0.53 ms$^{-1}$; Squat: 0.70 ms$^{-1}$	6	4	14.8148	0.46	1	Bench press	169.9	63.4	25	1	1	5
Low pre-set velocity loss	1	Bench press: 0.53 ms$^{-1}$; Squat: 0.70 ms$^{-1}$	7	3	27.7778	0.39	3	Bench press	169.9	63.4	25	1	1	5
Low pre-set velocity loss	2	Bench press: 0.45 ms$^{-1}$; Squat: 0.60 ms$^{-1}$	1	2	37.5	0.3	4	Bench press	169.9	63.4	25	1	1	5
Low pre-set velocity loss	2	Bench press: 0.45 ms$^{-1}$; Squat: 0.60 ms$^{-1}$	2	2	39.5833	0.29	5	Bench press	169.9	63.4	25	1	1	5
Low pre-set velocity loss	2	Bench press: 0.45 ms$^{-1}$; Squat: 0.60 ms$^{-1}$	3	2	33.3333	0.32	3	Bench press	169.9	63.4	25	1	1	5
Low pre-set velocity loss	2	Bench press: 0.45 ms$^{-1}$; Squat: 0.60 ms$^{-1}$	4	2	29.1667	0.34	3	Bench press	169.9	63.4	25	1	1	5
Low pre-set velocity loss	2	Bench press: 0.45 ms$^{-1}$; Squat: 0.60 ms$^{-1}$	5	3	16.6667	0.4	2	Bench press	169.9	63.4	25	1	1	5
Low pre-set velocity loss	2	Bench press: 0.45 ms$^{-1}$; Squat: 0.60 ms$^{-1}$	6	3	22.9167	0.37	3	Bench press	169.9	63.4	25	1	1	5
Low pre-set velocity loss	2	Bench press: 0.38 ms$^{-1}$; Squat: 0.49 ms$^{-1}$	1	1	36.8421	0.24	3	Bench press	169.9	63.4	25	1	1	5
Low pre-set velocity loss	2	Bench press: 0.38 ms$^{-1}$; Squat: 0.49 ms$^{-1}$	2	0	60.5263	0.15	3	Bench press	169.9	63.4	25	1	1	5
Low pre-set velocity loss	2	Bench press: 0.38 ms$^{-1}$; Squat: 0.49 ms$^{-1}$	3	1	34.2105	0.25	2	Bench press	169.9	63.4	25	1	1	5
Low pre-set velocity loss	2	Bench press: 0.38 ms$^{-1}$; Squat: 0.49 ms$^{-1}$	4	1	39.4737	0.23	2	Bench press	169.9	63.4	25	1	1	5
Low pre-set velocity loss	2	Bench press: 0.38 ms$^{-1}$; Squat: 0.49 ms$^{-1}$	5	1	31.5789	0.26	2	Bench press	169.9	63.4	25	1	1	5
Low pre-set velocity loss	2	Bench press: 0.38 ms$^{-1}$; Squat: 0.49 ms$^{-1}$	6	2	26.3158	0.28	1	Bench press	169.9	63.4	25	1	1	5
Low pre-set velocity loss	2	Bench press: 0.38 ms$^{-1}$; Squat: 0.49 ms$^{-1}$	7	2	28.9474	0.27	2	Bench press	169.9	63.4	25	1	1	5
Low pre-set velocity loss	2	Bench press: 0.38 ms$^{-1}$; Squat: 0.49 ms$^{-1}$	8	2	23.6842	0.29	1	Bench press	169.9	63.4	25	1	1	5
Low pre-set velocity loss	2	Bench press: 0.53 ms$^{-1}$; Squat: 0.70 ms$^{-1}$	1	2	38.4615	0.32	5	Bench press	169.9	63.4	25	1	1	5
Low pre-set velocity loss	2	Bench press: 0.53 ms$^{-1}$; Squat: 0.70 ms$^{-1}$	2	2	40.3846	0.31	5	Bench press	169.9	63.4	25	1	1	5
Low pre-set velocity loss	2	Bench press: 0.53 ms$^{-1}$; Squat: 0.70 ms$^{-1}$	3	2	40.3846	0.31	4	Bench press	169.9	63.4	25	1	1	5
Low pre-set velocity loss	2	Bench press: 0.53 ms$^{-1}$; Squat: 0.70 ms$^{-1}$	4	2	23.0769	0.4	3	Bench press	169.9	63.4	25	1	1	5
Low pre-set velocity loss	2	Bench press: 0.53 ms$^{-1}$; Squat: 0.70 ms$^{-1}$	5	2	30.7692	0.36	3	Bench press	169.9	63.4	25	1	1	5
Low pre-set velocity loss	2	Bench press: 0.53 ms$^{-1}$; Squat: 0.70 ms$^{-1}$	6	1	46.1538	0.28	4	Bench press	169.9	63.4	25	1	1	5
Low pre-set velocity loss	2	Bench press: 0.53 ms$^{-1}$; Squat: 0.70 ms$^{-1}$	7	1	28.8462	0.37	3	Bench press	169.9	63.4	25	1	1	5
Low pre-set velocity loss	2	Bench press: 0.53 ms$^{-1}$; Squat: 0.70 ms$^{-1}$	8	2	23.0769	0.4	2	Bench press	169.9	63.4	25	1	1	5
Low pre-set velocity loss	3	Bench press: 0.45 ms$^{-1}$; Squat: 0.60 ms$^{-1}$	1	2	29.7872	0.33	4	Bench press	169.9	63.4	25	1	1	5
Low pre-set velocity loss	3	Bench press: 0.45 ms$^{-1}$; Squat: 0.60 ms$^{-1}$	2	1	36.1702	0.3	4	Bench press	169.9	63.4	25	1	1	5
Low pre-set velocity loss	3	Bench press: 0.45 ms$^{-1}$; Squat: 0.60 ms$^{-1}$	3	1	53.1915	0.22	4	Bench press	169.9	63.4	25	1	1	5
Low pre-set velocity loss	3	Bench press: 0.45 ms$^{-1}$; Squat: 0.60 ms$^{-1}$	4	2	14.8936	0.4	2	Bench press	169.9	63.4	25	1	1	5
Low pre-set velocity loss	3	Bench press: 0.45 ms$^{-1}$; Squat: 0.60 ms$^{-1}$	5	2	21.2766	0.37	3	Bench press	169.9	63.4	25	1	1	5
Low pre-set velocity loss	3	Bench press: 0.45 ms$^{-1}$; Squat: 0.60 ms$^{-1}$	6	2	31.9149	0.32	3	Bench press	169.9	63.4	25	1	1	5
Low pre-set velocity loss	3	Bench press: 0.38 ms$^{-1}$; Squat: 0.49 ms$^{-1}$	1	1	38.8889	0.22	2	Bench press	169.9	63.4	25	1	1	5
Low pre-set velocity loss	3	Bench press: 0.38 ms$^{-1}$; Squat: 0.49 ms$^{-1}$	2	2	22.2222	0.28	2	Bench press	169.9	63.4	25	1	1	5
Low pre-set velocity loss	3	Bench press: 0.38 ms$^{-1}$; Squat: 0.49 ms$^{-1}$	3	1	33.3333	0.24	2	Bench press	169.9	63.4	25	1	1	5
Low pre-set velocity loss	3	Bench press: 0.38 ms$^{-1}$; Squat: 0.49 ms$^{-1}$	4	0	58.3333	0.15	2	Bench press	169.9	63.4	25	1	1	5
Low pre-set velocity loss	3	Bench press: 0.38 ms$^{-1}$; Squat: 0.49 ms$^{-1}$	5	1	22.2222	0.28	1	Bench press	169.9	63.4	25	1	1	5
Low pre-set velocity loss	3	Bench press: 0.38 ms$^{-1}$; Squat: 0.49 ms$^{-1}$	6	0	19.4444	0.29	1	Bench press	169.9	63.4	25	1	1	5
Low pre-set velocity loss	3	Bench press: 0.38 ms$^{-1}$; Squat: 0.49 ms$^{-1}$	7	2	16.6667	0.3	1	Bench press	169.9	63.4	25	1	1	5
Low pre-set velocity loss	3	Bench press: 0.53 ms$^{-1}$; Squat: 0.70 ms$^{-1}$	1	2	44.2308	0.29	6	Bench press	169.9	63.4	25	1	1	5
Low pre-set velocity loss	3	Bench press: 0.53 ms$^{-1}$; Squat: 0.70 ms$^{-1}$	2	3	28.8462	0.37	4	Bench press	169.9	63.4	25	1	1	5
Low pre-set velocity loss	3	Bench press: 0.53 ms$^{-1}$; Squat: 0.70 ms$^{-1}$	3	2	26.9231	0.38	4	Bench press	169.9	63.4	25	1	1	5
Low pre-set velocity loss	3	Bench press: 0.53 ms$^{-1}$; Squat: 0.70 ms$^{-1}$	4	2	34.6154	0.34	4	Bench press	169.9	63.4	25	1	1	5
Low pre-set velocity loss	3	Bench press: 0.53 ms$^{-1}$; Squat: 0.70 ms$^{-1}$	5	1	30.7692	0.36	4	Bench press	169.9	63.4	25	1	1	5
Low pre-set velocity loss	3	Bench press: 0.53 ms$^{-1}$; Squat: 0.70 ms$^{-1}$	6	2	36.5385	0.33	3	Bench press	169.9	63.4	25	1	1	5
Low pre-set velocity loss	3	Bench press: 0.53 ms$^{-1}$; Squat: 0.70 ms$^{-1}$	7	2	26.9231	0.38	2	Bench press	169.9	63.4	25	1	1	5
Low pre-set velocity loss	3	Bench press: 0.53 ms$^{-1}$; Squat: 0.70 ms$^{-1}$	8	3	15.3846	0.44	1	Bench press	169.9	63.4	25	1	1	5
Low pre-set velocity loss	4	Bench press: 0.45 ms$^{-1}$; Squat: 0.60 ms$^{-1}$	1	2	31.9149	0.32	3	Bench press	169.9	63.4	25	1	1	5
Low pre-set velocity loss	4	Bench press: 0.45 ms$^{-1}$; Squat: 0.60 ms$^{-1}$	2	2	21.2766	0.37	3	Bench press	169.9	63.4	25	1	1	5
Low pre-set velocity loss	4	Bench press: 0.45 ms$^{-1}$; Squat: 0.60 ms$^{-1}$	3	3	19.1489	0.38	3	Bench press	169.9	63.4	25	1	1	5
Low pre-set velocity loss	4	Bench press: 0.45 ms$^{-1}$; Squat: 0.60 ms$^{-1}$	4	2	21.2766	0.37	4	Bench press	169.9	63.4	25	1	1	5
Low pre-set velocity loss	4	Bench press: 0.45 ms$^{-1}$; Squat: 0.60 ms$^{-1}$	5	2	42.5532	0.27	3	Bench press	169.9	63.4	25	1	1	5
Low pre-set velocity loss	4	Bench press: 0.45 ms$^{-1}$; Squat: 0.60 ms$^{-1}$	6	2	40.4255	0.28	3	Bench press	169.9	63.4	25	1	1	5
Low pre-set velocity loss	4	Bench press: 0.45 ms$^{-1}$; Squat: 0.60 ms$^{-1}$	7	2	27.6596	0.34	3	Bench press	169.9	63.4	25	1	1	5
Low pre-set velocity loss	4	Bench press: 0.38 ms$^{-1}$; Squat: 0.49 ms$^{-1}$	1	0	22.2222	0.28	2	Bench press	169.9	63.4	25	1	1	5
Low pre-set velocity loss	4	Bench press: 0.38 ms$^{-1}$; Squat: 0.49 ms$^{-1}$	2	1	27.7778	0.26	2	Bench press	169.9	63.4	25	1	1	5
Low pre-set velocity loss	4	Bench press: 0.38 ms$^{-1}$; Squat: 0.49 ms$^{-1}$	3	0	33.3333	0.24	2	Bench press	169.9	63.4	25	1	1	5
Low pre-set velocity loss	4	Bench press: 0.38 ms$^{-1}$; Squat: 0.49 ms$^{-1}$	4	0	38.8889	0.22	2	Bench press	169.9	63.4	25	1	1	5
Low pre-set velocity loss	4	Bench press: 0.38 ms$^{-1}$; Squat: 0.49 ms$^{-1}$	5	0	25	0.27	2	Bench press	169.9	63.4	25	1	1	5
Low pre-set velocity loss	4	Bench press: 0.38 ms$^{-1}$; Squat: 0.49 ms$^{-1}$	6	0	25	0.27	2	Bench press	169.9	63.4	25	1	1	5
Low pre-set velocity loss	4	Bench press: 0.53 ms$^{-1}$; Squat: 0.70 ms$^{-1}$	1	2	34.6939	0.32	4	Bench press	169.9	63.4	25	1	1	5
Low pre-set velocity loss	4	Bench press: 0.53 ms$^{-1}$; Squat: 0.70 ms$^{-1}$	2	2	22.449	0.38	4	Bench press	169.9	63.4	25	1	1	5
Low pre-set velocity loss	4	Bench press: 0.53 ms$^{-1}$; Squat: 0.70 ms$^{-1}$	3	2	30.6122	0.34	3	Bench press	169.9	63.4	25	1	1	5
Low pre-set velocity loss	4	Bench press: 0.53 ms$^{-1}$; Squat: 0.70 ms$^{-1}$	4	2	38.7755	0.3	3	Bench press	169.9	63.4	25	1	1	5
Low pre-set velocity loss	4	Bench press: 0.53 ms$^{-1}$; Squat: 0.70 ms$^{-1}$	5	2	38.7755	0.3	3	Bench press	169.9	63.4	25	1	1	5
Low pre-set velocity loss	4	Bench press: 0.53 ms$^{-1}$; Squat: 0.70 ms$^{-1}$	6	2	20.4082	0.39	2	Bench press	169.9	63.4	25	1	1	5
Low pre-set velocity loss	4	Bench press: 0.53 ms$^{-1}$; Squat: 0.70 ms$^{-1}$	7	2	22.449	0.38	3	Bench press	169.9	63.4	25	1	1	5
Low pre-set velocity loss	4	Bench press: 0.53 ms$^{-1}$; Squat: 0.70 ms$^{-1}$	8	2	24.4898	0.37	3	Bench press	169.9	63.4	25	1	1	5
Low pre-set velocity loss	5	Bench press: 0.45 ms$^{-1}$; Squat: 0.60 ms$^{-1}$	1	1	41.8605	0.25	4	Bench press	169.9	63.4	25	1	1	5
Low pre-set velocity loss	5	Bench press: 0.45 ms$^{-1}$; Squat: 0.60 ms$^{-1}$	2	2	27.907	0.31	4	Bench press	169.9	63.4	25	1	1	5
Low pre-set velocity loss	5	Bench press: 0.45 ms$^{-1}$; Squat: 0.60 ms$^{-1}$	3	0	44.186	0.24	4	Bench press	169.9	63.4	25	1	1	5
Low pre-set velocity loss	5	Bench press: 0.45 ms$^{-1}$; Squat: 0.60 ms$^{-1}$	4	2	32.5581	0.29	3	Bench press	169.9	63.4	25	1	1	5
Low pre-set velocity loss	5	Bench press: 0.45 ms$^{-1}$; Squat: 0.60 ms$^{-1}$	5	2	27.907	0.31	3	Bench press	169.9	63.4	25	1	1	5
Low pre-set velocity loss	5	Bench press: 0.45 ms$^{-1}$; Squat: 0.60 ms$^{-1}$	6	2	37.2093	0.27	3	Bench press	169.9	63.4	25	1	1	5
Low pre-set velocity loss	5	Bench press: 0.45 ms$^{-1}$; Squat: 0.60 ms$^{-1}$	7	2	13.9535	0.37	2	Bench press	169.9	63.4	25	1	1	5
Low pre-set velocity loss	5	Bench press: 0.38 ms$^{-1}$; Squat: 0.49 ms$^{-1}$	1	1	36.8421	0.24	3	Bench press	169.9	63.4	25	1	1	5
Low pre-set velocity loss	5	Bench press: 0.38 ms$^{-1}$; Squat: 0.49 ms$^{-1}$	2	0	50	0.19	3	Bench press	169.9	63.4	25	1	1	5
Low pre-set velocity loss	5	Bench press: 0.38 ms$^{-1}$; Squat: 0.49 ms$^{-1}$	3	1	21.0526	0.3	2	Bench press	169.9	63.4	25	1	1	5
Low pre-set velocity loss	5	Bench press: 0.38 ms$^{-1}$; Squat: 0.49 ms$^{-1}$	4	0	39.4737	0.23	3	Bench press	169.9	63.4	25	1	1	5
Low pre-set velocity loss	5	Bench press: 0.38 ms$^{-1}$; Squat: 0.49 ms$^{-1}$	5	1	34.2105	0.25	2	Bench press	169.9	63.4	25	1	1	5
Low pre-set velocity loss	5	Bench press: 0.38 ms$^{-1}$; Squat: 0.49 ms$^{-1}$	6	2	18.4211	0.31	2	Bench press	169.9	63.4	25	1	1	5
Low pre-set velocity loss	5	Bench press: 0.38 ms$^{-1}$; Squat: 0.49 ms$^{-1}$	7	1	23.6842	0.29	2	Bench press	169.9	63.4	25	1	1	5
Low pre-set velocity loss	5	Bench press: 0.53 ms$^{-1}$; Squat: 0.70 ms$^{-1}$	1	3	32	0.34	5	Bench press	169.9	63.4	25	1	1	5
Low pre-set velocity loss	5	Bench press: 0.53 ms$^{-1}$; Squat: 0.70 ms$^{-1}$	2	3	36	0.32	5	Bench press	169.9	63.4	25	1	1	5
Low pre-set velocity loss	5	Bench press: 0.53 ms$^{-1}$; Squat: 0.70 ms$^{-1}$	3	2	26	0.37	5	Bench press	169.9	63.4	25	1	1	5
Low pre-set velocity loss	5	Bench press: 0.53 ms$^{-1}$; Squat: 0.70 ms$^{-1}$	4	2	26	0.37	4	Bench press	169.9	63.4	25	1	1	5
Low pre-set velocity loss	5	Bench press: 0.53 ms$^{-1}$; Squat: 0.70 ms$^{-1}$	5	2	26	0.37	4	Bench press	169.9	63.4	25	1	1	5
Low pre-set velocity loss	5	Bench press: 0.53 ms$^{-1}$; Squat: 0.70 ms$^{-1}$	6	2	38	0.31	4	Bench press	169.9	63.4	25	1	1	5
Low pre-set velocity loss	6	Bench press: 0.45 ms$^{-1}$; Squat: 0.60 ms$^{-1}$	1	1	41.8605	0.25	3	Bench press	169.9	63.4	25	1	1	5
Low pre-set velocity loss	6	Bench press: 0.45 ms$^{-1}$; Squat: 0.60 ms$^{-1}$	2	2	23.2558	0.33	3	Bench press	169.9	63.4	25	1	1	5
Low pre-set velocity loss	6	Bench press: 0.45 ms$^{-1}$; Squat: 0.60 ms$^{-1}$	3	2	13.9535	0.37	2	Bench press	169.9	63.4	25	1	1	5
Low pre-set velocity loss	6	Bench press: 0.45 ms$^{-1}$; Squat: 0.60 ms$^{-1}$	4	2	39.5349	0.26	3	Bench press	169.9	63.4	25	1	1	5
Low pre-set velocity loss	6	Bench press: 0.45 ms$^{-1}$; Squat: 0.60 ms$^{-1}$	5	1	44.186	0.24	3	Bench press	169.9	63.4	25	1	1	5
Low pre-set velocity loss	6	Bench press: 0.45 ms$^{-1}$; Squat: 0.60 ms$^{-1}$	6	1	20.9302	0.34	2	Bench press	169.9	63.4	25	1	1	5
Low pre-set velocity loss	6	Bench press: 0.45 ms$^{-1}$; Squat: 0.60 ms$^{-1}$	7	1	30.2326	0.3	2	Bench press	169.9	63.4	25	1	1	5
Low pre-set velocity loss	6	Bench press: 0.45 ms$^{-1}$; Squat: 0.60 ms$^{-1}$	8	0	41.8605	0.25	3	Bench press	169.9	63.4	25	1	1	5
Low pre-set velocity loss	6	Bench press: 0.45 ms$^{-1}$; Squat: 0.60 ms$^{-1}$	9	2	27.907	0.31	2	Bench press	169.9	63.4	25	1	1	5
Low pre-set velocity loss	6	Bench press: 0.45 ms$^{-1}$; Squat: 0.60 ms$^{-1}$	10	2	20.9302	0.34	2	Bench press	169.9	63.4	25	1	1	5
Low pre-set velocity loss	6	Bench press: 0.38 ms$^{-1}$; Squat: 0.49 ms$^{-1}$	1	0	26.8293	0.3	3	Bench press	169.9	63.4	25	1	1	5
Low pre-set velocity loss	6	Bench press: 0.38 ms$^{-1}$; Squat: 0.49 ms$^{-1}$	2	1	26.8293	0.3	3	Bench press	169.9	63.4	25	1	1	5
Low pre-set velocity loss	6	Bench press: 0.38 ms$^{-1}$; Squat: 0.49 ms$^{-1}$	3	0	39.0244	0.25	3	Bench press	169.9	63.4	25	1	1	5
Low pre-set velocity loss	6	Bench press: 0.38 ms$^{-1}$; Squat: 0.49 ms$^{-1}$	4	2	9.7561	0.37	2	Bench press	169.9	63.4	25	1	1	5
Low pre-set velocity loss	6	Bench press: 0.38 ms$^{-1}$; Squat: 0.49 ms$^{-1}$	5	1	36.5854	0.26	3	Bench press	169.9	63.4	25	1	1	5
Low pre-set velocity loss	6	Bench press: 0.38 ms$^{-1}$; Squat: 0.49 ms$^{-1}$	6	1	24.3902	0.31	2	Bench press	169.9	63.4	25	1	1	5
Low pre-set velocity loss	6	Bench press: 0.38 ms$^{-1}$; Squat: 0.49 ms$^{-1}$	7	1	34.1463	0.27	3	Bench press	169.9	63.4	25	1	1	5
Low pre-set velocity loss	6	Bench press: 0.53 ms$^{-1}$; Squat: 0.70 ms$^{-1}$	1	2	32	0.34	5	Bench press	169.9	63.4	25	1	1	5
Low pre-set velocity loss	6	Bench press: 0.53 ms$^{-1}$; Squat: 0.70 ms$^{-1}$	2	2	32	0.34	5	Bench press	169.9	63.4	25	1	1	5
Low pre-set velocity loss	6	Bench press: 0.53 ms$^{-1}$; Squat: 0.70 ms$^{-1}$	3	3	26	0.37	4	Bench press	169.9	63.4	25	1	1	5
Low pre-set velocity loss	6	Bench press: 0.53 ms$^{-1}$; Squat: 0.70 ms$^{-1}$	4	1	42	0.29	5	Bench press	169.9	63.4	25	1	1	5
Low pre-set velocity loss	6	Bench press: 0.53 ms$^{-1}$; Squat: 0.70 ms$^{-1}$	5	1	36	0.32	4	Bench press	169.9	63.4	25	1	1	5
Low pre-set velocity loss	6	Bench press: 0.53 ms$^{-1}$; Squat: 0.70 ms$^{-1}$	6	1	42	0.29	4	Bench press	169.9	63.4	25	1	1	5
Low pre-set velocity loss	6	Bench press: 0.53 ms$^{-1}$; Squat: 0.70 ms$^{-1}$	7	2	30	0.35	3	Bench press	169.9	63.4	25	1	1	5
Low pre-set velocity loss	6	Bench press: 0.53 ms$^{-1}$; Squat: 0.70 ms$^{-1}$	8	2	24	0.38	2	Bench press	169.9	63.4	25	1	1	5
Low pre-set velocity loss	1	Bench press: 0.45 ms$^{-1}$; Squat: 0.60 ms$^{-1}$	1	2	28.125	0.46	6	Squat	169.9	63.4	25	1	1	5
Low pre-set velocity loss	1	Bench press: 0.45 ms$^{-1}$; Squat: 0.60 ms$^{-1}$	3	3	17.1875	0.53	3	Squat	169.9	63.4	25	1	1	5
Low pre-set velocity loss	1	Bench press: 0.38 ms$^{-1}$; Squat: 0.49 ms$^{-1}$	1	2	18.3673	0.4	4	Squat	169.9	63.4	25	1	1	5
Low pre-set velocity loss	1	Bench press: 0.38 ms$^{-1}$; Squat: 0.49 ms$^{-1}$	2	3	10.2041	0.44	3	Squat	169.9	63.4	25	1	1	5
Low pre-set velocity loss	1	Bench press: 0.38 ms$^{-1}$; Squat: 0.49 ms$^{-1}$	3	1	22.449	0.38	4	Squat	169.9	63.4	25	1	1	5
Low pre-set velocity loss	1	Bench press: 0.53 ms$^{-1}$; Squat: 0.70 ms$^{-1}$	1	3	22.3881	0.52	5	Squat	169.9	63.4	25	1	1	5
Low pre-set velocity loss	1	Bench press: 0.53 ms$^{-1}$; Squat: 0.70 ms$^{-1}$	2	3	17.9104	0.55	5	Squat	169.9	63.4	25	1	1	5
Low pre-set velocity loss	1	Bench press: 0.53 ms$^{-1}$; Squat: 0.70 ms$^{-1}$	4	3	25.3731	0.5	3	Squat	169.9	63.4	25	1	1	5
Low pre-set velocity loss	1	Bench press: 0.53 ms$^{-1}$; Squat: 0.70 ms$^{-1}$	5	2	17.9104	0.55	3	Squat	169.9	63.4	25	1	1	5
Low pre-set velocity loss	2	Bench press: 0.45 ms$^{-1}$; Squat: 0.60 ms$^{-1}$	1	4	22.2222	0.49	6	Squat	169.9	63.4	25	1	1	5
Low pre-set velocity loss	2	Bench press: 0.45 ms$^{-1}$; Squat: 0.60 ms$^{-1}$	2	3	19.0476	0.51	5	Squat	169.9	63.4	25	1	1	5
Low pre-set velocity loss	2	Bench press: 0.45 ms$^{-1}$; Squat: 0.60 ms$^{-1}$	3	3	11.1111	0.56	4	Squat	169.9	63.4	25	1	1	5
Low pre-set velocity loss	2	Bench press: 0.45 ms$^{-1}$; Squat: 0.60 ms$^{-1}$	4	2	26.9841	0.46	7	Squat	169.9	63.4	25	1	1	5
Low pre-set velocity loss	2	Bench press: 0.38 ms$^{-1}$; Squat: 0.49 ms$^{-1}$	1	2	28.8462	0.37	6	Squat	169.9	63.4	25	1	1	5
Low pre-set velocity loss	2	Bench press: 0.38 ms$^{-1}$; Squat: 0.49 ms$^{-1}$	2	2	13.4615	0.45	3	Squat	169.9	63.4	25	1	1	5
Low pre-set velocity loss	2	Bench press: 0.38 ms$^{-1}$; Squat: 0.49 ms$^{-1}$	3	1	30.7692	0.36	4	Squat	169.9	63.4	25	1	1	5
Low pre-set velocity loss	2	Bench press: 0.53 ms$^{-1}$; Squat: 0.70 ms$^{-1}$	1	4	15.1515	0.56	5	Squat	169.9	63.4	25	1	1	5
Low pre-set velocity loss	2	Bench press: 0.53 ms$^{-1}$; Squat: 0.70 ms$^{-1}$	2	4	27.2727	0.48	7	Squat	169.9	63.4	25	1	1	5
Low pre-set velocity loss	2	Bench press: 0.53 ms$^{-1}$; Squat: 0.70 ms$^{-1}$	3	3	19.697	0.53	4	Squat	169.9	63.4	25	1	1	5
Low pre-set velocity loss	2	Bench press: 0.53 ms$^{-1}$; Squat: 0.70 ms$^{-1}$	4	3	25.7576	0.49	5	Squat	169.9	63.4	25	1	1	5
Low pre-set velocity loss	2	Bench press: 0.53 ms$^{-1}$; Squat: 0.70 ms$^{-1}$	5	3	15.1515	0.56	5	Squat	169.9	63.4	25	1	1	5
Low pre-set velocity loss	2	Bench press: 0.53 ms$^{-1}$; Squat: 0.70 ms$^{-1}$	6	4	19.697	0.53	3	Squat	169.9	63.4	25	1	1	5
Low pre-set velocity loss	3	Bench press: 0.45 ms$^{-1}$; Squat: 0.60 ms$^{-1}$	1	4	11.6667	0.53	4	Squat	169.9	63.4	25	1	1	5
Low pre-set velocity loss	3	Bench press: 0.45 ms$^{-1}$; Squat: 0.60 ms$^{-1}$	2	3	16.6667	0.5	5	Squat	169.9	63.4	25	1	1	5
Low pre-set velocity loss	3	Bench press: 0.45 ms$^{-1}$; Squat: 0.60 ms$^{-1}$	3	3	18.3333	0.49	6	Squat	169.9	63.4	25	1	1	5
Low pre-set velocity loss	3	Bench press: 0.45 ms$^{-1}$; Squat: 0.60 ms$^{-1}$	4	2	28.3333	0.43	4	Squat	169.9	63.4	25	1	1	5
Low pre-set velocity loss	3	Bench press: 0.38 ms$^{-1}$; Squat: 0.49 ms$^{-1}$	1	1	18	0.41	3	Squat	169.9	63.4	25	1	1	5
Low pre-set velocity loss	3	Bench press: 0.38 ms$^{-1}$; Squat: 0.49 ms$^{-1}$	2	1	24	0.38	2	Squat	169.9	63.4	25	1	1	5
Low pre-set velocity loss	3	Bench press: 0.38 ms$^{-1}$; Squat: 0.49 ms$^{-1}$	3	2	22	0.39	3	Squat	169.9	63.4	25	1	1	5
Low pre-set velocity loss	3	Bench press: 0.38 ms$^{-1}$; Squat: 0.49 ms$^{-1}$	4	2	20	0.4	2	Squat	169.9	63.4	25	1	1	5
Low pre-set velocity loss	3	Bench press: 0.38 ms$^{-1}$; Squat: 0.49 ms$^{-1}$	5	1	28	0.36	2	Squat	169.9	63.4	25	1	1	5
Low pre-set velocity loss	3	Bench press: 0.38 ms$^{-1}$; Squat: 0.49 ms$^{-1}$	6	2	12	0.44	1	Squat	169.9	63.4	25	1	1	5
Low pre-set velocity loss	3	Bench press: 0.38 ms$^{-1}$; Squat: 0.49 ms$^{-1}$	7	2	14	0.43	1	Squat	169.9	63.4	25	1	1	5
Low pre-set velocity loss	3	Bench press: 0.53 ms$^{-1}$; Squat: 0.70 ms$^{-1}$	3	4	26.7606	0.52	9	Squat	169.9	63.4	25	1	1	5
Low pre-set velocity loss	4	Bench press: 0.45 ms$^{-1}$; Squat: 0.60 ms$^{-1}$	1	3	17.5439	0.47	4	Squat	169.9	63.4	25	1	1	5
Low pre-set velocity loss	4	Bench press: 0.45 ms$^{-1}$; Squat: 0.60 ms$^{-1}$	2	3	26.3158	0.42	4	Squat	169.9	63.4	25	1	1	5
Low pre-set velocity loss	4	Bench press: 0.45 ms$^{-1}$; Squat: 0.60 ms$^{-1}$	3	3	17.5439	0.47	3	Squat	169.9	63.4	25	1	1	5
Low pre-set velocity loss	4	Bench press: 0.45 ms$^{-1}$; Squat: 0.60 ms$^{-1}$	4	2	28.0702	0.41	3	Squat	169.9	63.4	25	1	1	5
Low pre-set velocity loss	4	Bench press: 0.45 ms$^{-1}$; Squat: 0.60 ms$^{-1}$	5	2	26.3158	0.42	2	Squat	169.9	63.4	25	1	1	5
Low pre-set velocity loss	4	Bench press: 0.45 ms$^{-1}$; Squat: 0.60 ms$^{-1}$	6	2	28.0702	0.41	2	Squat	169.9	63.4	25	1	1	5
Low pre-set velocity loss	4	Bench press: 0.45 ms$^{-1}$; Squat: 0.60 ms$^{-1}$	7	2	10.5263	0.51	2	Squat	169.9	63.4	25	1	1	5
Low pre-set velocity loss	4	Bench press: 0.38 ms$^{-1}$; Squat: 0.49 ms$^{-1}$	1	2	26.5306	0.36	3	Squat	169.9	63.4	25	1	1	5
Low pre-set velocity loss	4	Bench press: 0.38 ms$^{-1}$; Squat: 0.49 ms$^{-1}$	2	2	20.4082	0.39	2	Squat	169.9	63.4	25	1	1	5
Low pre-set velocity loss	4	Bench press: 0.38 ms$^{-1}$; Squat: 0.49 ms$^{-1}$	3	2	26.5306	0.36	2	Squat	169.9	63.4	25	1	1	5
Low pre-set velocity loss	4	Bench press: 0.38 ms$^{-1}$; Squat: 0.49 ms$^{-1}$	4	1	10.2041	0.44	1	Squat	169.9	63.4	25	1	1	5
Low pre-set velocity loss	4	Bench press: 0.38 ms$^{-1}$; Squat: 0.49 ms$^{-1}$	5	2	12.2449	0.43	1	Squat	169.9	63.4	25	1	1	5
Low pre-set velocity loss	4	Bench press: 0.38 ms$^{-1}$; Squat: 0.49 ms$^{-1}$	6	1	28.5714	0.35	1	Squat	169.9	63.4	25	1	1	5
Low pre-set velocity loss	4	Bench press: 0.53 ms$^{-1}$; Squat: 0.70 ms$^{-1}$	1	4	22.5352	0.55	9	Squat	169.9	63.4	25	1	1	5
Low pre-set velocity loss	4	Bench press: 0.53 ms$^{-1}$; Squat: 0.70 ms$^{-1}$	2	4	25.3521	0.53	7	Squat	169.9	63.4	25	1	1	5
Low pre-set velocity loss	4	Bench press: 0.53 ms$^{-1}$; Squat: 0.70 ms$^{-1}$	3	4	11.2676	0.63	5	Squat	169.9	63.4	25	1	1	5
Low pre-set velocity loss	4	Bench press: 0.53 ms$^{-1}$; Squat: 0.70 ms$^{-1}$	4	4	18.3099	0.58	6	Squat	169.9	63.4	25	1	1	5
Low pre-set velocity loss	5	Bench press: 0.45 ms$^{-1}$; Squat: 0.60 ms$^{-1}$	1	3	18.3333	0.49	6	Squat	169.9	63.4	25	1	1	5
Low pre-set velocity loss	5	Bench press: 0.45 ms$^{-1}$; Squat: 0.60 ms$^{-1}$	2	2	21.6667	0.47	7	Squat	169.9	63.4	25	1	1	5
Low pre-set velocity loss	5	Bench press: 0.45 ms$^{-1}$; Squat: 0.60 ms$^{-1}$	3	2	23.3333	0.46	6	Squat	169.9	63.4	25	1	1	5
Low pre-set velocity loss	5	Bench press: 0.45 ms$^{-1}$; Squat: 0.60 ms$^{-1}$	4	2	16.6667	0.5	5	Squat	169.9	63.4	25	1	1	5
Low pre-set velocity loss	5	Bench press: 0.38 ms$^{-1}$; Squat: 0.49 ms$^{-1}$	1	2	29.6296	0.38	5	Squat	169.9	63.4	25	1	1	5
Low pre-set velocity loss	5	Bench press: 0.38 ms$^{-1}$; Squat: 0.49 ms$^{-1}$	2	3	16.6667	0.45	3	Squat	169.9	63.4	25	1	1	5
Low pre-set velocity loss	5	Bench press: 0.38 ms$^{-1}$; Squat: 0.49 ms$^{-1}$	3	2	24.0741	0.41	4	Squat	169.9	63.4	25	1	1	5
Low pre-set velocity loss	5	Bench press: 0.38 ms$^{-1}$; Squat: 0.49 ms$^{-1}$	4	2	18.5185	0.44	2	Squat	169.9	63.4	25	1	1	5
Low pre-set velocity loss	5	Bench press: 0.53 ms$^{-1}$; Squat: 0.70 ms$^{-1}$	1	4	20.8333	0.57	10	Squat	169.9	63.4	25	1	1	5
Low pre-set velocity loss	5	Bench press: 0.53 ms$^{-1}$; Squat: 0.70 ms$^{-1}$	2	4	20.8333	0.57	7	Squat	169.9	63.4	25	1	1	5
Low pre-set velocity loss	5	Bench press: 0.53 ms$^{-1}$; Squat: 0.70 ms$^{-1}$	3	4	19.4444	0.58	7	Squat	169.9	63.4	25	1	1	5
Low pre-set velocity loss	5	Bench press: 0.53 ms$^{-1}$; Squat: 0.70 ms$^{-1}$	4	3	23.6111	0.55	7	Squat	169.9	63.4	25	1	1	5
Low pre-set velocity loss	6	Bench press: 0.45 ms$^{-1}$; Squat: 0.60 ms$^{-1}$	1	4	17.7419	0.51	6	Squat	169.9	63.4	25	1	1	5
Low pre-set velocity loss	6	Bench press: 0.45 ms$^{-1}$; Squat: 0.60 ms$^{-1}$	2	3	14.5161	0.53	4	Squat	169.9	63.4	25	1	1	5
Low pre-set velocity loss	6	Bench press: 0.45 ms$^{-1}$; Squat: 0.60 ms$^{-1}$	3	3	22.5806	0.48	4	Squat	169.9	63.4	25	1	1	5
Low pre-set velocity loss	6	Bench press: 0.45 ms$^{-1}$; Squat: 0.60 ms$^{-1}$	4	3	20.9677	0.49	4	Squat	169.9	63.4	25	1	1	5
Low pre-set velocity loss	6	Bench press: 0.45 ms$^{-1}$; Squat: 0.60 ms$^{-1}$	5	2	20.9677	0.49	3	Squat	169.9	63.4	25	1	1	5
Low pre-set velocity loss	6	Bench press: 0.45 ms$^{-1}$; Squat: 0.60 ms$^{-1}$	6	3	14.5161	0.53	3	Squat	169.9	63.4	25	1	1	5
Low pre-set velocity loss	6	Bench press: 0.45 ms$^{-1}$; Squat: 0.60 ms$^{-1}$	7	2	16.129	0.52	3	Squat	169.9	63.4	25	1	1	5
Low pre-set velocity loss	6	Bench press: 0.45 ms$^{-1}$; Squat: 0.60 ms$^{-1}$	8	2	22.5806	0.48	2	Squat	169.9	63.4	25	1	1	5
Low pre-set velocity loss	6	Bench press: 0.38 ms$^{-1}$; Squat: 0.49 ms$^{-1}$	1	2	15.3846	0.44	2	Squat	169.9	63.4	25	1	1	5
Low pre-set velocity loss	6	Bench press: 0.38 ms$^{-1}$; Squat: 0.49 ms$^{-1}$	2	2	25	0.39	3	Squat	169.9	63.4	25	1	1	5
Low pre-set velocity loss	6	Bench press: 0.38 ms$^{-1}$; Squat: 0.49 ms$^{-1}$	3	2	25	0.39	3	Squat	169.9	63.4	25	1	1	5
Low pre-set velocity loss	6	Bench press: 0.38 ms$^{-1}$; Squat: 0.49 ms$^{-1}$	4	3	19.2308	0.42	2	Squat	169.9	63.4	25	1	1	5
Low pre-set velocity loss	6	Bench press: 0.38 ms$^{-1}$; Squat: 0.49 ms$^{-1}$	5	2	11.5385	0.46	1	Squat	169.9	63.4	25	1	1	5
Low pre-set velocity loss	6	Bench press: 0.38 ms$^{-1}$; Squat: 0.49 ms$^{-1}$	6	2	15.3846	0.44	2	Squat	169.9	63.4	25	1	1	5
Low pre-set velocity loss	6	Bench press: 0.38 ms$^{-1}$; Squat: 0.49 ms$^{-1}$	7	2	23.0769	0.4	2	Squat	169.9	63.4	25	1	1	5
Low pre-set velocity loss	6	Bench press: 0.53 ms$^{-1}$; Squat: 0.70 ms$^{-1}$	1	4	17.8082	0.6	6	Squat	169.9	63.4	25	1	1	5
Low pre-set velocity loss	6	Bench press: 0.53 ms$^{-1}$; Squat: 0.70 ms$^{-1}$	2	4	19.1781	0.59	6	Squat	169.9	63.4	25	1	1	5
Low pre-set velocity loss	6	Bench press: 0.53 ms$^{-1}$; Squat: 0.70 ms$^{-1}$	3	4	20.5479	0.58	7	Squat	169.9	63.4	25	1	1	5
Low pre-set velocity loss	6	Bench press: 0.53 ms$^{-1}$; Squat: 0.70 ms$^{-1}$	4	3	19.1781	0.59	8	Squat	169.9	63.4	25	1	1	5
Low pre-set velocity loss	1	Bench press: 0.45 ms$^{-1}$; Squat: 0.60 ms$^{-1}$	1	2	27.5	0.29	6	Bench press	170.4	76.7	26	0	1	6
Low pre-set velocity loss	1	Bench press: 0.45 ms$^{-1}$; Squat: 0.60 ms$^{-1}$	2	3	27.5	0.29	4	Bench press	170.4	76.7	26	0	1	6
Low pre-set velocity loss	1	Bench press: 0.38 ms$^{-1}$; Squat: 0.49 ms$^{-1}$	1	4	25	0.3	5	Bench press	170.4	76.7	26	0	1	6
Low pre-set velocity loss	1	Bench press: 0.38 ms$^{-1}$; Squat: 0.49 ms$^{-1}$	2	2	30	0.28	4	Bench press	170.4	76.7	26	0	1	6
Low pre-set velocity loss	1	Bench press: 0.53 ms$^{-1}$; Squat: 0.70 ms$^{-1}$	1	3	30.9091	0.38	8	Bench press	170.4	76.7	26	0	1	6
Low pre-set velocity loss	1	Bench press: 0.53 ms$^{-1}$; Squat: 0.70 ms$^{-1}$	2	3	30.9091	0.38	10	Bench press	170.4	76.7	26	0	1	6
Low pre-set velocity loss	1	Bench press: 0.53 ms$^{-1}$; Squat: 0.70 ms$^{-1}$	3	2	30.9091	0.38	7	Bench press	170.4	76.7	26	0	1	6
Low pre-set velocity loss	2	Bench press: 0.45 ms$^{-1}$; Squat: 0.60 ms$^{-1}$	1	3	25.5319	0.35	7	Bench press	170.4	76.7	26	0	1	6
Low pre-set velocity loss	2	Bench press: 0.45 ms$^{-1}$; Squat: 0.60 ms$^{-1}$	2	3	27.6596	0.34	8	Bench press	170.4	76.7	26	0	1	6
Low pre-set velocity loss	2	Bench press: 0.45 ms$^{-1}$; Squat: 0.60 ms$^{-1}$	3	2	34.0426	0.31	7	Bench press	170.4	76.7	26	0	1	6
Low pre-set velocity loss	2	Bench press: 0.38 ms$^{-1}$; Squat: 0.49 ms$^{-1}$	1	3	30	0.28	4	Bench press	170.4	76.7	26	0	1	6
Low pre-set velocity loss	2	Bench press: 0.38 ms$^{-1}$; Squat: 0.49 ms$^{-1}$	2	3	37.5	0.25	6	Bench press	170.4	76.7	26	0	1	6
Low pre-set velocity loss	2	Bench press: 0.38 ms$^{-1}$; Squat: 0.49 ms$^{-1}$	3	2	37.5	0.25	5	Bench press	170.4	76.7	26	0	1	6
Low pre-set velocity loss	2	Bench press: 0.38 ms$^{-1}$; Squat: 0.49 ms$^{-1}$	4	1	35	0.26	3	Bench press	170.4	76.7	26	0	1	6
Low pre-set velocity loss	2	Bench press: 0.38 ms$^{-1}$; Squat: 0.49 ms$^{-1}$	5	1	47.5	0.21	4	Bench press	170.4	76.7	26	0	1	6
Low pre-set velocity loss	2	Bench press: 0.53 ms$^{-1}$; Squat: 0.70 ms$^{-1}$	2	4	35.2941	0.33	8	Bench press	170.4	76.7	26	0	1	6
Low pre-set velocity loss	2	Bench press: 0.53 ms$^{-1}$; Squat: 0.70 ms$^{-1}$	3	4	29.4118	0.36	6	Bench press	170.4	76.7	26	0	1	6
Low pre-set velocity loss	3	Bench press: 0.45 ms$^{-1}$; Squat: 0.60 ms$^{-1}$	1	3	26.1905	0.31	5	Bench press	170.4	76.7	26	0	1	6
Low pre-set velocity loss	3	Bench press: 0.45 ms$^{-1}$; Squat: 0.60 ms$^{-1}$	2	3	35.7143	0.27	6	Bench press	170.4	76.7	26	0	1	6
Low pre-set velocity loss	3	Bench press: 0.45 ms$^{-1}$; Squat: 0.60 ms$^{-1}$	3	4	38.0952	0.26	6	Bench press	170.4	76.7	26	0	1	6
Low pre-set velocity loss	3	Bench press: 0.45 ms$^{-1}$; Squat: 0.60 ms$^{-1}$	4	2	40.4762	0.25	5	Bench press	170.4	76.7	26	0	1	6
Low pre-set velocity loss	3	Bench press: 0.38 ms$^{-1}$; Squat: 0.49 ms$^{-1}$	1	4	27.5	0.29	7	Bench press	170.4	76.7	26	0	1	6
Low pre-set velocity loss	3	Bench press: 0.38 ms$^{-1}$; Squat: 0.49 ms$^{-1}$	2	3	25	0.3	6	Bench press	170.4	76.7	26	0	1	6
Low pre-set velocity loss	3	Bench press: 0.53 ms$^{-1}$; Squat: 0.70 ms$^{-1}$	3	4	27.7778	0.39	6	Bench press	170.4	76.7	26	0	1	6
Low pre-set velocity loss	4	Bench press: 0.45 ms$^{-1}$; Squat: 0.60 ms$^{-1}$	1	4	30.2326	0.3	5	Bench press	170.4	76.7	26	0	1	6
Low pre-set velocity loss	4	Bench press: 0.45 ms$^{-1}$; Squat: 0.60 ms$^{-1}$	3	4	30.2326	0.3	5	Bench press	170.4	76.7	26	0	1	6
Low pre-set velocity loss	4	Bench press: 0.45 ms$^{-1}$; Squat: 0.60 ms$^{-1}$	4	4	27.907	0.31	4	Bench press	170.4	76.7	26	0	1	6
Low pre-set velocity loss	4	Bench press: 0.45 ms$^{-1}$; Squat: 0.60 ms$^{-1}$	5	3	30.2326	0.3	4	Bench press	170.4	76.7	26	0	1	6
Low pre-set velocity loss	4	Bench press: 0.38 ms$^{-1}$; Squat: 0.49 ms$^{-1}$	1	4	24.3902	0.31	6	Bench press	170.4	76.7	26	0	1	6
Low pre-set velocity loss	4	Bench press: 0.38 ms$^{-1}$; Squat: 0.49 ms$^{-1}$	2	4	29.2683	0.29	4	Bench press	170.4	76.7	26	0	1	6
Low pre-set velocity loss	4	Bench press: 0.38 ms$^{-1}$; Squat: 0.49 ms$^{-1}$	3	3	41.4634	0.24	5	Bench press	170.4	76.7	26	0	1	6
Low pre-set velocity loss	4	Bench press: 0.53 ms$^{-1}$; Squat: 0.70 ms$^{-1}$	1	3	42.8571	0.32	10	Bench press	170.4	76.7	26	0	1	6
Low pre-set velocity loss	4	Bench press: 0.53 ms$^{-1}$; Squat: 0.70 ms$^{-1}$	2	4	35.7143	0.36	6	Bench press	170.4	76.7	26	0	1	6
Low pre-set velocity loss	4	Bench press: 0.53 ms$^{-1}$; Squat: 0.70 ms$^{-1}$	4	4	37.5	0.35	8	Bench press	170.4	76.7	26	0	1	6
Low pre-set velocity loss	5	Bench press: 0.45 ms$^{-1}$; Squat: 0.60 ms$^{-1}$	1	3	40	0.27	6	Bench press	170.4	76.7	26	0	1	6
Low pre-set velocity loss	5	Bench press: 0.45 ms$^{-1}$; Squat: 0.60 ms$^{-1}$	2	3	37.7778	0.28	6	Bench press	170.4	76.7	26	0	1	6
Low pre-set velocity loss	5	Bench press: 0.45 ms$^{-1}$; Squat: 0.60 ms$^{-1}$	3	4	40	0.27	5	Bench press	170.4	76.7	26	0	1	6
Low pre-set velocity loss	5	Bench press: 0.38 ms$^{-1}$; Squat: 0.49 ms$^{-1}$	1	4	28.2051	0.28	4	Bench press	170.4	76.7	26	0	1	6
Low pre-set velocity loss	5	Bench press: 0.38 ms$^{-1}$; Squat: 0.49 ms$^{-1}$	2	4	30.7692	0.27	6	Bench press	170.4	76.7	26	0	1	6
Low pre-set velocity loss	5	Bench press: 0.38 ms$^{-1}$; Squat: 0.49 ms$^{-1}$	3	3	35.8974	0.25	5	Bench press	170.4	76.7	26	0	1	6
Low pre-set velocity loss	5	Bench press: 0.53 ms$^{-1}$; Squat: 0.70 ms$^{-1}$	1	3	27.7778	0.39	9	Bench press	170.4	76.7	26	0	1	6
Low pre-set velocity loss	5	Bench press: 0.53 ms$^{-1}$; Squat: 0.70 ms$^{-1}$	2	3	29.6296	0.38	8	Bench press	170.4	76.7	26	0	1	6
Low pre-set velocity loss	5	Bench press: 0.53 ms$^{-1}$; Squat: 0.70 ms$^{-1}$	3	4	31.4815	0.37	7	Bench press	170.4	76.7	26	0	1	6
Low pre-set velocity loss	6	Bench press: 0.45 ms$^{-1}$; Squat: 0.60 ms$^{-1}$	1	4	27.2727	0.32	5	Bench press	170.4	76.7	26	0	1	6
Low pre-set velocity loss	6	Bench press: 0.45 ms$^{-1}$; Squat: 0.60 ms$^{-1}$	2	4	25	0.33	5	Bench press	170.4	76.7	26	0	1	6
Low pre-set velocity loss	6	Bench press: 0.45 ms$^{-1}$; Squat: 0.60 ms$^{-1}$	3	3	34.0909	0.29	5	Bench press	170.4	76.7	26	0	1	6
Low pre-set velocity loss	6	Bench press: 0.45 ms$^{-1}$; Squat: 0.60 ms$^{-1}$	4	3	31.8182	0.3	4	Bench press	170.4	76.7	26	0	1	6
Low pre-set velocity loss	6	Bench press: 0.45 ms$^{-1}$; Squat: 0.60 ms$^{-1}$	5	3	29.5455	0.31	4	Bench press	170.4	76.7	26	0	1	6
Low pre-set velocity loss	6	Bench press: 0.45 ms$^{-1}$; Squat: 0.60 ms$^{-1}$	6	3	25	0.33	3	Bench press	170.4	76.7	26	0	1	6
High pre-set velocity loss	1	Bench press: 0.45 ms$^{-1}$; Squat: 0.60 ms$^{-1}$	1	2	52.6316	0.18	6	Bench press	170.4	76.7	26	0	1	6
High pre-set velocity loss	1	Bench press: 0.45 ms$^{-1}$; Squat: 0.60 ms$^{-1}$	2	2	44.7368	0.21	6	Bench press	170.4	76.7	26	0	1	6
High pre-set velocity loss	1	Bench press: 0.38 ms$^{-1}$; Squat: 0.49 ms$^{-1}$	1	1	60	0.14	7	Bench press	170.4	76.7	26	0	1	6
High pre-set velocity loss	1	Bench press: 0.38 ms$^{-1}$; Squat: 0.49 ms$^{-1}$	2	0	80	0.07	5	Bench press	170.4	76.7	26	0	1	6
High pre-set velocity loss	1	Bench press: 0.53 ms$^{-1}$; Squat: 0.70 ms$^{-1}$	1	1	62.963	0.2	14	Bench press	170.4	76.7	26	0	1	6
High pre-set velocity loss	1	Bench press: 0.53 ms$^{-1}$; Squat: 0.70 ms$^{-1}$	2	3	42.5926	0.31	8	Bench press	170.4	76.7	26	0	1	6
High pre-set velocity loss	2	Bench press: 0.45 ms$^{-1}$; Squat: 0.60 ms$^{-1}$	1	0	64.4444	0.16	8	Bench press	170.4	76.7	26	0	1	6
High pre-set velocity loss	2	Bench press: 0.45 ms$^{-1}$; Squat: 0.60 ms$^{-1}$	2	1	55.5556	0.2	5	Bench press	170.4	76.7	26	0	1	6
High pre-set velocity loss	2	Bench press: 0.45 ms$^{-1}$; Squat: 0.60 ms$^{-1}$	3	0	66.6667	0.15	5	Bench press	170.4	76.7	26	0	1	6
High pre-set velocity loss	2	Bench press: 0.38 ms$^{-1}$; Squat: 0.49 ms$^{-1}$	1	0	57.5	0.17	6	Bench press	170.4	76.7	26	0	1	6
High pre-set velocity loss	2	Bench press: 0.38 ms$^{-1}$; Squat: 0.49 ms$^{-1}$	2	0	72.5	0.11	5	Bench press	170.4	76.7	26	0	1	6
High pre-set velocity loss	2	Bench press: 0.38 ms$^{-1}$; Squat: 0.49 ms$^{-1}$	3	0	57.5	0.17	4	Bench press	170.4	76.7	26	0	1	6
High pre-set velocity loss	2	Bench press: 0.53 ms$^{-1}$; Squat: 0.70 ms$^{-1}$	1	0	56.6038	0.23	10	Bench press	170.4	76.7	26	0	1	6
High pre-set velocity loss	2	Bench press: 0.53 ms$^{-1}$; Squat: 0.70 ms$^{-1}$	2	1	62.2642	0.2	9	Bench press	170.4	76.7	26	0	1	6
High pre-set velocity loss	2	Bench press: 0.53 ms$^{-1}$; Squat: 0.70 ms$^{-1}$	3	0	67.9245	0.17	6	Bench press	170.4	76.7	26	0	1	6
High pre-set velocity loss	3	Bench press: 0.45 ms$^{-1}$; Squat: 0.60 ms$^{-1}$	1	1	46.6667	0.24	8	Bench press	170.4	76.7	26	0	1	6
High pre-set velocity loss	3	Bench press: 0.45 ms$^{-1}$; Squat: 0.60 ms$^{-1}$	2	0	73.3333	0.12	8	Bench press	170.4	76.7	26	0	1	6
High pre-set velocity loss	3	Bench press: 0.45 ms$^{-1}$; Squat: 0.60 ms$^{-1}$	3	1	60	0.18	4	Bench press	170.4	76.7	26	0	1	6
High pre-set velocity loss	3	Bench press: 0.38 ms$^{-1}$; Squat: 0.49 ms$^{-1}$	1	0	71.0526	0.11	8	Bench press	170.4	76.7	26	0	1	6
High pre-set velocity loss	3	Bench press: 0.38 ms$^{-1}$; Squat: 0.49 ms$^{-1}$	2	0	73.6842	0.1	6	Bench press	170.4	76.7	26	0	1	6
High pre-set velocity loss	3	Bench press: 0.53 ms$^{-1}$; Squat: 0.70 ms$^{-1}$	1	0	71.1538	0.15	14	Bench press	170.4	76.7	26	0	1	6
High pre-set velocity loss	3	Bench press: 0.53 ms$^{-1}$; Squat: 0.70 ms$^{-1}$	2	1	53.8462	0.24	8	Bench press	170.4	76.7	26	0	1	6
High pre-set velocity loss	3	Bench press: 0.53 ms$^{-1}$; Squat: 0.70 ms$^{-1}$	3	0	55.7692	0.23	8	Bench press	170.4	76.7	26	0	1	6
Low pre-set velocity loss	1	Bench press: 0.45 ms$^{-1}$; Squat: 0.60 ms$^{-1}$	1	3	29.1667	0.51	12	Squat	170.4	76.7	26	0	1	6
Low pre-set velocity loss	1	Bench press: 0.45 ms$^{-1}$; Squat: 0.60 ms$^{-1}$	2	4	20.8333	0.57	8	Squat	170.4	76.7	26	0	1	6
Low pre-set velocity loss	1	Bench press: 0.38 ms$^{-1}$; Squat: 0.49 ms$^{-1}$	1	2	20	0.4	7	Squat	170.4	76.7	26	0	1	6
Low pre-set velocity loss	1	Bench press: 0.38 ms$^{-1}$; Squat: 0.49 ms$^{-1}$	2	3	6	0.47	6	Squat	170.4	76.7	26	0	1	6
Low pre-set velocity loss	2	Bench press: 0.45 ms$^{-1}$; Squat: 0.60 ms$^{-1}$	1	2	19.6721	0.49	4	Squat	170.4	76.7	26	0	1	6
Low pre-set velocity loss	2	Bench press: 0.45 ms$^{-1}$; Squat: 0.60 ms$^{-1}$	2	3	22.9508	0.47	3	Squat	170.4	76.7	26	0	1	6
Low pre-set velocity loss	2	Bench press: 0.45 ms$^{-1}$; Squat: 0.60 ms$^{-1}$	3	3	19.6721	0.49	4	Squat	170.4	76.7	26	0	1	6
Low pre-set velocity loss	2	Bench press: 0.45 ms$^{-1}$; Squat: 0.60 ms$^{-1}$	4	3	19.6721	0.49	2	Squat	170.4	76.7	26	0	1	6
Low pre-set velocity loss	2	Bench press: 0.45 ms$^{-1}$; Squat: 0.60 ms$^{-1}$	5	2	22.9508	0.47	5	Squat	170.4	76.7	26	0	1	6
Low pre-set velocity loss	2	Bench press: 0.45 ms$^{-1}$; Squat: 0.60 ms$^{-1}$	6	2	21.3115	0.48	3	Squat	170.4	76.7	26	0	1	6
Low pre-set velocity loss	2	Bench press: 0.38 ms$^{-1}$; Squat: 0.49 ms$^{-1}$	1	2	20	0.4	5	Squat	170.4	76.7	26	0	1	6
Low pre-set velocity loss	2	Bench press: 0.38 ms$^{-1}$; Squat: 0.49 ms$^{-1}$	2	2	18	0.41	5	Squat	170.4	76.7	26	0	1	6
Low pre-set velocity loss	2	Bench press: 0.38 ms$^{-1}$; Squat: 0.49 ms$^{-1}$	3	3	18	0.41	3	Squat	170.4	76.7	26	0	1	6
Low pre-set velocity loss	2	Bench press: 0.53 ms$^{-1}$; Squat: 0.70 ms$^{-1}$	2	3	17.9104	0.55	7	Squat	170.4	76.7	26	0	1	6
Low pre-set velocity loss	2	Bench press: 0.53 ms$^{-1}$; Squat: 0.70 ms$^{-1}$	3	3	22.3881	0.52	7	Squat	170.4	76.7	26	0	1	6
Low pre-set velocity loss	3	Bench press: 0.45 ms$^{-1}$; Squat: 0.60 ms$^{-1}$	1	3	19.2982	0.46	5	Squat	170.4	76.7	26	0	1	6
Low pre-set velocity loss	3	Bench press: 0.45 ms$^{-1}$; Squat: 0.60 ms$^{-1}$	2	3	21.0526	0.45	5	Squat	170.4	76.7	26	0	1	6
Low pre-set velocity loss	3	Bench press: 0.38 ms$^{-1}$; Squat: 0.49 ms$^{-1}$	1	2	18.75	0.39	2	Squat	170.4	76.7	26	0	1	6
Low pre-set velocity loss	3	Bench press: 0.38 ms$^{-1}$; Squat: 0.49 ms$^{-1}$	2	2	16.6667	0.4	3	Squat	170.4	76.7	26	0	1	6
Low pre-set velocity loss	3	Bench press: 0.38 ms$^{-1}$; Squat: 0.49 ms$^{-1}$	3	3	18.75	0.39	3	Squat	170.4	76.7	26	0	1	6
Low pre-set velocity loss	3	Bench press: 0.38 ms$^{-1}$; Squat: 0.49 ms$^{-1}$	4	3	22.9167	0.37	4	Squat	170.4	76.7	26	0	1	6
Low pre-set velocity loss	3	Bench press: 0.38 ms$^{-1}$; Squat: 0.49 ms$^{-1}$	5	2	33.3333	0.32	3	Squat	170.4	76.7	26	0	1	6
Low pre-set velocity loss	4	Bench press: 0.45 ms$^{-1}$; Squat: 0.60 ms$^{-1}$	1	3	25.3968	0.47	7	Squat	170.4	76.7	26	0	1	6
Low pre-set velocity loss	4	Bench press: 0.45 ms$^{-1}$; Squat: 0.60 ms$^{-1}$	2	3	22.2222	0.49	6	Squat	170.4	76.7	26	0	1	6
Low pre-set velocity loss	4	Bench press: 0.38 ms$^{-1}$; Squat: 0.49 ms$^{-1}$	1	2	18.75	0.39	3	Squat	170.4	76.7	26	0	1	6
Low pre-set velocity loss	4	Bench press: 0.38 ms$^{-1}$; Squat: 0.49 ms$^{-1}$	2	1	20.8333	0.38	6	Squat	170.4	76.7	26	0	1	6
Low pre-set velocity loss	4	Bench press: 0.53 ms$^{-1}$; Squat: 0.70 ms$^{-1}$	2	4	17.1429	0.58	7	Squat	170.4	76.7	26	0	1	6
Low pre-set velocity loss	4	Bench press: 0.53 ms$^{-1}$; Squat: 0.70 ms$^{-1}$	3	3	20	0.56	7	Squat	170.4	76.7	26	0	1	6
Low pre-set velocity loss	5	Bench press: 0.45 ms$^{-1}$; Squat: 0.60 ms$^{-1}$	1	3	20.9677	0.49	5	Squat	170.4	76.7	26	0	1	6
Low pre-set velocity loss	5	Bench press: 0.45 ms$^{-1}$; Squat: 0.60 ms$^{-1}$	2	3	20.9677	0.49	5	Squat	170.4	76.7	26	0	1	6
Low pre-set velocity loss	5	Bench press: 0.45 ms$^{-1}$; Squat: 0.60 ms$^{-1}$	3	4	20.9677	0.49	4	Squat	170.4	76.7	26	0	1	6
Low pre-set velocity loss	5	Bench press: 0.45 ms$^{-1}$; Squat: 0.60 ms$^{-1}$	4	4	22.5806	0.48	3	Squat	170.4	76.7	26	0	1	6
Low pre-set velocity loss	5	Bench press: 0.45 ms$^{-1}$; Squat: 0.60 ms$^{-1}$	5	3	20.9677	0.49	3	Squat	170.4	76.7	26	0	1	6
Low pre-set velocity loss	5	Bench press: 0.38 ms$^{-1}$; Squat: 0.49 ms$^{-1}$	1	4	18	0.41	6	Squat	170.4	76.7	26	0	1	6
Low pre-set velocity loss	5	Bench press: 0.38 ms$^{-1}$; Squat: 0.49 ms$^{-1}$	3	3	26	0.37	7	Squat	170.4	76.7	26	0	1	6
Low pre-set velocity loss	5	Bench press: 0.53 ms$^{-1}$; Squat: 0.70 ms$^{-1}$	1	4	24.3243	0.56	5	Squat	170.4	76.7	26	0	1	6
Low pre-set velocity loss	5	Bench press: 0.53 ms$^{-1}$; Squat: 0.70 ms$^{-1}$	2	4	24.3243	0.56	7	Squat	170.4	76.7	26	0	1	6
Low pre-set velocity loss	5	Bench press: 0.53 ms$^{-1}$; Squat: 0.70 ms$^{-1}$	3	3	27.027	0.54	8	Squat	170.4	76.7	26	0	1	6
Low pre-set velocity loss	5	Bench press: 0.53 ms$^{-1}$; Squat: 0.70 ms$^{-1}$	4	3	22.973	0.57	7	Squat	170.4	76.7	26	0	1	6
Low pre-set velocity loss	6	Bench press: 0.45 ms$^{-1}$; Squat: 0.60 ms$^{-1}$	1	3	24.1935	0.47	6	Squat	170.4	76.7	26	0	1	6
Low pre-set velocity loss	6	Bench press: 0.45 ms$^{-1}$; Squat: 0.60 ms$^{-1}$	2	2	20.9677	0.49	6	Squat	170.4	76.7	26	0	1	6
Low pre-set velocity loss	6	Bench press: 0.45 ms$^{-1}$; Squat: 0.60 ms$^{-1}$	3	2	19.3548	0.5	5	Squat	170.4	76.7	26	0	1	6
Low pre-set velocity loss	6	Bench press: 0.45 ms$^{-1}$; Squat: 0.60 ms$^{-1}$	4	4	22.5806	0.48	2	Squat	170.4	76.7	26	0	1	6
Low pre-set velocity loss	6	Bench press: 0.45 ms$^{-1}$; Squat: 0.60 ms$^{-1}$	5	2	12.9032	0.54	4	Squat	170.4	76.7	26	0	1	6
High pre-set velocity loss	1	Bench press: 0.45 ms$^{-1}$; Squat: 0.60 ms$^{-1}$	1	3	36.9863	0.46	15	Squat	170.4	76.7	26	0	1	6
High pre-set velocity loss	1	Bench press: 0.45 ms$^{-1}$; Squat: 0.60 ms$^{-1}$	2	2	34.2466	0.48	14	Squat	170.4	76.7	26	0	1	6
High pre-set velocity loss	1	Bench press: 0.38 ms$^{-1}$; Squat: 0.49 ms$^{-1}$	1	0	30.6122	0.34	7	Squat	170.4	76.7	26	0	1	6
High pre-set velocity loss	1	Bench press: 0.38 ms$^{-1}$; Squat: 0.49 ms$^{-1}$	2	0	20.4082	0.39	3	Squat	170.4	76.7	26	0	1	6
High pre-set velocity loss	1	Bench press: 0.53 ms$^{-1}$; Squat: 0.70 ms$^{-1}$	1	2	35.2941	0.44	11	Squat	170.4	76.7	26	0	1	6
High pre-set velocity loss	1	Bench press: 0.53 ms$^{-1}$; Squat: 0.70 ms$^{-1}$	2	2	39.7059	0.41	12	Squat	170.4	76.7	26	0	1	6
High pre-set velocity loss	2	Bench press: 0.45 ms$^{-1}$; Squat: 0.60 ms$^{-1}$	1	2	35.9375	0.41	12	Squat	170.4	76.7	26	0	1	6
High pre-set velocity loss	2	Bench press: 0.45 ms$^{-1}$; Squat: 0.60 ms$^{-1}$	2	1	35.9375	0.41	10	Squat	170.4	76.7	26	0	1	6
High pre-set velocity loss	2	Bench press: 0.45 ms$^{-1}$; Squat: 0.60 ms$^{-1}$	3	0	50	0.32	9	Squat	170.4	76.7	26	0	1	6
High pre-set velocity loss	2	Bench press: 0.38 ms$^{-1}$; Squat: 0.49 ms$^{-1}$	1	0	31.25	0.33	7	Squat	170.4	76.7	26	0	1	6
High pre-set velocity loss	2	Bench press: 0.38 ms$^{-1}$; Squat: 0.49 ms$^{-1}$	2	0	60.4167	0.19	4	Squat	170.4	76.7	26	0	1	6
High pre-set velocity loss	2	Bench press: 0.38 ms$^{-1}$; Squat: 0.49 ms$^{-1}$	3	0	25	0.36	5	Squat	170.4	76.7	26	0	1	6
High pre-set velocity loss	2	Bench press: 0.53 ms$^{-1}$; Squat: 0.70 ms$^{-1}$	1	1	41.6667	0.42	14	Squat	170.4	76.7	26	0	1	6
High pre-set velocity loss	2	Bench press: 0.53 ms$^{-1}$; Squat: 0.70 ms$^{-1}$	2	0	43.0556	0.41	13	Squat	170.4	76.7	26	0	1	6
High pre-set velocity loss	2	Bench press: 0.53 ms$^{-1}$; Squat: 0.70 ms$^{-1}$	3	1	43.0556	0.41	10	Squat	170.4	76.7	26	0	1	6
High pre-set velocity loss	3	Bench press: 0.45 ms$^{-1}$; Squat: 0.60 ms$^{-1}$	1	1	42.3729	0.34	11	Squat	170.4	76.7	26	0	1	6
High pre-set velocity loss	3	Bench press: 0.45 ms$^{-1}$; Squat: 0.60 ms$^{-1}$	2	0	42.3729	0.34	9	Squat	170.4	76.7	26	0	1	6
High pre-set velocity loss	3	Bench press: 0.45 ms$^{-1}$; Squat: 0.60 ms$^{-1}$	3	1	38.9831	0.36	8	Squat	170.4	76.7	26	0	1	6
High pre-set velocity loss	3	Bench press: 0.38 ms$^{-1}$; Squat: 0.49 ms$^{-1}$	1	0	37.5	0.3	7	Squat	170.4	76.7	26	0	1	6
High pre-set velocity loss	3	Bench press: 0.38 ms$^{-1}$; Squat: 0.49 ms$^{-1}$	2	0	43.75	0.27	8	Squat	170.4	76.7	26	0	1	6
High pre-set velocity loss	3	Bench press: 0.38 ms$^{-1}$; Squat: 0.49 ms$^{-1}$	3	0	50	0.24	5	Squat	170.4	76.7	26	0	1	6
High pre-set velocity loss	3	Bench press: 0.53 ms$^{-1}$; Squat: 0.70 ms$^{-1}$	1	1	40.2985	0.4	14	Squat	170.4	76.7	26	0	1	6
High pre-set velocity loss	3	Bench press: 0.53 ms$^{-1}$; Squat: 0.70 ms$^{-1}$	2	0	46.2687	0.36	13	Squat	170.4	76.7	26	0	1	6
High pre-set velocity loss	3	Bench press: 0.53 ms$^{-1}$; Squat: 0.70 ms$^{-1}$	3	1	37.3134	0.42	11	Squat	170.4	76.7	26	0	1	6
High pre-set velocity loss	1	Bench press: 0.45 ms$^{-1}$; Squat: 0.60 ms$^{-1}$	1	2	55.3191	0.21	9	Bench press	170.5	73.8	30	1	1	7
High pre-set velocity loss	1	Bench press: 0.45 ms$^{-1}$; Squat: 0.60 ms$^{-1}$	2	1	59.5745	0.19	8	Bench press	170.5	73.8	30	1	1	7
High pre-set velocity loss	1	Bench press: 0.38 ms$^{-1}$; Squat: 0.49 ms$^{-1}$	1	1	47.3684	0.2	4	Bench press	170.5	73.8	30	1	1	7
High pre-set velocity loss	1	Bench press: 0.38 ms$^{-1}$; Squat: 0.49 ms$^{-1}$	2	1	52.6316	0.18	4	Bench press	170.5	73.8	30	1	1	7
High pre-set velocity loss	1	Bench press: 0.53 ms$^{-1}$; Squat: 0.70 ms$^{-1}$	1	1	62	0.19	10	Bench press	170.5	73.8	30	1	1	7
High pre-set velocity loss	1	Bench press: 0.53 ms$^{-1}$; Squat: 0.70 ms$^{-1}$	2	0	66	0.17	9	Bench press	170.5	73.8	30	1	1	7
High pre-set velocity loss	2	Bench press: 0.45 ms$^{-1}$; Squat: 0.60 ms$^{-1}$	1	2	56.5217	0.2	9	Bench press	170.5	73.8	30	1	1	7
High pre-set velocity loss	2	Bench press: 0.45 ms$^{-1}$; Squat: 0.60 ms$^{-1}$	2	2	65.2174	0.16	7	Bench press	170.5	73.8	30	1	1	7
High pre-set velocity loss	2	Bench press: 0.45 ms$^{-1}$; Squat: 0.60 ms$^{-1}$	3	2	65.2174	0.16	6	Bench press	170.5	73.8	30	1	1	7
High pre-set velocity loss	2	Bench press: 0.38 ms$^{-1}$; Squat: 0.49 ms$^{-1}$	1	2	63.0435	0.17	5	Bench press	170.5	73.8	30	1	1	7
High pre-set velocity loss	2	Bench press: 0.38 ms$^{-1}$; Squat: 0.49 ms$^{-1}$	2	1	39.1304	0.28	5	Bench press	170.5	73.8	30	1	1	7
High pre-set velocity loss	2	Bench press: 0.38 ms$^{-1}$; Squat: 0.49 ms$^{-1}$	3	2	39.1304	0.28	4	Bench press	170.5	73.8	30	1	1	7
High pre-set velocity loss	2	Bench press: 0.53 ms$^{-1}$; Squat: 0.70 ms$^{-1}$	1	2	60.7143	0.22	11	Bench press	170.5	73.8	30	1	1	7
High pre-set velocity loss	2	Bench press: 0.53 ms$^{-1}$; Squat: 0.70 ms$^{-1}$	2	2	55.3571	0.25	10	Bench press	170.5	73.8	30	1	1	7
High pre-set velocity loss	2	Bench press: 0.53 ms$^{-1}$; Squat: 0.70 ms$^{-1}$	3	1	64.2857	0.2	9	Bench press	170.5	73.8	30	1	1	7
High pre-set velocity loss	3	Bench press: 0.45 ms$^{-1}$; Squat: 0.60 ms$^{-1}$	1	2	64.4444	0.16	6	Bench press	170.5	73.8	30	1	1	7
High pre-set velocity loss	3	Bench press: 0.45 ms$^{-1}$; Squat: 0.60 ms$^{-1}$	2	2	46.6667	0.24	5	Bench press	170.5	73.8	30	1	1	7
High pre-set velocity loss	3	Bench press: 0.45 ms$^{-1}$; Squat: 0.60 ms$^{-1}$	3	1	66.6667	0.15	5	Bench press	170.5	73.8	30	1	1	7
High pre-set velocity loss	3	Bench press: 0.38 ms$^{-1}$; Squat: 0.49 ms$^{-1}$	1	1	63.1579	0.14	4	Bench press	170.5	73.8	30	1	1	7
High pre-set velocity loss	3	Bench press: 0.38 ms$^{-1}$; Squat: 0.49 ms$^{-1}$	2	1	39.4737	0.23	3	Bench press	170.5	73.8	30	1	1	7
High pre-set velocity loss	3	Bench press: 0.38 ms$^{-1}$; Squat: 0.49 ms$^{-1}$	3	1	47.3684	0.2	3	Bench press	170.5	73.8	30	1	1	7
High pre-set velocity loss	3	Bench press: 0.53 ms$^{-1}$; Squat: 0.70 ms$^{-1}$	1	2	52.8302	0.25	9	Bench press	170.5	73.8	30	1	1	7
High pre-set velocity loss	3	Bench press: 0.53 ms$^{-1}$; Squat: 0.70 ms$^{-1}$	2	2	56.6038	0.23	6	Bench press	170.5	73.8	30	1	1	7
High pre-set velocity loss	3	Bench press: 0.53 ms$^{-1}$; Squat: 0.70 ms$^{-1}$	3	2	67.9245	0.17	8	Bench press	170.5	73.8	30	1	1	7
High pre-set velocity loss	4	Bench press: 0.45 ms$^{-1}$; Squat: 0.60 ms$^{-1}$	1	2	56.8182	0.19	5	Bench press	170.5	73.8	30	1	1	7
High pre-set velocity loss	4	Bench press: 0.45 ms$^{-1}$; Squat: 0.60 ms$^{-1}$	2	2	56.8182	0.19	4	Bench press	170.5	73.8	30	1	1	7
High pre-set velocity loss	4	Bench press: 0.45 ms$^{-1}$; Squat: 0.60 ms$^{-1}$	3	1	59.0909	0.18	5	Bench press	170.5	73.8	30	1	1	7
High pre-set velocity loss	4	Bench press: 0.38 ms$^{-1}$; Squat: 0.49 ms$^{-1}$	1	2	53.6585	0.19	6	Bench press	170.5	73.8	30	1	1	7
High pre-set velocity loss	4	Bench press: 0.38 ms$^{-1}$; Squat: 0.49 ms$^{-1}$	2	0	73.1707	0.11	5	Bench press	170.5	73.8	30	1	1	7
High pre-set velocity loss	4	Bench press: 0.38 ms$^{-1}$; Squat: 0.49 ms$^{-1}$	3	1	46.3415	0.22	6	Bench press	170.5	73.8	30	1	1	7
High pre-set velocity loss	4	Bench press: 0.53 ms$^{-1}$; Squat: 0.70 ms$^{-1}$	1	2	59.5745	0.19	6	Bench press	170.5	73.8	30	1	1	7
High pre-set velocity loss	4	Bench press: 0.53 ms$^{-1}$; Squat: 0.70 ms$^{-1}$	2	1	53.1915	0.22	6	Bench press	170.5	73.8	30	1	1	7
High pre-set velocity loss	4	Bench press: 0.53 ms$^{-1}$; Squat: 0.70 ms$^{-1}$	3	0	61.7021	0.18	5	Bench press	170.5	73.8	30	1	1	7
High pre-set velocity loss	5	Bench press: 0.45 ms$^{-1}$; Squat: 0.60 ms$^{-1}$	1	1	59.5745	0.19	8	Bench press	170.5	73.8	30	1	1	7
High pre-set velocity loss	5	Bench press: 0.45 ms$^{-1}$; Squat: 0.60 ms$^{-1}$	2	1	68.0851	0.15	7	Bench press	170.5	73.8	30	1	1	7
High pre-set velocity loss	5	Bench press: 0.45 ms$^{-1}$; Squat: 0.60 ms$^{-1}$	3	1	51.0638	0.23	5	Bench press	170.5	73.8	30	1	1	7
High pre-set velocity loss	5	Bench press: 0.45 ms$^{-1}$; Squat: 0.60 ms$^{-1}$	4	1	61.7021	0.18	5	Bench press	170.5	73.8	30	1	1	7
High pre-set velocity loss	5	Bench press: 0.38 ms$^{-1}$; Squat: 0.49 ms$^{-1}$	1	2	48.5714	0.18	5	Bench press	170.5	73.8	30	1	1	7
High pre-set velocity loss	5	Bench press: 0.38 ms$^{-1}$; Squat: 0.49 ms$^{-1}$	2	0	60	0.14	6	Bench press	170.5	73.8	30	1	1	7
High pre-set velocity loss	5	Bench press: 0.38 ms$^{-1}$; Squat: 0.49 ms$^{-1}$	3	0	68.5714	0.11	4	Bench press	170.5	73.8	30	1	1	7
High pre-set velocity loss	5	Bench press: 0.38 ms$^{-1}$; Squat: 0.49 ms$^{-1}$	4	1	54.2857	0.16	3	Bench press	170.5	73.8	30	1	1	7
High pre-set velocity loss	5	Bench press: 0.53 ms$^{-1}$; Squat: 0.70 ms$^{-1}$	1	2	67.9245	0.17	9	Bench press	170.5	73.8	30	1	1	7
High pre-set velocity loss	5	Bench press: 0.53 ms$^{-1}$; Squat: 0.70 ms$^{-1}$	2	2	60.3774	0.21	8	Bench press	170.5	73.8	30	1	1	7
High pre-set velocity loss	5	Bench press: 0.53 ms$^{-1}$; Squat: 0.70 ms$^{-1}$	3	0	75.4717	0.13	8	Bench press	170.5	73.8	30	1	1	7
High pre-set velocity loss	5	Bench press: 0.53 ms$^{-1}$; Squat: 0.70 ms$^{-1}$	4	1	75.4717	0.13	8	Bench press	170.5	73.8	30	1	1	7
High pre-set velocity loss	6	Bench press: 0.45 ms$^{-1}$; Squat: 0.60 ms$^{-1}$	1	2	59.5745	0.19	7	Bench press	170.5	73.8	30	1	1	7
High pre-set velocity loss	6	Bench press: 0.45 ms$^{-1}$; Squat: 0.60 ms$^{-1}$	2	2	57.4468	0.2	7	Bench press	170.5	73.8	30	1	1	7
High pre-set velocity loss	6	Bench press: 0.45 ms$^{-1}$; Squat: 0.60 ms$^{-1}$	3	2	53.1915	0.22	6	Bench press	170.5	73.8	30	1	1	7
High pre-set velocity loss	6	Bench press: 0.45 ms$^{-1}$; Squat: 0.60 ms$^{-1}$	4	1	63.8298	0.17	5	Bench press	170.5	73.8	30	1	1	7
High pre-set velocity loss	6	Bench press: 0.38 ms$^{-1}$; Squat: 0.49 ms$^{-1}$	1	1	55.2632	0.17	4	Bench press	170.5	73.8	30	1	1	7
High pre-set velocity loss	6	Bench press: 0.38 ms$^{-1}$; Squat: 0.49 ms$^{-1}$	2	1	57.8947	0.16	5	Bench press	170.5	73.8	30	1	1	7
High pre-set velocity loss	6	Bench press: 0.38 ms$^{-1}$; Squat: 0.49 ms$^{-1}$	3	0	68.4211	0.12	4	Bench press	170.5	73.8	30	1	1	7
High pre-set velocity loss	6	Bench press: 0.38 ms$^{-1}$; Squat: 0.49 ms$^{-1}$	4	0	63.1579	0.14	4	Bench press	170.5	73.8	30	1	1	7
High pre-set velocity loss	6	Bench press: 0.53 ms$^{-1}$; Squat: 0.70 ms$^{-1}$	1	2	62.7451	0.19	8	Bench press	170.5	73.8	30	1	1	7
High pre-set velocity loss	6	Bench press: 0.53 ms$^{-1}$; Squat: 0.70 ms$^{-1}$	2	2	56.8627	0.22	7	Bench press	170.5	73.8	30	1	1	7
High pre-set velocity loss	6	Bench press: 0.53 ms$^{-1}$; Squat: 0.70 ms$^{-1}$	3	1	68.6275	0.16	7	Bench press	170.5	73.8	30	1	1	7
High pre-set velocity loss	6	Bench press: 0.53 ms$^{-1}$; Squat: 0.70 ms$^{-1}$	4	1	70.5882	0.15	6	Bench press	170.5	73.8	30	1	1	7
High pre-set velocity loss	1	Bench press: 0.45 ms$^{-1}$; Squat: 0.60 ms$^{-1}$	1	3	38.9831	0.36	7	Squat	170.5	73.8	30	1	1	7
High pre-set velocity loss	1	Bench press: 0.45 ms$^{-1}$; Squat: 0.60 ms$^{-1}$	2	2	40.678	0.35	7	Squat	170.5	73.8	30	1	1	7
High pre-set velocity loss	1	Bench press: 0.38 ms$^{-1}$; Squat: 0.49 ms$^{-1}$	1	2	42.3077	0.3	6	Squat	170.5	73.8	30	1	1	7
High pre-set velocity loss	1	Bench press: 0.38 ms$^{-1}$; Squat: 0.49 ms$^{-1}$	2	1	36.5385	0.33	6	Squat	170.5	73.8	30	1	1	7
High pre-set velocity loss	1	Bench press: 0.53 ms$^{-1}$; Squat: 0.70 ms$^{-1}$	1	2	40	0.42	9	Squat	170.5	73.8	30	1	1	7
High pre-set velocity loss	1	Bench press: 0.53 ms$^{-1}$; Squat: 0.70 ms$^{-1}$	2	2	47.1429	0.37	11	Squat	170.5	73.8	30	1	1	7
High pre-set velocity loss	2	Bench press: 0.45 ms$^{-1}$; Squat: 0.60 ms$^{-1}$	1	2	46.0317	0.34	9	Squat	170.5	73.8	30	1	1	7
High pre-set velocity loss	2	Bench press: 0.45 ms$^{-1}$; Squat: 0.60 ms$^{-1}$	2	2	46.0317	0.34	7	Squat	170.5	73.8	30	1	1	7
High pre-set velocity loss	2	Bench press: 0.45 ms$^{-1}$; Squat: 0.60 ms$^{-1}$	3	3	26.9841	0.46	4	Squat	170.5	73.8	30	1	1	7
High pre-set velocity loss	2	Bench press: 0.38 ms$^{-1}$; Squat: 0.49 ms$^{-1}$	1	3	27.7778	0.39	4	Squat	170.5	73.8	30	1	1	7
High pre-set velocity loss	2	Bench press: 0.38 ms$^{-1}$; Squat: 0.49 ms$^{-1}$	2	2	48.1481	0.28	4	Squat	170.5	73.8	30	1	1	7
High pre-set velocity loss	2	Bench press: 0.38 ms$^{-1}$; Squat: 0.49 ms$^{-1}$	3	1	42.5926	0.31	3	Squat	170.5	73.8	30	1	1	7
High pre-set velocity loss	2	Bench press: 0.53 ms$^{-1}$; Squat: 0.70 ms$^{-1}$	1	3	44.7761	0.37	9	Squat	170.5	73.8	30	1	1	7
High pre-set velocity loss	2	Bench press: 0.53 ms$^{-1}$; Squat: 0.70 ms$^{-1}$	2	3	35.8209	0.43	6	Squat	170.5	73.8	30	1	1	7
High pre-set velocity loss	2	Bench press: 0.53 ms$^{-1}$; Squat: 0.70 ms$^{-1}$	3	2	38.806	0.41	7	Squat	170.5	73.8	30	1	1	7
High pre-set velocity loss	3	Bench press: 0.45 ms$^{-1}$; Squat: 0.60 ms$^{-1}$	1	3	39.6552	0.35	7	Squat	170.5	73.8	30	1	1	7
High pre-set velocity loss	3	Bench press: 0.45 ms$^{-1}$; Squat: 0.60 ms$^{-1}$	2	3	43.1034	0.33	5	Squat	170.5	73.8	30	1	1	7
High pre-set velocity loss	3	Bench press: 0.45 ms$^{-1}$; Squat: 0.60 ms$^{-1}$	3	2	43.1034	0.33	5	Squat	170.5	73.8	30	1	1	7
High pre-set velocity loss	3	Bench press: 0.38 ms$^{-1}$; Squat: 0.49 ms$^{-1}$	1	2	46	0.27	4	Squat	170.5	73.8	30	1	1	7
High pre-set velocity loss	3	Bench press: 0.38 ms$^{-1}$; Squat: 0.49 ms$^{-1}$	2	1	44	0.28	3	Squat	170.5	73.8	30	1	1	7
High pre-set velocity loss	3	Bench press: 0.38 ms$^{-1}$; Squat: 0.49 ms$^{-1}$	3	1	34	0.33	2	Squat	170.5	73.8	30	1	1	7
High pre-set velocity loss	3	Bench press: 0.53 ms$^{-1}$; Squat: 0.70 ms$^{-1}$	1	3	37.3333	0.47	9	Squat	170.5	73.8	30	1	1	7
High pre-set velocity loss	3	Bench press: 0.53 ms$^{-1}$; Squat: 0.70 ms$^{-1}$	2	3	42.6667	0.43	10	Squat	170.5	73.8	30	1	1	7
High pre-set velocity loss	3	Bench press: 0.53 ms$^{-1}$; Squat: 0.70 ms$^{-1}$	3	2	45.3333	0.41	9	Squat	170.5	73.8	30	1	1	7
High pre-set velocity loss	4	Bench press: 0.45 ms$^{-1}$; Squat: 0.60 ms$^{-1}$	1	3	42.623	0.35	7	Squat	170.5	73.8	30	1	1	7
High pre-set velocity loss	4	Bench press: 0.45 ms$^{-1}$; Squat: 0.60 ms$^{-1}$	2	3	42.623	0.35	6	Squat	170.5	73.8	30	1	1	7
High pre-set velocity loss	4	Bench press: 0.45 ms$^{-1}$; Squat: 0.60 ms$^{-1}$	3	2	42.623	0.35	4	Squat	170.5	73.8	30	1	1	7
High pre-set velocity loss	4	Bench press: 0.38 ms$^{-1}$; Squat: 0.49 ms$^{-1}$	1	2	33.3333	0.3	3	Squat	170.5	73.8	30	1	1	7
High pre-set velocity loss	4	Bench press: 0.38 ms$^{-1}$; Squat: 0.49 ms$^{-1}$	2	1	44.4444	0.25	3	Squat	170.5	73.8	30	1	1	7
High pre-set velocity loss	4	Bench press: 0.38 ms$^{-1}$; Squat: 0.49 ms$^{-1}$	3	1	24.4444	0.34	3	Squat	170.5	73.8	30	1	1	7
High pre-set velocity loss	4	Bench press: 0.53 ms$^{-1}$; Squat: 0.70 ms$^{-1}$	1	4	44.7761	0.37	10	Squat	170.5	73.8	30	1	1	7
High pre-set velocity loss	4	Bench press: 0.53 ms$^{-1}$; Squat: 0.70 ms$^{-1}$	2	3	37.3134	0.42	7	Squat	170.5	73.8	30	1	1	7
High pre-set velocity loss	4	Bench press: 0.53 ms$^{-1}$; Squat: 0.70 ms$^{-1}$	3	3	37.3134	0.42	8	Squat	170.5	73.8	30	1	1	7
High pre-set velocity loss	5	Bench press: 0.45 ms$^{-1}$; Squat: 0.60 ms$^{-1}$	1	2	41.3793	0.34	6	Squat	170.5	73.8	30	1	1	7
High pre-set velocity loss	5	Bench press: 0.45 ms$^{-1}$; Squat: 0.60 ms$^{-1}$	2	3	46.5517	0.31	6	Squat	170.5	73.8	30	1	1	7
High pre-set velocity loss	5	Bench press: 0.45 ms$^{-1}$; Squat: 0.60 ms$^{-1}$	3	2	41.3793	0.34	5	Squat	170.5	73.8	30	1	1	7
High pre-set velocity loss	5	Bench press: 0.45 ms$^{-1}$; Squat: 0.60 ms$^{-1}$	4	2	36.2069	0.37	4	Squat	170.5	73.8	30	1	1	7
High pre-set velocity loss	5	Bench press: 0.38 ms$^{-1}$; Squat: 0.49 ms$^{-1}$	1	2	34.0426	0.31	4	Squat	170.5	73.8	30	1	1	7
High pre-set velocity loss	5	Bench press: 0.38 ms$^{-1}$; Squat: 0.49 ms$^{-1}$	2	1	34.0426	0.31	3	Squat	170.5	73.8	30	1	1	7
High pre-set velocity loss	5	Bench press: 0.38 ms$^{-1}$; Squat: 0.49 ms$^{-1}$	3	1	40.4255	0.28	2	Squat	170.5	73.8	30	1	1	7
High pre-set velocity loss	5	Bench press: 0.38 ms$^{-1}$; Squat: 0.49 ms$^{-1}$	4	1	42.5532	0.27	5	Squat	170.5	73.8	30	1	1	7
High pre-set velocity loss	5	Bench press: 0.53 ms$^{-1}$; Squat: 0.70 ms$^{-1}$	1	3	37.3134	0.42	10	Squat	170.5	73.8	30	1	1	7
High pre-set velocity loss	5	Bench press: 0.53 ms$^{-1}$; Squat: 0.70 ms$^{-1}$	2	2	40.2985	0.4	9	Squat	170.5	73.8	30	1	1	7
High pre-set velocity loss	5	Bench press: 0.53 ms$^{-1}$; Squat: 0.70 ms$^{-1}$	3	2	37.3134	0.42	6	Squat	170.5	73.8	30	1	1	7
High pre-set velocity loss	5	Bench press: 0.53 ms$^{-1}$; Squat: 0.70 ms$^{-1}$	4	2	43.2836	0.38	8	Squat	170.5	73.8	30	1	1	7
High pre-set velocity loss	6	Bench press: 0.45 ms$^{-1}$; Squat: 0.60 ms$^{-1}$	1	3	52.5424	0.28	9	Squat	170.5	73.8	30	1	1	7
High pre-set velocity loss	6	Bench press: 0.45 ms$^{-1}$; Squat: 0.60 ms$^{-1}$	2	2	40.678	0.35	6	Squat	170.5	73.8	30	1	1	7
High pre-set velocity loss	6	Bench press: 0.45 ms$^{-1}$; Squat: 0.60 ms$^{-1}$	3	2	55.9322	0.26	6	Squat	170.5	73.8	30	1	1	7
High pre-set velocity loss	6	Bench press: 0.45 ms$^{-1}$; Squat: 0.60 ms$^{-1}$	4	2	30.5085	0.41	4	Squat	170.5	73.8	30	1	1	7
High pre-set velocity loss	6	Bench press: 0.38 ms$^{-1}$; Squat: 0.49 ms$^{-1}$	1	1	50	0.26	5	Squat	170.5	73.8	30	1	1	7
High pre-set velocity loss	6	Bench press: 0.38 ms$^{-1}$; Squat: 0.49 ms$^{-1}$	2	1	53.8462	0.24	4	Squat	170.5	73.8	30	1	1	7
High pre-set velocity loss	6	Bench press: 0.38 ms$^{-1}$; Squat: 0.49 ms$^{-1}$	3	1	34.6154	0.34	3	Squat	170.5	73.8	30	1	1	7
High pre-set velocity loss	6	Bench press: 0.38 ms$^{-1}$; Squat: 0.49 ms$^{-1}$	4	2	28.8462	0.37	2	Squat	170.5	73.8	30	1	1	7
High pre-set velocity loss	6	Bench press: 0.53 ms$^{-1}$; Squat: 0.70 ms$^{-1}$	1	2	49.2537	0.34	9	Squat	170.5	73.8	30	1	1	7
High pre-set velocity loss	6	Bench press: 0.53 ms$^{-1}$; Squat: 0.70 ms$^{-1}$	2	2	41.791	0.39	7	Squat	170.5	73.8	30	1	1	7
High pre-set velocity loss	6	Bench press: 0.53 ms$^{-1}$; Squat: 0.70 ms$^{-1}$	3	2	61.194	0.26	8	Squat	170.5	73.8	30	1	1	7
High pre-set velocity loss	6	Bench press: 0.53 ms$^{-1}$; Squat: 0.70 ms$^{-1}$	4	2	28.3582	0.48	5	Squat	170.5	73.8	30	1	1	7
Low pre-set velocity loss	1	Bench press: 0.45 ms$^{-1}$; Squat: 0.60 ms$^{-1}$	1	3	26.5306	0.36	7	Bench press	170.6	65.7	23	1	1	8
Low pre-set velocity loss	1	Bench press: 0.45 ms$^{-1}$; Squat: 0.60 ms$^{-1}$	2	3	30.6122	0.34	7	Bench press	170.6	65.7	23	1	1	8
Low pre-set velocity loss	1	Bench press: 0.38 ms$^{-1}$; Squat: 0.49 ms$^{-1}$	1	3	30.7692	0.27	5	Bench press	170.6	65.7	23	1	1	8
Low pre-set velocity loss	1	Bench press: 0.38 ms$^{-1}$; Squat: 0.49 ms$^{-1}$	2	2	35.8974	0.25	5	Bench press	170.6	65.7	23	1	1	8
Low pre-set velocity loss	1	Bench press: 0.53 ms$^{-1}$; Squat: 0.70 ms$^{-1}$	2	4	37.7358	0.33	10	Bench press	170.6	65.7	23	1	1	8
Low pre-set velocity loss	2	Bench press: 0.45 ms$^{-1}$; Squat: 0.60 ms$^{-1}$	2	4	28	0.36	7	Bench press	170.6	65.7	23	1	1	8
Low pre-set velocity loss	2	Bench press: 0.38 ms$^{-1}$; Squat: 0.49 ms$^{-1}$	1	3	34.2105	0.25	4	Bench press	170.6	65.7	23	1	1	8
Low pre-set velocity loss	2	Bench press: 0.38 ms$^{-1}$; Squat: 0.49 ms$^{-1}$	2	2	26.3158	0.28	3	Bench press	170.6	65.7	23	1	1	8
Low pre-set velocity loss	2	Bench press: 0.38 ms$^{-1}$; Squat: 0.49 ms$^{-1}$	3	2	28.9474	0.27	4	Bench press	170.6	65.7	23	1	1	8
Low pre-set velocity loss	2	Bench press: 0.38 ms$^{-1}$; Squat: 0.49 ms$^{-1}$	4	2	47.3684	0.2	4	Bench press	170.6	65.7	23	1	1	8
Low pre-set velocity loss	2	Bench press: 0.53 ms$^{-1}$; Squat: 0.70 ms$^{-1}$	2	4	29.4118	0.36	6	Bench press	170.6	65.7	23	1	1	8
Low pre-set velocity loss	2	Bench press: 0.53 ms$^{-1}$; Squat: 0.70 ms$^{-1}$	3	3	31.3725	0.35	6	Bench press	170.6	65.7	23	1	1	8
Low pre-set velocity loss	2	Bench press: 0.53 ms$^{-1}$; Squat: 0.70 ms$^{-1}$	4	4	23.5294	0.39	5	Bench press	170.6	65.7	23	1	1	8
Low pre-set velocity loss	2	Bench press: 0.53 ms$^{-1}$; Squat: 0.70 ms$^{-1}$	5	4	27.451	0.37	5	Bench press	170.6	65.7	23	1	1	8
Low pre-set velocity loss	3	Bench press: 0.45 ms$^{-1}$; Squat: 0.60 ms$^{-1}$	1	4	25.5319	0.35	8	Bench press	170.6	65.7	23	1	1	8
Low pre-set velocity loss	3	Bench press: 0.45 ms$^{-1}$; Squat: 0.60 ms$^{-1}$	2	3	38.2979	0.29	9	Bench press	170.6	65.7	23	1	1	8
Low pre-set velocity loss	3	Bench press: 0.38 ms$^{-1}$; Squat: 0.49 ms$^{-1}$	1	3	25.7143	0.26	3	Bench press	170.6	65.7	23	1	1	8
Low pre-set velocity loss	3	Bench press: 0.38 ms$^{-1}$; Squat: 0.49 ms$^{-1}$	2	3	20	0.28	2	Bench press	170.6	65.7	23	1	1	8
Low pre-set velocity loss	3	Bench press: 0.38 ms$^{-1}$; Squat: 0.49 ms$^{-1}$	3	3	22.8571	0.27	2	Bench press	170.6	65.7	23	1	1	8
Low pre-set velocity loss	3	Bench press: 0.38 ms$^{-1}$; Squat: 0.49 ms$^{-1}$	4	3	20	0.28	2	Bench press	170.6	65.7	23	1	1	8
Low pre-set velocity loss	3	Bench press: 0.38 ms$^{-1}$; Squat: 0.49 ms$^{-1}$	5	2	51.4286	0.17	3	Bench press	170.6	65.7	23	1	1	8
Low pre-set velocity loss	3	Bench press: 0.53 ms$^{-1}$; Squat: 0.70 ms$^{-1}$	3	4	30.7692	0.36	7	Bench press	170.6	65.7	23	1	1	8
Low pre-set velocity loss	3	Bench press: 0.53 ms$^{-1}$; Squat: 0.70 ms$^{-1}$	4	3	42.3077	0.3	6	Bench press	170.6	65.7	23	1	1	8
Low pre-set velocity loss	3	Bench press: 0.53 ms$^{-1}$; Squat: 0.70 ms$^{-1}$	5	3	44.2308	0.29	6	Bench press	170.6	65.7	23	1	1	8
Low pre-set velocity loss	4	Bench press: 0.38 ms$^{-1}$; Squat: 0.49 ms$^{-1}$	1	3	21.6216	0.29	3	Bench press	170.6	65.7	23	1	1	8
Low pre-set velocity loss	4	Bench press: 0.38 ms$^{-1}$; Squat: 0.49 ms$^{-1}$	2	2	27.027	0.27	4	Bench press	170.6	65.7	23	1	1	8
Low pre-set velocity loss	4	Bench press: 0.38 ms$^{-1}$; Squat: 0.49 ms$^{-1}$	3	2	32.4324	0.25	3	Bench press	170.6	65.7	23	1	1	8
Low pre-set velocity loss	4	Bench press: 0.53 ms$^{-1}$; Squat: 0.70 ms$^{-1}$	1	4	30	0.35	7	Bench press	170.6	65.7	23	1	1	8
Low pre-set velocity loss	4	Bench press: 0.53 ms$^{-1}$; Squat: 0.70 ms$^{-1}$	2	4	34	0.33	6	Bench press	170.6	65.7	23	1	1	8
Low pre-set velocity loss	4	Bench press: 0.53 ms$^{-1}$; Squat: 0.70 ms$^{-1}$	3	4	42	0.29	4	Bench press	170.6	65.7	23	1	1	8
Low pre-set velocity loss	4	Bench press: 0.53 ms$^{-1}$; Squat: 0.70 ms$^{-1}$	4	4	34	0.33	3	Bench press	170.6	65.7	23	1	1	8
Low pre-set velocity loss	4	Bench press: 0.53 ms$^{-1}$; Squat: 0.70 ms$^{-1}$	5	4	20	0.4	4	Bench press	170.6	65.7	23	1	1	8
Low pre-set velocity loss	5	Bench press: 0.45 ms$^{-1}$; Squat: 0.60 ms$^{-1}$	1	4	33.3333	0.32	7	Bench press	170.6	65.7	23	1	1	8
Low pre-set velocity loss	5	Bench press: 0.45 ms$^{-1}$; Squat: 0.60 ms$^{-1}$	2	4	27.0833	0.35	6	Bench press	170.6	65.7	23	1	1	8
Low pre-set velocity loss	5	Bench press: 0.45 ms$^{-1}$; Squat: 0.60 ms$^{-1}$	3	4	33.3333	0.32	7	Bench press	170.6	65.7	23	1	1	8
Low pre-set velocity loss	5	Bench press: 0.38 ms$^{-1}$; Squat: 0.49 ms$^{-1}$	1	2	54.0541	0.17	4	Bench press	170.6	65.7	23	1	1	8
Low pre-set velocity loss	5	Bench press: 0.38 ms$^{-1}$; Squat: 0.49 ms$^{-1}$	2	2	27.027	0.27	3	Bench press	170.6	65.7	23	1	1	8
Low pre-set velocity loss	5	Bench press: 0.38 ms$^{-1}$; Squat: 0.49 ms$^{-1}$	3	3	2.7027	0.36	2	Bench press	170.6	65.7	23	1	1	8
Low pre-set velocity loss	5	Bench press: 0.38 ms$^{-1}$; Squat: 0.49 ms$^{-1}$	4	2	13.5135	0.32	3	Bench press	170.6	65.7	23	1	1	8
Low pre-set velocity loss	5	Bench press: 0.38 ms$^{-1}$; Squat: 0.49 ms$^{-1}$	5	1	35.1351	0.24	4	Bench press	170.6	65.7	23	1	1	8
Low pre-set velocity loss	5	Bench press: 0.53 ms$^{-1}$; Squat: 0.70 ms$^{-1}$	2	4	27.451	0.37	8	Bench press	170.6	65.7	23	1	1	8
Low pre-set velocity loss	5	Bench press: 0.53 ms$^{-1}$; Squat: 0.70 ms$^{-1}$	3	3	33.3333	0.34	7	Bench press	170.6	65.7	23	1	1	8
Low pre-set velocity loss	5	Bench press: 0.53 ms$^{-1}$; Squat: 0.70 ms$^{-1}$	4	4	39.2157	0.31	7	Bench press	170.6	65.7	23	1	1	8
Low pre-set velocity loss	6	Bench press: 0.45 ms$^{-1}$; Squat: 0.60 ms$^{-1}$	1	4	25	0.33	7	Bench press	170.6	65.7	23	1	1	8
Low pre-set velocity loss	6	Bench press: 0.45 ms$^{-1}$; Squat: 0.60 ms$^{-1}$	2	4	29.5455	0.31	6	Bench press	170.6	65.7	23	1	1	8
Low pre-set velocity loss	6	Bench press: 0.45 ms$^{-1}$; Squat: 0.60 ms$^{-1}$	3	4	52.2727	0.21	7	Bench press	170.6	65.7	23	1	1	8
Low pre-set velocity loss	6	Bench press: 0.45 ms$^{-1}$; Squat: 0.60 ms$^{-1}$	4	4	25	0.33	5	Bench press	170.6	65.7	23	1	1	8
Low pre-set velocity loss	6	Bench press: 0.38 ms$^{-1}$; Squat: 0.49 ms$^{-1}$	1	3	33.3333	0.26	4	Bench press	170.6	65.7	23	1	1	8
Low pre-set velocity loss	6	Bench press: 0.38 ms$^{-1}$; Squat: 0.49 ms$^{-1}$	2	1	51.2821	0.19	4	Bench press	170.6	65.7	23	1	1	8
Low pre-set velocity loss	6	Bench press: 0.38 ms$^{-1}$; Squat: 0.49 ms$^{-1}$	3	3	20.5128	0.31	2	Bench press	170.6	65.7	23	1	1	8
Low pre-set velocity loss	6	Bench press: 0.38 ms$^{-1}$; Squat: 0.49 ms$^{-1}$	4	1	58.9744	0.16	3	Bench press	170.6	65.7	23	1	1	8
Low pre-set velocity loss	6	Bench press: 0.38 ms$^{-1}$; Squat: 0.49 ms$^{-1}$	5	1	41.0256	0.23	3	Bench press	170.6	65.7	23	1	1	8
Low pre-set velocity loss	6	Bench press: 0.53 ms$^{-1}$; Squat: 0.70 ms$^{-1}$	1	4	54.717	0.24	6	Bench press	170.6	65.7	23	1	1	8
Low pre-set velocity loss	6	Bench press: 0.53 ms$^{-1}$; Squat: 0.70 ms$^{-1}$	5	4	22.6415	0.41	4	Bench press	170.6	65.7	23	1	1	8
Low pre-set velocity loss	6	Bench press: 0.53 ms$^{-1}$; Squat: 0.70 ms$^{-1}$	6	4	26.4151	0.39	5	Bench press	170.6	65.7	23	1	1	8
Low pre-set velocity loss	1	Bench press: 0.45 ms$^{-1}$; Squat: 0.60 ms$^{-1}$	1	2	25.8621	0.43	4	Squat	170.6	65.7	23	1	1	8
Low pre-set velocity loss	1	Bench press: 0.45 ms$^{-1}$; Squat: 0.60 ms$^{-1}$	2	2	18.9655	0.47	4	Squat	170.6	65.7	23	1	1	8
Low pre-set velocity loss	1	Bench press: 0.45 ms$^{-1}$; Squat: 0.60 ms$^{-1}$	3	1	20.6897	0.46	3	Squat	170.6	65.7	23	1	1	8
Low pre-set velocity loss	1	Bench press: 0.45 ms$^{-1}$; Squat: 0.60 ms$^{-1}$	4	1	24.1379	0.44	3	Squat	170.6	65.7	23	1	1	8
Low pre-set velocity loss	1	Bench press: 0.45 ms$^{-1}$; Squat: 0.60 ms$^{-1}$	5	1	25.8621	0.43	3	Squat	170.6	65.7	23	1	1	8
Low pre-set velocity loss	1	Bench press: 0.45 ms$^{-1}$; Squat: 0.60 ms$^{-1}$	6	1	22.4138	0.45	2	Squat	170.6	65.7	23	1	1	8
Low pre-set velocity loss	1	Bench press: 0.45 ms$^{-1}$; Squat: 0.60 ms$^{-1}$	7	1	22.4138	0.45	2	Squat	170.6	65.7	23	1	1	8
Low pre-set velocity loss	1	Bench press: 0.45 ms$^{-1}$; Squat: 0.60 ms$^{-1}$	8	1	20.6897	0.46	2	Squat	170.6	65.7	23	1	1	8
Low pre-set velocity loss	1	Bench press: 0.38 ms$^{-1}$; Squat: 0.49 ms$^{-1}$	1	1	18.3673	0.4	2	Squat	170.6	65.7	23	1	1	8
Low pre-set velocity loss	1	Bench press: 0.38 ms$^{-1}$; Squat: 0.49 ms$^{-1}$	2	1	18.3673	0.4	2	Squat	170.6	65.7	23	1	1	8
Low pre-set velocity loss	1	Bench press: 0.38 ms$^{-1}$; Squat: 0.49 ms$^{-1}$	3	1	16.3265	0.41	2	Squat	170.6	65.7	23	1	1	8
Low pre-set velocity loss	1	Bench press: 0.38 ms$^{-1}$; Squat: 0.49 ms$^{-1}$	4	1	18.3673	0.4	2	Squat	170.6	65.7	23	1	1	8
Low pre-set velocity loss	1	Bench press: 0.38 ms$^{-1}$; Squat: 0.49 ms$^{-1}$	5	1	18.3673	0.4	2	Squat	170.6	65.7	23	1	1	8
Low pre-set velocity loss	1	Bench press: 0.53 ms$^{-1}$; Squat: 0.70 ms$^{-1}$	1	4	24.2857	0.53	6	Squat	170.6	65.7	23	1	1	8
Low pre-set velocity loss	1	Bench press: 0.53 ms$^{-1}$; Squat: 0.70 ms$^{-1}$	2	3	24.2857	0.53	6	Squat	170.6	65.7	23	1	1	8
Low pre-set velocity loss	1	Bench press: 0.53 ms$^{-1}$; Squat: 0.70 ms$^{-1}$	3	4	20	0.56	3	Squat	170.6	65.7	23	1	1	8
Low pre-set velocity loss	1	Bench press: 0.53 ms$^{-1}$; Squat: 0.70 ms$^{-1}$	4	3	20	0.56	3	Squat	170.6	65.7	23	1	1	8
Low pre-set velocity loss	1	Bench press: 0.53 ms$^{-1}$; Squat: 0.70 ms$^{-1}$	5	3	11.4286	0.62	2	Squat	170.6	65.7	23	1	1	8
Low pre-set velocity loss	2	Bench press: 0.45 ms$^{-1}$; Squat: 0.60 ms$^{-1}$	1	3	23.8095	0.48	4	Squat	170.6	65.7	23	1	1	8
Low pre-set velocity loss	2	Bench press: 0.45 ms$^{-1}$; Squat: 0.60 ms$^{-1}$	2	2	22.2222	0.49	3	Squat	170.6	65.7	23	1	1	8
Low pre-set velocity loss	2	Bench press: 0.45 ms$^{-1}$; Squat: 0.60 ms$^{-1}$	3	2	19.0476	0.51	3	Squat	170.6	65.7	23	1	1	8
Low pre-set velocity loss	2	Bench press: 0.45 ms$^{-1}$; Squat: 0.60 ms$^{-1}$	4	2	22.2222	0.49	3	Squat	170.6	65.7	23	1	1	8
Low pre-set velocity loss	2	Bench press: 0.45 ms$^{-1}$; Squat: 0.60 ms$^{-1}$	5	2	23.8095	0.48	2	Squat	170.6	65.7	23	1	1	8
Low pre-set velocity loss	2	Bench press: 0.45 ms$^{-1}$; Squat: 0.60 ms$^{-1}$	6	1	31.746	0.43	3	Squat	170.6	65.7	23	1	1	8
Low pre-set velocity loss	2	Bench press: 0.38 ms$^{-1}$; Squat: 0.49 ms$^{-1}$	1	1	22.9167	0.37	3	Squat	170.6	65.7	23	1	1	8
Low pre-set velocity loss	2	Bench press: 0.38 ms$^{-1}$; Squat: 0.49 ms$^{-1}$	2	1	22.9167	0.37	3	Squat	170.6	65.7	23	1	1	8
Low pre-set velocity loss	2	Bench press: 0.38 ms$^{-1}$; Squat: 0.49 ms$^{-1}$	3	1	20.8333	0.38	3	Squat	170.6	65.7	23	1	1	8
Low pre-set velocity loss	2	Bench press: 0.38 ms$^{-1}$; Squat: 0.49 ms$^{-1}$	4	1	16.6667	0.4	2	Squat	170.6	65.7	23	1	1	8
Low pre-set velocity loss	2	Bench press: 0.38 ms$^{-1}$; Squat: 0.49 ms$^{-1}$	5	1	22.9167	0.37	2	Squat	170.6	65.7	23	1	1	8
Low pre-set velocity loss	2	Bench press: 0.53 ms$^{-1}$; Squat: 0.70 ms$^{-1}$	1	3	19.4444	0.58	6	Squat	170.6	65.7	23	1	1	8
Low pre-set velocity loss	2	Bench press: 0.53 ms$^{-1}$; Squat: 0.70 ms$^{-1}$	2	3	27.7778	0.52	6	Squat	170.6	65.7	23	1	1	8
Low pre-set velocity loss	2	Bench press: 0.53 ms$^{-1}$; Squat: 0.70 ms$^{-1}$	3	3	19.4444	0.58	5	Squat	170.6	65.7	23	1	1	8
Low pre-set velocity loss	2	Bench press: 0.53 ms$^{-1}$; Squat: 0.70 ms$^{-1}$	4	3	12.5	0.63	4	Squat	170.6	65.7	23	1	1	8
Low pre-set velocity loss	2	Bench press: 0.53 ms$^{-1}$; Squat: 0.70 ms$^{-1}$	5	3	19.4444	0.58	5	Squat	170.6	65.7	23	1	1	8
Low pre-set velocity loss	2	Bench press: 0.53 ms$^{-1}$; Squat: 0.70 ms$^{-1}$	6	3	16.6667	0.6	4	Squat	170.6	65.7	23	1	1	8
Low pre-set velocity loss	3	Bench press: 0.45 ms$^{-1}$; Squat: 0.60 ms$^{-1}$	1	2	20.339	0.47	4	Squat	170.6	65.7	23	1	1	8
Low pre-set velocity loss	3	Bench press: 0.45 ms$^{-1}$; Squat: 0.60 ms$^{-1}$	2	2	20.339	0.47	3	Squat	170.6	65.7	23	1	1	8
Low pre-set velocity loss	3	Bench press: 0.45 ms$^{-1}$; Squat: 0.60 ms$^{-1}$	3	2	16.9492	0.49	3	Squat	170.6	65.7	23	1	1	8
Low pre-set velocity loss	3	Bench press: 0.45 ms$^{-1}$; Squat: 0.60 ms$^{-1}$	4	1	22.0339	0.46	3	Squat	170.6	65.7	23	1	1	8
Low pre-set velocity loss	3	Bench press: 0.45 ms$^{-1}$; Squat: 0.60 ms$^{-1}$	5	2	20.339	0.47	3	Squat	170.6	65.7	23	1	1	8
Low pre-set velocity loss	3	Bench press: 0.45 ms$^{-1}$; Squat: 0.60 ms$^{-1}$	6	2	18.6441	0.48	3	Squat	170.6	65.7	23	1	1	8
Low pre-set velocity loss	3	Bench press: 0.38 ms$^{-1}$; Squat: 0.49 ms$^{-1}$	1	1	19.6078	0.41	3	Squat	170.6	65.7	23	1	1	8
Low pre-set velocity loss	3	Bench press: 0.38 ms$^{-1}$; Squat: 0.49 ms$^{-1}$	2	2	21.5686	0.4	3	Squat	170.6	65.7	23	1	1	8
Low pre-set velocity loss	3	Bench press: 0.38 ms$^{-1}$; Squat: 0.49 ms$^{-1}$	3	1	21.5686	0.4	2	Squat	170.6	65.7	23	1	1	8
Low pre-set velocity loss	3	Bench press: 0.38 ms$^{-1}$; Squat: 0.49 ms$^{-1}$	4	1	27.451	0.37	2	Squat	170.6	65.7	23	1	1	8
Low pre-set velocity loss	3	Bench press: 0.38 ms$^{-1}$; Squat: 0.49 ms$^{-1}$	5	1	27.451	0.37	2	Squat	170.6	65.7	23	1	1	8
Low pre-set velocity loss	3	Bench press: 0.38 ms$^{-1}$; Squat: 0.49 ms$^{-1}$	6	1	21.5686	0.4	1	Squat	170.6	65.7	23	1	1	8
Low pre-set velocity loss	3	Bench press: 0.38 ms$^{-1}$; Squat: 0.49 ms$^{-1}$	7	1	21.5686	0.4	1	Squat	170.6	65.7	23	1	1	8
Low pre-set velocity loss	3	Bench press: 0.53 ms$^{-1}$; Squat: 0.70 ms$^{-1}$	1	4	14.0845	0.61	4	Squat	170.6	65.7	23	1	1	8
Low pre-set velocity loss	3	Bench press: 0.53 ms$^{-1}$; Squat: 0.70 ms$^{-1}$	2	3	19.7183	0.57	6	Squat	170.6	65.7	23	1	1	8
Low pre-set velocity loss	3	Bench press: 0.53 ms$^{-1}$; Squat: 0.70 ms$^{-1}$	3	3	18.3099	0.58	5	Squat	170.6	65.7	23	1	1	8
Low pre-set velocity loss	3	Bench press: 0.53 ms$^{-1}$; Squat: 0.70 ms$^{-1}$	4	4	19.7183	0.57	6	Squat	170.6	65.7	23	1	1	8
Low pre-set velocity loss	3	Bench press: 0.53 ms$^{-1}$; Squat: 0.70 ms$^{-1}$	5	4	21.1268	0.56	4	Squat	170.6	65.7	23	1	1	8
Low pre-set velocity loss	3	Bench press: 0.53 ms$^{-1}$; Squat: 0.70 ms$^{-1}$	6	3	18.3099	0.58	4	Squat	170.6	65.7	23	1	1	8
Low pre-set velocity loss	4	Bench press: 0.45 ms$^{-1}$; Squat: 0.60 ms$^{-1}$	1	2	22.0339	0.46	4	Squat	170.6	65.7	23	1	1	8
Low pre-set velocity loss	4	Bench press: 0.45 ms$^{-1}$; Squat: 0.60 ms$^{-1}$	2	2	18.6441	0.48	3	Squat	170.6	65.7	23	1	1	8
Low pre-set velocity loss	4	Bench press: 0.45 ms$^{-1}$; Squat: 0.60 ms$^{-1}$	3	2	18.6441	0.48	4	Squat	170.6	65.7	23	1	1	8
Low pre-set velocity loss	4	Bench press: 0.45 ms$^{-1}$; Squat: 0.60 ms$^{-1}$	4	2	18.6441	0.48	3	Squat	170.6	65.7	23	1	1	8
Low pre-set velocity loss	4	Bench press: 0.45 ms$^{-1}$; Squat: 0.60 ms$^{-1}$	5	2	18.6441	0.48	3	Squat	170.6	65.7	23	1	1	8
Low pre-set velocity loss	4	Bench press: 0.38 ms$^{-1}$; Squat: 0.49 ms$^{-1}$	1	2	15.6863	0.43	2	Squat	170.6	65.7	23	1	1	8
Low pre-set velocity loss	4	Bench press: 0.38 ms$^{-1}$; Squat: 0.49 ms$^{-1}$	2	2	19.6078	0.41	2	Squat	170.6	65.7	23	1	1	8
Low pre-set velocity loss	4	Bench press: 0.38 ms$^{-1}$; Squat: 0.49 ms$^{-1}$	3	1	23.5294	0.39	3	Squat	170.6	65.7	23	1	1	8
Low pre-set velocity loss	4	Bench press: 0.38 ms$^{-1}$; Squat: 0.49 ms$^{-1}$	4	2	17.6471	0.42	2	Squat	170.6	65.7	23	1	1	8
Low pre-set velocity loss	4	Bench press: 0.38 ms$^{-1}$; Squat: 0.49 ms$^{-1}$	5	1	19.6078	0.41	2	Squat	170.6	65.7	23	1	1	8
Low pre-set velocity loss	4	Bench press: 0.53 ms$^{-1}$; Squat: 0.70 ms$^{-1}$	2	4	21.9178	0.57	8	Squat	170.6	65.7	23	1	1	8
Low pre-set velocity loss	4	Bench press: 0.53 ms$^{-1}$; Squat: 0.70 ms$^{-1}$	3	4	17.8082	0.6	6	Squat	170.6	65.7	23	1	1	8
Low pre-set velocity loss	4	Bench press: 0.53 ms$^{-1}$; Squat: 0.70 ms$^{-1}$	4	4	21.9178	0.57	6	Squat	170.6	65.7	23	1	1	8
Low pre-set velocity loss	5	Bench press: 0.45 ms$^{-1}$; Squat: 0.60 ms$^{-1}$	1	3	14.0351	0.49	4	Squat	170.6	65.7	23	1	1	8
Low pre-set velocity loss	5	Bench press: 0.45 ms$^{-1}$; Squat: 0.60 ms$^{-1}$	2	3	17.5439	0.47	4	Squat	170.6	65.7	23	1	1	8
Low pre-set velocity loss	5	Bench press: 0.45 ms$^{-1}$; Squat: 0.60 ms$^{-1}$	3	2	17.5439	0.47	4	Squat	170.6	65.7	23	1	1	8
Low pre-set velocity loss	5	Bench press: 0.45 ms$^{-1}$; Squat: 0.60 ms$^{-1}$	4	2	29.8246	0.4	4	Squat	170.6	65.7	23	1	1	8
Low pre-set velocity loss	5	Bench press: 0.45 ms$^{-1}$; Squat: 0.60 ms$^{-1}$	5	2	22.807	0.44	3	Squat	170.6	65.7	23	1	1	8
Low pre-set velocity loss	5	Bench press: 0.45 ms$^{-1}$; Squat: 0.60 ms$^{-1}$	6	1	29.8246	0.4	3	Squat	170.6	65.7	23	1	1	8
Low pre-set velocity loss	5	Bench press: 0.45 ms$^{-1}$; Squat: 0.60 ms$^{-1}$	7	2	7.01754	0.53	2	Squat	170.6	65.7	23	1	1	8
Low pre-set velocity loss	5	Bench press: 0.38 ms$^{-1}$; Squat: 0.49 ms$^{-1}$	1	1	24.4898	0.37	3	Squat	170.6	65.7	23	1	1	8
Low pre-set velocity loss	5	Bench press: 0.38 ms$^{-1}$; Squat: 0.49 ms$^{-1}$	2	1	28.5714	0.35	3	Squat	170.6	65.7	23	1	1	8
Low pre-set velocity loss	5	Bench press: 0.38 ms$^{-1}$; Squat: 0.49 ms$^{-1}$	3	1	34.6939	0.32	3	Squat	170.6	65.7	23	1	1	8
Low pre-set velocity loss	5	Bench press: 0.38 ms$^{-1}$; Squat: 0.49 ms$^{-1}$	4	2	4.08163	0.47	1	Squat	170.6	65.7	23	1	1	8
Low pre-set velocity loss	5	Bench press: 0.38 ms$^{-1}$; Squat: 0.49 ms$^{-1}$	5	1	30.6122	0.34	2	Squat	170.6	65.7	23	1	1	8
Low pre-set velocity loss	5	Bench press: 0.38 ms$^{-1}$; Squat: 0.49 ms$^{-1}$	6	2	8.16327	0.45	1	Squat	170.6	65.7	23	1	1	8
Low pre-set velocity loss	5	Bench press: 0.38 ms$^{-1}$; Squat: 0.49 ms$^{-1}$	7	1	18.3673	0.4	1	Squat	170.6	65.7	23	1	1	8
Low pre-set velocity loss	5	Bench press: 0.38 ms$^{-1}$; Squat: 0.49 ms$^{-1}$	8	2	8.16327	0.45	1	Squat	170.6	65.7	23	1	1	8
Low pre-set velocity loss	5	Bench press: 0.38 ms$^{-1}$; Squat: 0.49 ms$^{-1}$	9	1	16.3265	0.41	1	Squat	170.6	65.7	23	1	1	8
Low pre-set velocity loss	5	Bench press: 0.53 ms$^{-1}$; Squat: 0.70 ms$^{-1}$	1	4	15.7143	0.59	7	Squat	170.6	65.7	23	1	1	8
Low pre-set velocity loss	5	Bench press: 0.53 ms$^{-1}$; Squat: 0.70 ms$^{-1}$	2	3	22.8571	0.54	8	Squat	170.6	65.7	23	1	1	8
Low pre-set velocity loss	5	Bench press: 0.53 ms$^{-1}$; Squat: 0.70 ms$^{-1}$	3	3	27.1429	0.51	7	Squat	170.6	65.7	23	1	1	8
Low pre-set velocity loss	5	Bench press: 0.53 ms$^{-1}$; Squat: 0.70 ms$^{-1}$	4	3	31.4286	0.48	6	Squat	170.6	65.7	23	1	1	8
Low pre-set velocity loss	5	Bench press: 0.53 ms$^{-1}$; Squat: 0.70 ms$^{-1}$	5	3	17.1429	0.58	5	Squat	170.6	65.7	23	1	1	8
Low pre-set velocity loss	6	Bench press: 0.45 ms$^{-1}$; Squat: 0.60 ms$^{-1}$	1	3	24.1935	0.47	6	Squat	170.6	65.7	23	1	1	8
Low pre-set velocity loss	6	Bench press: 0.45 ms$^{-1}$; Squat: 0.60 ms$^{-1}$	2	3	27.4194	0.45	5	Squat	170.6	65.7	23	1	1	8
Low pre-set velocity loss	6	Bench press: 0.45 ms$^{-1}$; Squat: 0.60 ms$^{-1}$	3	3	20.9677	0.49	3	Squat	170.6	65.7	23	1	1	8
Low pre-set velocity loss	6	Bench press: 0.45 ms$^{-1}$; Squat: 0.60 ms$^{-1}$	4	3	19.3548	0.5	3	Squat	170.6	65.7	23	1	1	8
Low pre-set velocity loss	6	Bench press: 0.45 ms$^{-1}$; Squat: 0.60 ms$^{-1}$	5	4	17.7419	0.51	3	Squat	170.6	65.7	23	1	1	8
Low pre-set velocity loss	6	Bench press: 0.45 ms$^{-1}$; Squat: 0.60 ms$^{-1}$	6	3	24.1935	0.47	3	Squat	170.6	65.7	23	1	1	8
Low pre-set velocity loss	6	Bench press: 0.45 ms$^{-1}$; Squat: 0.60 ms$^{-1}$	7	3	19.3548	0.5	2	Squat	170.6	65.7	23	1	1	8
Low pre-set velocity loss	6	Bench press: 0.38 ms$^{-1}$; Squat: 0.49 ms$^{-1}$	1	1	31.25	0.33	4	Squat	170.6	65.7	23	1	1	8
Low pre-set velocity loss	6	Bench press: 0.38 ms$^{-1}$; Squat: 0.49 ms$^{-1}$	2	2	20.8333	0.38	3	Squat	170.6	65.7	23	1	1	8
Low pre-set velocity loss	6	Bench press: 0.38 ms$^{-1}$; Squat: 0.49 ms$^{-1}$	3	1	10.4167	0.43	3	Squat	170.6	65.7	23	1	1	8
Low pre-set velocity loss	6	Bench press: 0.38 ms$^{-1}$; Squat: 0.49 ms$^{-1}$	4	1	16.6667	0.4	2	Squat	170.6	65.7	23	1	1	8
Low pre-set velocity loss	6	Bench press: 0.38 ms$^{-1}$; Squat: 0.49 ms$^{-1}$	5	1	20.8333	0.38	2	Squat	170.6	65.7	23	1	1	8
Low pre-set velocity loss	6	Bench press: 0.53 ms$^{-1}$; Squat: 0.70 ms$^{-1}$	1	4	20.2899	0.55	6	Squat	170.6	65.7	23	1	1	8
Low pre-set velocity loss	6	Bench press: 0.53 ms$^{-1}$; Squat: 0.70 ms$^{-1}$	2	4	17.3913	0.57	7	Squat	170.6	65.7	23	1	1	8
Low pre-set velocity loss	6	Bench press: 0.53 ms$^{-1}$; Squat: 0.70 ms$^{-1}$	3	4	21.7391	0.54	6	Squat	170.6	65.7	23	1	1	8
Low pre-set velocity loss	6	Bench press: 0.53 ms$^{-1}$; Squat: 0.70 ms$^{-1}$	4	4	15.942	0.58	5	Squat	170.6	65.7	23	1	1	8
Low pre-set velocity loss	6	Bench press: 0.53 ms$^{-1}$; Squat: 0.70 ms$^{-1}$	5	3	20.2899	0.55	8	Squat	170.6	65.7	23	1	1	8
High pre-set velocity loss	1	Bench press: 0.45 ms$^{-1}$; Squat: 0.60 ms$^{-1}$	1	2	63.2653	0.18	7	Bench press	173	78.5	20	0	1	9
High pre-set velocity loss	1	Bench press: 0.45 ms$^{-1}$; Squat: 0.60 ms$^{-1}$	2	1	65.3061	0.17	6	Bench press	173	78.5	20	0	1	9
High pre-set velocity loss	1	Bench press: 0.38 ms$^{-1}$; Squat: 0.49 ms$^{-1}$	1	1	63.1579	0.14	5	Bench press	173	78.5	20	0	1	9
High pre-set velocity loss	1	Bench press: 0.38 ms$^{-1}$; Squat: 0.49 ms$^{-1}$	2	1	63.1579	0.14	3	Bench press	173	78.5	20	0	1	9
High pre-set velocity loss	1	Bench press: 0.53 ms$^{-1}$; Squat: 0.70 ms$^{-1}$	1	1	74.5098	0.13	9	Bench press	173	78.5	20	0	1	9
High pre-set velocity loss	1	Bench press: 0.53 ms$^{-1}$; Squat: 0.70 ms$^{-1}$	2	1	50.9804	0.25	7	Bench press	173	78.5	20	0	1	9
High pre-set velocity loss	2	Bench press: 0.45 ms$^{-1}$; Squat: 0.60 ms$^{-1}$	1	2	47.7273	0.23	8	Bench press	173	78.5	20	0	1	9
High pre-set velocity loss	2	Bench press: 0.45 ms$^{-1}$; Squat: 0.60 ms$^{-1}$	2	0	72.7273	0.12	9	Bench press	173	78.5	20	0	1	9
High pre-set velocity loss	2	Bench press: 0.45 ms$^{-1}$; Squat: 0.60 ms$^{-1}$	3	1	68.1818	0.14	6	Bench press	173	78.5	20	0	1	9
High pre-set velocity loss	2	Bench press: 0.38 ms$^{-1}$; Squat: 0.49 ms$^{-1}$	1	2	65	0.14	6	Bench press	173	78.5	20	0	1	9
High pre-set velocity loss	2	Bench press: 0.38 ms$^{-1}$; Squat: 0.49 ms$^{-1}$	2	0	47.5	0.21	5	Bench press	173	78.5	20	0	1	9
High pre-set velocity loss	2	Bench press: 0.38 ms$^{-1}$; Squat: 0.49 ms$^{-1}$	3	0	67.5	0.13	4	Bench press	173	78.5	20	0	1	9
High pre-set velocity loss	2	Bench press: 0.53 ms$^{-1}$; Squat: 0.70 ms$^{-1}$	1	2	54	0.23	13	Bench press	173	78.5	20	0	1	9
High pre-set velocity loss	2	Bench press: 0.53 ms$^{-1}$; Squat: 0.70 ms$^{-1}$	2	2	52	0.24	9	Bench press	173	78.5	20	0	1	9
High pre-set velocity loss	2	Bench press: 0.53 ms$^{-1}$; Squat: 0.70 ms$^{-1}$	3	1	70	0.15	10	Bench press	173	78.5	20	0	1	9
High pre-set velocity loss	3	Bench press: 0.45 ms$^{-1}$; Squat: 0.60 ms$^{-1}$	1	2	59.5745	0.19	8	Bench press	173	78.5	20	0	1	9
High pre-set velocity loss	3	Bench press: 0.45 ms$^{-1}$; Squat: 0.60 ms$^{-1}$	2	0	72.3404	0.13	9	Bench press	173	78.5	20	0	1	9
High pre-set velocity loss	3	Bench press: 0.45 ms$^{-1}$; Squat: 0.60 ms$^{-1}$	3	1	57.4468	0.2	6	Bench press	173	78.5	20	0	1	9
High pre-set velocity loss	3	Bench press: 0.38 ms$^{-1}$; Squat: 0.49 ms$^{-1}$	1	0	65.8537	0.14	8	Bench press	173	78.5	20	0	1	9
High pre-set velocity loss	3	Bench press: 0.38 ms$^{-1}$; Squat: 0.49 ms$^{-1}$	2	2	60.9756	0.16	6	Bench press	173	78.5	20	0	1	9
High pre-set velocity loss	3	Bench press: 0.38 ms$^{-1}$; Squat: 0.49 ms$^{-1}$	3	2	53.6585	0.19	5	Bench press	173	78.5	20	0	1	9
High pre-set velocity loss	3	Bench press: 0.53 ms$^{-1}$; Squat: 0.70 ms$^{-1}$	1	2	50.9804	0.25	10	Bench press	173	78.5	20	0	1	9
High pre-set velocity loss	3	Bench press: 0.53 ms$^{-1}$; Squat: 0.70 ms$^{-1}$	2	1	60.7843	0.2	8	Bench press	173	78.5	20	0	1	9
High pre-set velocity loss	3	Bench press: 0.53 ms$^{-1}$; Squat: 0.70 ms$^{-1}$	3	2	60.7843	0.2	9	Bench press	173	78.5	20	0	1	9
High pre-set velocity loss	4	Bench press: 0.45 ms$^{-1}$; Squat: 0.60 ms$^{-1}$	1	2	59.0909	0.18	8	Bench press	173	78.5	20	0	1	9
High pre-set velocity loss	4	Bench press: 0.45 ms$^{-1}$; Squat: 0.60 ms$^{-1}$	2	1	68.1818	0.14	7	Bench press	173	78.5	20	0	1	9
High pre-set velocity loss	4	Bench press: 0.45 ms$^{-1}$; Squat: 0.60 ms$^{-1}$	3	2	63.6364	0.16	6	Bench press	173	78.5	20	0	1	9
High pre-set velocity loss	4	Bench press: 0.38 ms$^{-1}$; Squat: 0.49 ms$^{-1}$	1	2	57.5	0.17	7	Bench press	173	78.5	20	0	1	9
High pre-set velocity loss	4	Bench press: 0.38 ms$^{-1}$; Squat: 0.49 ms$^{-1}$	2	1	60	0.16	6	Bench press	173	78.5	20	0	1	9
High pre-set velocity loss	4	Bench press: 0.38 ms$^{-1}$; Squat: 0.49 ms$^{-1}$	3	1	60	0.16	6	Bench press	173	78.5	20	0	1	9
High pre-set velocity loss	4	Bench press: 0.53 ms$^{-1}$; Squat: 0.70 ms$^{-1}$	1	2	64.1509	0.19	9	Bench press	173	78.5	20	0	1	9
High pre-set velocity loss	4	Bench press: 0.53 ms$^{-1}$; Squat: 0.70 ms$^{-1}$	2	1	58.4906	0.22	9	Bench press	173	78.5	20	0	1	9
High pre-set velocity loss	4	Bench press: 0.53 ms$^{-1}$; Squat: 0.70 ms$^{-1}$	3	2	64.1509	0.19	7	Bench press	173	78.5	20	0	1	9
High pre-set velocity loss	5	Bench press: 0.45 ms$^{-1}$; Squat: 0.60 ms$^{-1}$	1	1	65.9574	0.16	8	Bench press	173	78.5	20	0	1	9
High pre-set velocity loss	5	Bench press: 0.45 ms$^{-1}$; Squat: 0.60 ms$^{-1}$	2	1	61.7021	0.18	8	Bench press	173	78.5	20	0	1	9
High pre-set velocity loss	5	Bench press: 0.45 ms$^{-1}$; Squat: 0.60 ms$^{-1}$	3	1	65.9574	0.16	7	Bench press	173	78.5	20	0	1	9
High pre-set velocity loss	5	Bench press: 0.45 ms$^{-1}$; Squat: 0.60 ms$^{-1}$	4	2	42.5532	0.27	5	Bench press	173	78.5	20	0	1	9
High pre-set velocity loss	5	Bench press: 0.38 ms$^{-1}$; Squat: 0.49 ms$^{-1}$	1	2	57.8947	0.16	8	Bench press	173	78.5	20	0	1	9
High pre-set velocity loss	5	Bench press: 0.38 ms$^{-1}$; Squat: 0.49 ms$^{-1}$	2	1	57.8947	0.16	5	Bench press	173	78.5	20	0	1	9
High pre-set velocity loss	5	Bench press: 0.38 ms$^{-1}$; Squat: 0.49 ms$^{-1}$	3	1	50	0.19	4	Bench press	173	78.5	20	0	1	9
High pre-set velocity loss	5	Bench press: 0.38 ms$^{-1}$; Squat: 0.49 ms$^{-1}$	4	1	50	0.19	4	Bench press	173	78.5	20	0	1	9
High pre-set velocity loss	5	Bench press: 0.53 ms$^{-1}$; Squat: 0.70 ms$^{-1}$	1	3	61.8182	0.21	8	Bench press	173	78.5	20	0	1	9
High pre-set velocity loss	5	Bench press: 0.53 ms$^{-1}$; Squat: 0.70 ms$^{-1}$	2	2	67.2727	0.18	11	Bench press	173	78.5	20	0	1	9
High pre-set velocity loss	5	Bench press: 0.53 ms$^{-1}$; Squat: 0.70 ms$^{-1}$	3	2	58.1818	0.23	8	Bench press	173	78.5	20	0	1	9
High pre-set velocity loss	5	Bench press: 0.53 ms$^{-1}$; Squat: 0.70 ms$^{-1}$	4	1	56.3636	0.24	9	Bench press	173	78.5	20	0	1	9
High pre-set velocity loss	6	Bench press: 0.45 ms$^{-1}$; Squat: 0.60 ms$^{-1}$	1	2	52.2727	0.21	8	Bench press	173	78.5	20	0	1	9
High pre-set velocity loss	6	Bench press: 0.45 ms$^{-1}$; Squat: 0.60 ms$^{-1}$	2	1	65.9091	0.15	8	Bench press	173	78.5	20	0	1	9
High pre-set velocity loss	6	Bench press: 0.45 ms$^{-1}$; Squat: 0.60 ms$^{-1}$	3	0	68.1818	0.14	6	Bench press	173	78.5	20	0	1	9
High pre-set velocity loss	6	Bench press: 0.45 ms$^{-1}$; Squat: 0.60 ms$^{-1}$	4	2	52.2727	0.21	4	Bench press	173	78.5	20	0	1	9
High pre-set velocity loss	6	Bench press: 0.38 ms$^{-1}$; Squat: 0.49 ms$^{-1}$	1	2	57.1429	0.15	5	Bench press	173	78.5	20	0	1	9
High pre-set velocity loss	6	Bench press: 0.38 ms$^{-1}$; Squat: 0.49 ms$^{-1}$	2	2	51.4286	0.17	5	Bench press	173	78.5	20	0	1	9
High pre-set velocity loss	6	Bench press: 0.38 ms$^{-1}$; Squat: 0.49 ms$^{-1}$	3	1	62.8571	0.13	5	Bench press	173	78.5	20	0	1	9
High pre-set velocity loss	6	Bench press: 0.38 ms$^{-1}$; Squat: 0.49 ms$^{-1}$	4	2	51.4286	0.17	4	Bench press	173	78.5	20	0	1	9
High pre-set velocity loss	6	Bench press: 0.53 ms$^{-1}$; Squat: 0.70 ms$^{-1}$	1	2	66.0377	0.18	9	Bench press	173	78.5	20	0	1	9
High pre-set velocity loss	6	Bench press: 0.53 ms$^{-1}$; Squat: 0.70 ms$^{-1}$	2	3	52.8302	0.25	9	Bench press	173	78.5	20	0	1	9
High pre-set velocity loss	6	Bench press: 0.53 ms$^{-1}$; Squat: 0.70 ms$^{-1}$	3	1	60.3774	0.21	11	Bench press	173	78.5	20	0	1	9
High pre-set velocity loss	1	Bench press: 0.45 ms$^{-1}$; Squat: 0.60 ms$^{-1}$	1	2	46.7742	0.33	7	Squat	173	78.5	20	0	1	9
High pre-set velocity loss	1	Bench press: 0.45 ms$^{-1}$; Squat: 0.60 ms$^{-1}$	2	3	41.9355	0.36	5	Squat	173	78.5	20	0	1	9
High pre-set velocity loss	1	Bench press: 0.38 ms$^{-1}$; Squat: 0.49 ms$^{-1}$	1	1	53.0612	0.23	3	Squat	173	78.5	20	0	1	9
High pre-set velocity loss	1	Bench press: 0.38 ms$^{-1}$; Squat: 0.49 ms$^{-1}$	2	1	46.9388	0.26	2	Squat	173	78.5	20	0	1	9
High pre-set velocity loss	1	Bench press: 0.53 ms$^{-1}$; Squat: 0.70 ms$^{-1}$	1	3	44.1176	0.38	5	Squat	173	78.5	20	0	1	9
High pre-set velocity loss	1	Bench press: 0.53 ms$^{-1}$; Squat: 0.70 ms$^{-1}$	2	1	50	0.34	7	Squat	173	78.5	20	0	1	9
High pre-set velocity loss	2	Bench press: 0.45 ms$^{-1}$; Squat: 0.60 ms$^{-1}$	1	1	54.386	0.26	5	Squat	173	78.5	20	0	1	9
High pre-set velocity loss	2	Bench press: 0.45 ms$^{-1}$; Squat: 0.60 ms$^{-1}$	2	2	29.8246	0.4	3	Squat	173	78.5	20	0	1	9
High pre-set velocity loss	2	Bench press: 0.45 ms$^{-1}$; Squat: 0.60 ms$^{-1}$	3	2	38.5965	0.35	3	Squat	173	78.5	20	0	1	9
High pre-set velocity loss	2	Bench press: 0.38 ms$^{-1}$; Squat: 0.49 ms$^{-1}$	1	1	30.1887	0.37	3	Squat	173	78.5	20	0	1	9
High pre-set velocity loss	2	Bench press: 0.38 ms$^{-1}$; Squat: 0.49 ms$^{-1}$	2	1	37.7358	0.33	4	Squat	173	78.5	20	0	1	9
High pre-set velocity loss	2	Bench press: 0.38 ms$^{-1}$; Squat: 0.49 ms$^{-1}$	3	0	43.3962	0.3	3	Squat	173	78.5	20	0	1	9
High pre-set velocity loss	2	Bench press: 0.53 ms$^{-1}$; Squat: 0.70 ms$^{-1}$	1	1	44.2857	0.39	7	Squat	173	78.5	20	0	1	9
High pre-set velocity loss	2	Bench press: 0.53 ms$^{-1}$; Squat: 0.70 ms$^{-1}$	2	1	37.1429	0.44	6	Squat	173	78.5	20	0	1	9
High pre-set velocity loss	2	Bench press: 0.53 ms$^{-1}$; Squat: 0.70 ms$^{-1}$	3	2	25.7143	0.52	6	Squat	173	78.5	20	0	1	9
High pre-set velocity loss	3	Bench press: 0.45 ms$^{-1}$; Squat: 0.60 ms$^{-1}$	1	1	40.678	0.35	5	Squat	173	78.5	20	0	1	9
High pre-set velocity loss	3	Bench press: 0.45 ms$^{-1}$; Squat: 0.60 ms$^{-1}$	2	1	42.3729	0.34	3	Squat	173	78.5	20	0	1	9
High pre-set velocity loss	3	Bench press: 0.45 ms$^{-1}$; Squat: 0.60 ms$^{-1}$	3	1	44.0678	0.33	4	Squat	173	78.5	20	0	1	9
High pre-set velocity loss	3	Bench press: 0.38 ms$^{-1}$; Squat: 0.49 ms$^{-1}$	1	2	32.6087	0.31	6	Squat	173	78.5	20	0	1	9
High pre-set velocity loss	3	Bench press: 0.38 ms$^{-1}$; Squat: 0.49 ms$^{-1}$	2	0	45.6522	0.25	5	Squat	173	78.5	20	0	1	9
High pre-set velocity loss	3	Bench press: 0.38 ms$^{-1}$; Squat: 0.49 ms$^{-1}$	3	1	41.3043	0.27	4	Squat	173	78.5	20	0	1	9
Low pre-set velocity loss	1	Bench press: 0.45 ms$^{-1}$; Squat: 0.60 ms$^{-1}$	1	3	27.2727	0.32	3	Bench press	177	83.1	26	0	1	10
Low pre-set velocity loss	1	Bench press: 0.45 ms$^{-1}$; Squat: 0.60 ms$^{-1}$	2	3	34.0909	0.29	4	Bench press	177	83.1	26	0	1	10
Low pre-set velocity loss	1	Bench press: 0.45 ms$^{-1}$; Squat: 0.60 ms$^{-1}$	3	3	27.2727	0.32	3	Bench press	177	83.1	26	0	1	10
Low pre-set velocity loss	1	Bench press: 0.38 ms$^{-1}$; Squat: 0.49 ms$^{-1}$	1	2	35.1351	0.24	4	Bench press	177	83.1	26	0	1	10
Low pre-set velocity loss	1	Bench press: 0.38 ms$^{-1}$; Squat: 0.49 ms$^{-1}$	2	2	27.027	0.27	3	Bench press	177	83.1	26	0	1	10
Low pre-set velocity loss	1	Bench press: 0.53 ms$^{-1}$; Squat: 0.70 ms$^{-1}$	1	1	33.3333	0.34	7	Bench press	177	83.1	26	0	1	10
Low pre-set velocity loss	1	Bench press: 0.53 ms$^{-1}$; Squat: 0.70 ms$^{-1}$	2	2	13.7255	0.44	5	Bench press	177	83.1	26	0	1	10
Low pre-set velocity loss	1	Bench press: 0.53 ms$^{-1}$; Squat: 0.70 ms$^{-1}$	3	2	45.098	0.28	6	Bench press	177	83.1	26	0	1	10
Low pre-set velocity loss	1	Bench press: 0.53 ms$^{-1}$; Squat: 0.70 ms$^{-1}$	4	2	39.2157	0.31	6	Bench press	177	83.1	26	0	1	10
Low pre-set velocity loss	2	Bench press: 0.45 ms$^{-1}$; Squat: 0.60 ms$^{-1}$	1	2	45.6522	0.25	5	Bench press	177	83.1	26	0	1	10
Low pre-set velocity loss	2	Bench press: 0.45 ms$^{-1}$; Squat: 0.60 ms$^{-1}$	2	2	23.913	0.35	4	Bench press	177	83.1	26	0	1	10
Low pre-set velocity loss	2	Bench press: 0.45 ms$^{-1}$; Squat: 0.60 ms$^{-1}$	3	2	26.087	0.34	4	Bench press	177	83.1	26	0	1	10
Low pre-set velocity loss	2	Bench press: 0.45 ms$^{-1}$; Squat: 0.60 ms$^{-1}$	4	2	32.6087	0.31	3	Bench press	177	83.1	26	0	1	10
Low pre-set velocity loss	2	Bench press: 0.45 ms$^{-1}$; Squat: 0.60 ms$^{-1}$	5	1	21.7391	0.36	4	Bench press	177	83.1	26	0	1	10
Low pre-set velocity loss	2	Bench press: 0.38 ms$^{-1}$; Squat: 0.49 ms$^{-1}$	1	2	31.5789	0.26	3	Bench press	177	83.1	26	0	1	10
Low pre-set velocity loss	2	Bench press: 0.38 ms$^{-1}$; Squat: 0.49 ms$^{-1}$	2	1	36.8421	0.24	3	Bench press	177	83.1	26	0	1	10
Low pre-set velocity loss	2	Bench press: 0.38 ms$^{-1}$; Squat: 0.49 ms$^{-1}$	3	1	44.7368	0.21	3	Bench press	177	83.1	26	0	1	10
Low pre-set velocity loss	2	Bench press: 0.38 ms$^{-1}$; Squat: 0.49 ms$^{-1}$	4	1	21.0526	0.3	2	Bench press	177	83.1	26	0	1	10
Low pre-set velocity loss	2	Bench press: 0.38 ms$^{-1}$; Squat: 0.49 ms$^{-1}$	5	1	23.6842	0.29	2	Bench press	177	83.1	26	0	1	10
Low pre-set velocity loss	2	Bench press: 0.38 ms$^{-1}$; Squat: 0.49 ms$^{-1}$	6	1	21.0526	0.3	2	Bench press	177	83.1	26	0	1	10
Low pre-set velocity loss	2	Bench press: 0.53 ms$^{-1}$; Squat: 0.70 ms$^{-1}$	1	2	31.4815	0.37	6	Bench press	177	83.1	26	0	1	10
Low pre-set velocity loss	2	Bench press: 0.53 ms$^{-1}$; Squat: 0.70 ms$^{-1}$	2	1	48.1481	0.28	6	Bench press	177	83.1	26	0	1	10
Low pre-set velocity loss	2	Bench press: 0.53 ms$^{-1}$; Squat: 0.70 ms$^{-1}$	3	2	33.3333	0.36	5	Bench press	177	83.1	26	0	1	10
Low pre-set velocity loss	2	Bench press: 0.53 ms$^{-1}$; Squat: 0.70 ms$^{-1}$	4	2	35.1852	0.35	5	Bench press	177	83.1	26	0	1	10
Low pre-set velocity loss	2	Bench press: 0.53 ms$^{-1}$; Squat: 0.70 ms$^{-1}$	5	2	25.9259	0.4	4	Bench press	177	83.1	26	0	1	10
Low pre-set velocity loss	2	Bench press: 0.53 ms$^{-1}$; Squat: 0.70 ms$^{-1}$	6	2	22.2222	0.42	3	Bench press	177	83.1	26	0	1	10
Low pre-set velocity loss	3	Bench press: 0.45 ms$^{-1}$; Squat: 0.60 ms$^{-1}$	1	1	36.1702	0.3	4	Bench press	177	83.1	26	0	1	10
Low pre-set velocity loss	3	Bench press: 0.45 ms$^{-1}$; Squat: 0.60 ms$^{-1}$	2	1	36.1702	0.3	4	Bench press	177	83.1	26	0	1	10
Low pre-set velocity loss	3	Bench press: 0.45 ms$^{-1}$; Squat: 0.60 ms$^{-1}$	3	1	31.9149	0.32	4	Bench press	177	83.1	26	0	1	10
Low pre-set velocity loss	3	Bench press: 0.45 ms$^{-1}$; Squat: 0.60 ms$^{-1}$	4	1	19.1489	0.38	3	Bench press	177	83.1	26	0	1	10
Low pre-set velocity loss	3	Bench press: 0.45 ms$^{-1}$; Squat: 0.60 ms$^{-1}$	5	1	21.2766	0.37	3	Bench press	177	83.1	26	0	1	10
Low pre-set velocity loss	3	Bench press: 0.38 ms$^{-1}$; Squat: 0.49 ms$^{-1}$	1	1	43.5897	0.22	3	Bench press	177	83.1	26	0	1	10
Low pre-set velocity loss	3	Bench press: 0.38 ms$^{-1}$; Squat: 0.49 ms$^{-1}$	2	0	35.8974	0.25	3	Bench press	177	83.1	26	0	1	10
Low pre-set velocity loss	3	Bench press: 0.38 ms$^{-1}$; Squat: 0.49 ms$^{-1}$	3	1	15.3846	0.33	2	Bench press	177	83.1	26	0	1	10
Low pre-set velocity loss	3	Bench press: 0.38 ms$^{-1}$; Squat: 0.49 ms$^{-1}$	4	1	20.5128	0.31	2	Bench press	177	83.1	26	0	1	10
Low pre-set velocity loss	3	Bench press: 0.38 ms$^{-1}$; Squat: 0.49 ms$^{-1}$	5	1	17.9487	0.32	2	Bench press	177	83.1	26	0	1	10
Low pre-set velocity loss	3	Bench press: 0.38 ms$^{-1}$; Squat: 0.49 ms$^{-1}$	6	0	28.2051	0.28	2	Bench press	177	83.1	26	0	1	10
Low pre-set velocity loss	3	Bench press: 0.53 ms$^{-1}$; Squat: 0.70 ms$^{-1}$	1	2	35.8491	0.34	5	Bench press	177	83.1	26	0	1	10
Low pre-set velocity loss	3	Bench press: 0.53 ms$^{-1}$; Squat: 0.70 ms$^{-1}$	2	2	35.8491	0.34	5	Bench press	177	83.1	26	0	1	10
Low pre-set velocity loss	3	Bench press: 0.53 ms$^{-1}$; Squat: 0.70 ms$^{-1}$	3	2	37.7358	0.33	4	Bench press	177	83.1	26	0	1	10
Low pre-set velocity loss	3	Bench press: 0.53 ms$^{-1}$; Squat: 0.70 ms$^{-1}$	4	2	24.5283	0.4	3	Bench press	177	83.1	26	0	1	10
Low pre-set velocity loss	3	Bench press: 0.53 ms$^{-1}$; Squat: 0.70 ms$^{-1}$	5	2	22.6415	0.41	3	Bench press	177	83.1	26	0	1	10
Low pre-set velocity loss	3	Bench press: 0.53 ms$^{-1}$; Squat: 0.70 ms$^{-1}$	6	1	37.7358	0.33	4	Bench press	177	83.1	26	0	1	10
Low pre-set velocity loss	4	Bench press: 0.45 ms$^{-1}$; Squat: 0.60 ms$^{-1}$	1	1	44.6809	0.26	5	Bench press	177	83.1	26	0	1	10
Low pre-set velocity loss	4	Bench press: 0.45 ms$^{-1}$; Squat: 0.60 ms$^{-1}$	2	1	40.4255	0.28	4	Bench press	177	83.1	26	0	1	10
Low pre-set velocity loss	4	Bench press: 0.45 ms$^{-1}$; Squat: 0.60 ms$^{-1}$	3	1	29.7872	0.33	3	Bench press	177	83.1	26	0	1	10
Low pre-set velocity loss	4	Bench press: 0.45 ms$^{-1}$; Squat: 0.60 ms$^{-1}$	4	1	42.5532	0.27	4	Bench press	177	83.1	26	0	1	10
Low pre-set velocity loss	4	Bench press: 0.45 ms$^{-1}$; Squat: 0.60 ms$^{-1}$	5	2	14.8936	0.4	2	Bench press	177	83.1	26	0	1	10
Low pre-set velocity loss	4	Bench press: 0.38 ms$^{-1}$; Squat: 0.49 ms$^{-1}$	1	0	33.3333	0.22	2	Bench press	177	83.1	26	0	1	10
Low pre-set velocity loss	4	Bench press: 0.38 ms$^{-1}$; Squat: 0.49 ms$^{-1}$	2	0	18.1818	0.27	2	Bench press	177	83.1	26	0	1	10
Low pre-set velocity loss	4	Bench press: 0.38 ms$^{-1}$; Squat: 0.49 ms$^{-1}$	3	0	15.1515	0.28	2	Bench press	177	83.1	26	0	1	10
Low pre-set velocity loss	4	Bench press: 0.38 ms$^{-1}$; Squat: 0.49 ms$^{-1}$	4	0	18.1818	0.27	2	Bench press	177	83.1	26	0	1	10
Low pre-set velocity loss	4	Bench press: 0.38 ms$^{-1}$; Squat: 0.49 ms$^{-1}$	5	0	45.4545	0.18	2	Bench press	177	83.1	26	0	1	10
Low pre-set velocity loss	4	Bench press: 0.53 ms$^{-1}$; Squat: 0.70 ms$^{-1}$	1	1	35.8491	0.34	5	Bench press	177	83.1	26	0	1	10
Low pre-set velocity loss	4	Bench press: 0.53 ms$^{-1}$; Squat: 0.70 ms$^{-1}$	2	1	37.7358	0.33	5	Bench press	177	83.1	26	0	1	10
Low pre-set velocity loss	4	Bench press: 0.53 ms$^{-1}$; Squat: 0.70 ms$^{-1}$	3	2	22.6415	0.41	4	Bench press	177	83.1	26	0	1	10
Low pre-set velocity loss	4	Bench press: 0.53 ms$^{-1}$; Squat: 0.70 ms$^{-1}$	4	1	43.3962	0.3	5	Bench press	177	83.1	26	0	1	10
Low pre-set velocity loss	4	Bench press: 0.53 ms$^{-1}$; Squat: 0.70 ms$^{-1}$	5	3	22.6415	0.41	3	Bench press	177	83.1	26	0	1	10
Low pre-set velocity loss	4	Bench press: 0.53 ms$^{-1}$; Squat: 0.70 ms$^{-1}$	6	1	16.9811	0.44	4	Bench press	177	83.1	26	0	1	10
Low pre-set velocity loss	4	Bench press: 0.53 ms$^{-1}$; Squat: 0.70 ms$^{-1}$	7	1	32.0755	0.36	4	Bench press	177	83.1	26	0	1	10
Low pre-set velocity loss	5	Bench press: 0.45 ms$^{-1}$; Squat: 0.60 ms$^{-1}$	1	2	29.1667	0.34	3	Bench press	177	83.1	26	0	1	10
Low pre-set velocity loss	5	Bench press: 0.45 ms$^{-1}$; Squat: 0.60 ms$^{-1}$	2	1	50	0.24	4	Bench press	177	83.1	26	0	1	10
Low pre-set velocity loss	5	Bench press: 0.45 ms$^{-1}$; Squat: 0.60 ms$^{-1}$	3	2	27.0833	0.35	3	Bench press	177	83.1	26	0	1	10
Low pre-set velocity loss	5	Bench press: 0.45 ms$^{-1}$; Squat: 0.60 ms$^{-1}$	4	2	27.0833	0.35	3	Bench press	177	83.1	26	0	1	10
Low pre-set velocity loss	5	Bench press: 0.45 ms$^{-1}$; Squat: 0.60 ms$^{-1}$	5	2	31.25	0.33	3	Bench press	177	83.1	26	0	1	10
Low pre-set velocity loss	5	Bench press: 0.45 ms$^{-1}$; Squat: 0.60 ms$^{-1}$	6	1	37.5	0.3	3	Bench press	177	83.1	26	0	1	10
Low pre-set velocity loss	5	Bench press: 0.45 ms$^{-1}$; Squat: 0.60 ms$^{-1}$	7	1	41.6667	0.28	3	Bench press	177	83.1	26	0	1	10
Low pre-set velocity loss	5	Bench press: 0.45 ms$^{-1}$; Squat: 0.60 ms$^{-1}$	8	1	22.9167	0.37	2	Bench press	177	83.1	26	0	1	10
Low pre-set velocity loss	5	Bench press: 0.38 ms$^{-1}$; Squat: 0.49 ms$^{-1}$	1	0	39.0244	0.25	3	Bench press	177	83.1	26	0	1	10
Low pre-set velocity loss	5	Bench press: 0.38 ms$^{-1}$; Squat: 0.49 ms$^{-1}$	2	0	39.0244	0.25	3	Bench press	177	83.1	26	0	1	10
Low pre-set velocity loss	5	Bench press: 0.38 ms$^{-1}$; Squat: 0.49 ms$^{-1}$	3	0	39.0244	0.25	3	Bench press	177	83.1	26	0	1	10
Low pre-set velocity loss	5	Bench press: 0.38 ms$^{-1}$; Squat: 0.49 ms$^{-1}$	4	1	39.0244	0.25	3	Bench press	177	83.1	26	0	1	10
Low pre-set velocity loss	5	Bench press: 0.38 ms$^{-1}$; Squat: 0.49 ms$^{-1}$	5	1	9.7561	0.37	2	Bench press	177	83.1	26	0	1	10
Low pre-set velocity loss	5	Bench press: 0.53 ms$^{-1}$; Squat: 0.70 ms$^{-1}$	1	1	33.9286	0.37	5	Bench press	177	83.1	26	0	1	10
Low pre-set velocity loss	5	Bench press: 0.53 ms$^{-1}$; Squat: 0.70 ms$^{-1}$	2	2	30.3571	0.39	5	Bench press	177	83.1	26	0	1	10
Low pre-set velocity loss	5	Bench press: 0.53 ms$^{-1}$; Squat: 0.70 ms$^{-1}$	3	2	25	0.42	4	Bench press	177	83.1	26	0	1	10
Low pre-set velocity loss	5	Bench press: 0.53 ms$^{-1}$; Squat: 0.70 ms$^{-1}$	4	2	35.7143	0.36	4	Bench press	177	83.1	26	0	1	10
Low pre-set velocity loss	5	Bench press: 0.53 ms$^{-1}$; Squat: 0.70 ms$^{-1}$	5	2	37.5	0.35	4	Bench press	177	83.1	26	0	1	10
Low pre-set velocity loss	5	Bench press: 0.53 ms$^{-1}$; Squat: 0.70 ms$^{-1}$	6	3	23.2143	0.43	3	Bench press	177	83.1	26	0	1	10
Low pre-set velocity loss	5	Bench press: 0.53 ms$^{-1}$; Squat: 0.70 ms$^{-1}$	7	2	33.9286	0.37	4	Bench press	177	83.1	26	0	1	10
Low pre-set velocity loss	6	Bench press: 0.45 ms$^{-1}$; Squat: 0.60 ms$^{-1}$	1	1	34.0426	0.31	3	Bench press	177	83.1	26	0	1	10
Low pre-set velocity loss	6	Bench press: 0.45 ms$^{-1}$; Squat: 0.60 ms$^{-1}$	2	0	46.8085	0.25	4	Bench press	177	83.1	26	0	1	10
Low pre-set velocity loss	6	Bench press: 0.45 ms$^{-1}$; Squat: 0.60 ms$^{-1}$	3	1	25.5319	0.35	3	Bench press	177	83.1	26	0	1	10
Low pre-set velocity loss	6	Bench press: 0.45 ms$^{-1}$; Squat: 0.60 ms$^{-1}$	4	0	44.6809	0.26	4	Bench press	177	83.1	26	0	1	10
Low pre-set velocity loss	6	Bench press: 0.45 ms$^{-1}$; Squat: 0.60 ms$^{-1}$	5	2	21.2766	0.37	2	Bench press	177	83.1	26	0	1	10
Low pre-set velocity loss	6	Bench press: 0.45 ms$^{-1}$; Squat: 0.60 ms$^{-1}$	6	0	14.8936	0.4	2	Bench press	177	83.1	26	0	1	10
Low pre-set velocity loss	6	Bench press: 0.45 ms$^{-1}$; Squat: 0.60 ms$^{-1}$	7	1	46.8085	0.25	3	Bench press	177	83.1	26	0	1	10
Low pre-set velocity loss	6	Bench press: 0.38 ms$^{-1}$; Squat: 0.49 ms$^{-1}$	1	0	33.3333	0.24	2	Bench press	177	83.1	26	0	1	10
Low pre-set velocity loss	6	Bench press: 0.38 ms$^{-1}$; Squat: 0.49 ms$^{-1}$	2	0	30.5556	0.25	2	Bench press	177	83.1	26	0	1	10
Low pre-set velocity loss	6	Bench press: 0.38 ms$^{-1}$; Squat: 0.49 ms$^{-1}$	3	0	44.4444	0.2	2	Bench press	177	83.1	26	0	1	10
Low pre-set velocity loss	6	Bench press: 0.38 ms$^{-1}$; Squat: 0.49 ms$^{-1}$	4	0	36.1111	0.23	2	Bench press	177	83.1	26	0	1	10
Low pre-set velocity loss	6	Bench press: 0.38 ms$^{-1}$; Squat: 0.49 ms$^{-1}$	5	0	8.33333	0.33	1	Bench press	177	83.1	26	0	1	10
Low pre-set velocity loss	6	Bench press: 0.38 ms$^{-1}$; Squat: 0.49 ms$^{-1}$	6	0	27.7778	0.26	2	Bench press	177	83.1	26	0	1	10
Low pre-set velocity loss	6	Bench press: 0.53 ms$^{-1}$; Squat: 0.70 ms$^{-1}$	1	1	35.0877	0.37	6	Bench press	177	83.1	26	0	1	10
Low pre-set velocity loss	6	Bench press: 0.53 ms$^{-1}$; Squat: 0.70 ms$^{-1}$	2	3	26.3158	0.42	5	Bench press	177	83.1	26	0	1	10
Low pre-set velocity loss	6	Bench press: 0.53 ms$^{-1}$; Squat: 0.70 ms$^{-1}$	3	2	29.8246	0.4	5	Bench press	177	83.1	26	0	1	10
Low pre-set velocity loss	6	Bench press: 0.53 ms$^{-1}$; Squat: 0.70 ms$^{-1}$	4	3	26.3158	0.42	5	Bench press	177	83.1	26	0	1	10
Low pre-set velocity loss	6	Bench press: 0.53 ms$^{-1}$; Squat: 0.70 ms$^{-1}$	5	2	36.8421	0.36	5	Bench press	177	83.1	26	0	1	10
High pre-set velocity loss	1	Bench press: 0.45 ms$^{-1}$; Squat: 0.60 ms$^{-1}$	1	0	72.093	0.12	4	Bench press	177	83.1	26	0	2	10
High pre-set velocity loss	1	Bench press: 0.45 ms$^{-1}$; Squat: 0.60 ms$^{-1}$	2	0	58.1395	0.18	4	Bench press	177	83.1	26	0	2	10
High pre-set velocity loss	1	Bench press: 0.38 ms$^{-1}$; Squat: 0.49 ms$^{-1}$	1	0	48.5714	0.18	3	Bench press	177	83.1	26	0	2	10
High pre-set velocity loss	1	Bench press: 0.38 ms$^{-1}$; Squat: 0.49 ms$^{-1}$	2	0	28.5714	0.25	2	Bench press	177	83.1	26	0	2	10
High pre-set velocity loss	1	Bench press: 0.53 ms$^{-1}$; Squat: 0.70 ms$^{-1}$	1	0	68.5185	0.17	7	Bench press	177	83.1	26	0	2	10
High pre-set velocity loss	1	Bench press: 0.53 ms$^{-1}$; Squat: 0.70 ms$^{-1}$	2	1	55.5556	0.24	6	Bench press	177	83.1	26	0	2	10
High pre-set velocity loss	2	Bench press: 0.45 ms$^{-1}$; Squat: 0.60 ms$^{-1}$	1	0	58.3333	0.2	5	Bench press	177	83.1	26	0	2	10
High pre-set velocity loss	2	Bench press: 0.45 ms$^{-1}$; Squat: 0.60 ms$^{-1}$	2	0	68.75	0.15	5	Bench press	177	83.1	26	0	2	10
High pre-set velocity loss	2	Bench press: 0.45 ms$^{-1}$; Squat: 0.60 ms$^{-1}$	3	0	64.5833	0.17	5	Bench press	177	83.1	26	0	2	10
High pre-set velocity loss	2	Bench press: 0.38 ms$^{-1}$; Squat: 0.49 ms$^{-1}$	1	0	47.3684	0.2	3	Bench press	177	83.1	26	0	2	10
High pre-set velocity loss	2	Bench press: 0.38 ms$^{-1}$; Squat: 0.49 ms$^{-1}$	2	0	60.5263	0.15	3	Bench press	177	83.1	26	0	2	10
High pre-set velocity loss	2	Bench press: 0.38 ms$^{-1}$; Squat: 0.49 ms$^{-1}$	3	0	50	0.19	3	Bench press	177	83.1	26	0	2	10
High pre-set velocity loss	2	Bench press: 0.53 ms$^{-1}$; Squat: 0.70 ms$^{-1}$	1	0	73.5849	0.14	6	Bench press	177	83.1	26	0	2	10
High pre-set velocity loss	2	Bench press: 0.53 ms$^{-1}$; Squat: 0.70 ms$^{-1}$	2	0	79.2453	0.11	6	Bench press	177	83.1	26	0	2	10
High pre-set velocity loss	3	Bench press: 0.45 ms$^{-1}$; Squat: 0.60 ms$^{-1}$	1	0	78.2609	0.1	5	Bench press	177	83.1	26	0	2	10
High pre-set velocity loss	3	Bench press: 0.45 ms$^{-1}$; Squat: 0.60 ms$^{-1}$	2	0	52.1739	0.22	4	Bench press	177	83.1	26	0	2	10
High pre-set velocity loss	3	Bench press: 0.45 ms$^{-1}$; Squat: 0.60 ms$^{-1}$	3	0	69.5652	0.14	4	Bench press	177	83.1	26	0	2	10
High pre-set velocity loss	3	Bench press: 0.38 ms$^{-1}$; Squat: 0.49 ms$^{-1}$	1	0	71.7949	0.11	3	Bench press	177	83.1	26	0	2	10
High pre-set velocity loss	3	Bench press: 0.38 ms$^{-1}$; Squat: 0.49 ms$^{-1}$	2	0	28.2051	0.28	3	Bench press	177	83.1	26	0	2	10
High pre-set velocity loss	3	Bench press: 0.38 ms$^{-1}$; Squat: 0.49 ms$^{-1}$	3	0	58.9744	0.16	3	Bench press	177	83.1	26	0	2	10
High pre-set velocity loss	3	Bench press: 0.53 ms$^{-1}$; Squat: 0.70 ms$^{-1}$	1	0	66.6667	0.17	7	Bench press	177	83.1	26	0	2	10
High pre-set velocity loss	3	Bench press: 0.53 ms$^{-1}$; Squat: 0.70 ms$^{-1}$	2	1	52.9412	0.24	6	Bench press	177	83.1	26	0	2	10
High pre-set velocity loss	3	Bench press: 0.53 ms$^{-1}$; Squat: 0.70 ms$^{-1}$	3	0	66.6667	0.17	7	Bench press	177	83.1	26	0	2	10
High pre-set velocity loss	4	Bench press: 0.45 ms$^{-1}$; Squat: 0.60 ms$^{-1}$	1	0	44.6809	0.26	4	Bench press	177	83.1	26	0	2	10
High pre-set velocity loss	4	Bench press: 0.45 ms$^{-1}$; Squat: 0.60 ms$^{-1}$	2	0	57.4468	0.2	5	Bench press	177	83.1	26	0	2	10
High pre-set velocity loss	4	Bench press: 0.45 ms$^{-1}$; Squat: 0.60 ms$^{-1}$	3	0	72.3404	0.13	4	Bench press	177	83.1	26	0	2	10
High pre-set velocity loss	4	Bench press: 0.38 ms$^{-1}$; Squat: 0.49 ms$^{-1}$	1	0	40.5405	0.22	2	Bench press	177	83.1	26	0	2	10
High pre-set velocity loss	4	Bench press: 0.38 ms$^{-1}$; Squat: 0.49 ms$^{-1}$	2	0	43.2432	0.21	3	Bench press	177	83.1	26	0	2	10
High pre-set velocity loss	4	Bench press: 0.38 ms$^{-1}$; Squat: 0.49 ms$^{-1}$	3	0	43.2432	0.21	2	Bench press	177	83.1	26	0	2	10
High pre-set velocity loss	4	Bench press: 0.53 ms$^{-1}$; Squat: 0.70 ms$^{-1}$	1	0	63.4615	0.19	8	Bench press	177	83.1	26	0	2	10
High pre-set velocity loss	4	Bench press: 0.53 ms$^{-1}$; Squat: 0.70 ms$^{-1}$	2	0	76.9231	0.12	6	Bench press	177	83.1	26	0	2	10
High pre-set velocity loss	4	Bench press: 0.53 ms$^{-1}$; Squat: 0.70 ms$^{-1}$	3	1	51.9231	0.25	6	Bench press	177	83.1	26	0	2	10
High pre-set velocity loss	5	Bench press: 0.45 ms$^{-1}$; Squat: 0.60 ms$^{-1}$	1	0	59.0909	0.18	4	Bench press	177	83.1	26	0	2	10
High pre-set velocity loss	5	Bench press: 0.45 ms$^{-1}$; Squat: 0.60 ms$^{-1}$	2	0	45.4545	0.24	4	Bench press	177	83.1	26	0	2	10
High pre-set velocity loss	5	Bench press: 0.45 ms$^{-1}$; Squat: 0.60 ms$^{-1}$	3	0	54.5455	0.2	3	Bench press	177	83.1	26	0	2	10
High pre-set velocity loss	5	Bench press: 0.45 ms$^{-1}$; Squat: 0.60 ms$^{-1}$	4	0	63.6364	0.16	3	Bench press	177	83.1	26	0	2	10
High pre-set velocity loss	5	Bench press: 0.38 ms$^{-1}$; Squat: 0.49 ms$^{-1}$	1	0	35.1351	0.24	2	Bench press	177	83.1	26	0	2	10
High pre-set velocity loss	5	Bench press: 0.38 ms$^{-1}$; Squat: 0.49 ms$^{-1}$	2	0	54.0541	0.17	3	Bench press	177	83.1	26	0	2	10
High pre-set velocity loss	5	Bench press: 0.38 ms$^{-1}$; Squat: 0.49 ms$^{-1}$	3	0	62.1622	0.14	3	Bench press	177	83.1	26	0	2	10
High pre-set velocity loss	5	Bench press: 0.38 ms$^{-1}$; Squat: 0.49 ms$^{-1}$	4	0	70.2703	0.11	2	Bench press	177	83.1	26	0	2	10
High pre-set velocity loss	5	Bench press: 0.53 ms$^{-1}$; Squat: 0.70 ms$^{-1}$	1	0	68	0.16	5	Bench press	177	83.1	26	0	2	10
High pre-set velocity loss	5	Bench press: 0.53 ms$^{-1}$; Squat: 0.70 ms$^{-1}$	2	0	54	0.23	5	Bench press	177	83.1	26	0	2	10
High pre-set velocity loss	5	Bench press: 0.53 ms$^{-1}$; Squat: 0.70 ms$^{-1}$	3	1	36	0.32	4	Bench press	177	83.1	26	0	2	10
High pre-set velocity loss	5	Bench press: 0.53 ms$^{-1}$; Squat: 0.70 ms$^{-1}$	4	0	74	0.13	4	Bench press	177	83.1	26	0	2	10
High pre-set velocity loss	6	Bench press: 0.45 ms$^{-1}$; Squat: 0.60 ms$^{-1}$	1	1	46.1538	0.21	4	Bench press	177	83.1	26	0	2	10
High pre-set velocity loss	6	Bench press: 0.45 ms$^{-1}$; Squat: 0.60 ms$^{-1}$	2	0	61.5385	0.15	4	Bench press	177	83.1	26	0	2	10
High pre-set velocity loss	6	Bench press: 0.45 ms$^{-1}$; Squat: 0.60 ms$^{-1}$	3	1	30.7692	0.27	3	Bench press	177	83.1	26	0	2	10
High pre-set velocity loss	6	Bench press: 0.45 ms$^{-1}$; Squat: 0.60 ms$^{-1}$	4	0	74.359	0.1	3	Bench press	177	83.1	26	0	2	10
High pre-set velocity loss	6	Bench press: 0.38 ms$^{-1}$; Squat: 0.49 ms$^{-1}$	1	0	55.2632	0.17	3	Bench press	177	83.1	26	0	2	10
High pre-set velocity loss	6	Bench press: 0.38 ms$^{-1}$; Squat: 0.49 ms$^{-1}$	2	0	50	0.19	3	Bench press	177	83.1	26	0	2	10
High pre-set velocity loss	6	Bench press: 0.38 ms$^{-1}$; Squat: 0.49 ms$^{-1}$	3	0	36.8421	0.24	2	Bench press	177	83.1	26	0	2	10
High pre-set velocity loss	6	Bench press: 0.53 ms$^{-1}$; Squat: 0.70 ms$^{-1}$	1	0	66.6667	0.18	6	Bench press	177	83.1	26	0	2	10
High pre-set velocity loss	6	Bench press: 0.53 ms$^{-1}$; Squat: 0.70 ms$^{-1}$	2	0	59.2593	0.22	6	Bench press	177	83.1	26	0	2	10
High pre-set velocity loss	6	Bench press: 0.53 ms$^{-1}$; Squat: 0.70 ms$^{-1}$	3	0	72.2222	0.15	6	Bench press	177	83.1	26	0	2	10
High pre-set velocity loss	6	Bench press: 0.53 ms$^{-1}$; Squat: 0.70 ms$^{-1}$	4	0	70.3704	0.16	6	Bench press	177	83.1	26	0	2	10
Low pre-set velocity loss	1	Bench press: 0.45 ms$^{-1}$; Squat: 0.60 ms$^{-1}$	1	1	26.6667	0.44	3	Squat	177	83.1	26	0	1	10
Low pre-set velocity loss	1	Bench press: 0.45 ms$^{-1}$; Squat: 0.60 ms$^{-1}$	2	1	16.6667	0.5	3	Squat	177	83.1	26	0	1	10
Low pre-set velocity loss	1	Bench press: 0.45 ms$^{-1}$; Squat: 0.60 ms$^{-1}$	3	0	50	0.3	3	Squat	177	83.1	26	0	1	10
Low pre-set velocity loss	1	Bench press: 0.45 ms$^{-1}$; Squat: 0.60 ms$^{-1}$	4	0	43.3333	0.34	2	Squat	177	83.1	26	0	1	10
Low pre-set velocity loss	1	Bench press: 0.45 ms$^{-1}$; Squat: 0.60 ms$^{-1}$	5	1	11.6667	0.53	1	Squat	177	83.1	26	0	1	10
Low pre-set velocity loss	1	Bench press: 0.45 ms$^{-1}$; Squat: 0.60 ms$^{-1}$	6	1	10	0.54	1	Squat	177	83.1	26	0	1	10
Low pre-set velocity loss	1	Bench press: 0.38 ms$^{-1}$; Squat: 0.49 ms$^{-1}$	1	0	33.3333	0.32	2	Squat	177	83.1	26	0	1	10
Low pre-set velocity loss	1	Bench press: 0.38 ms$^{-1}$; Squat: 0.49 ms$^{-1}$	2	1	0	0.48	1	Squat	177	83.1	26	0	1	10
Low pre-set velocity loss	1	Bench press: 0.38 ms$^{-1}$; Squat: 0.49 ms$^{-1}$	3	1	10.4167	0.43	1	Squat	177	83.1	26	0	1	10
Low pre-set velocity loss	1	Bench press: 0.38 ms$^{-1}$; Squat: 0.49 ms$^{-1}$	4	1	20.8333	0.38	1	Squat	177	83.1	26	0	1	10
Low pre-set velocity loss	1	Bench press: 0.38 ms$^{-1}$; Squat: 0.49 ms$^{-1}$	5	1	22.9167	0.37	1	Squat	177	83.1	26	0	1	10
Low pre-set velocity loss	1	Bench press: 0.38 ms$^{-1}$; Squat: 0.49 ms$^{-1}$	6	1	20.8333	0.38	1	Squat	177	83.1	26	0	1	10
Low pre-set velocity loss	1	Bench press: 0.38 ms$^{-1}$; Squat: 0.49 ms$^{-1}$	7	0	27.0833	0.35	1	Squat	177	83.1	26	0	1	10
Low pre-set velocity loss	1	Bench press: 0.53 ms$^{-1}$; Squat: 0.70 ms$^{-1}$	1	1	45.7143	0.38	6	Squat	177	83.1	26	0	1	10
Low pre-set velocity loss	1	Bench press: 0.53 ms$^{-1}$; Squat: 0.70 ms$^{-1}$	2	3	20	0.56	3	Squat	177	83.1	26	0	1	10
Low pre-set velocity loss	1	Bench press: 0.53 ms$^{-1}$; Squat: 0.70 ms$^{-1}$	3	3	21.4286	0.55	3	Squat	177	83.1	26	0	1	10
Low pre-set velocity loss	1	Bench press: 0.53 ms$^{-1}$; Squat: 0.70 ms$^{-1}$	4	3	10	0.63	2	Squat	177	83.1	26	0	1	10
Low pre-set velocity loss	1	Bench press: 0.53 ms$^{-1}$; Squat: 0.70 ms$^{-1}$	5	3	15.7143	0.59	2	Squat	177	83.1	26	0	1	10
Low pre-set velocity loss	1	Bench press: 0.53 ms$^{-1}$; Squat: 0.70 ms$^{-1}$	6	3	15.7143	0.59	2	Squat	177	83.1	26	0	1	10
Low pre-set velocity loss	1	Bench press: 0.53 ms$^{-1}$; Squat: 0.70 ms$^{-1}$	7	2	18.5714	0.57	2	Squat	177	83.1	26	0	1	10
Low pre-set velocity loss	2	Bench press: 0.45 ms$^{-1}$; Squat: 0.60 ms$^{-1}$	1	2	31.746	0.43	4	Squat	177	83.1	26	0	1	10
Low pre-set velocity loss	2	Bench press: 0.45 ms$^{-1}$; Squat: 0.60 ms$^{-1}$	2	3	9.52381	0.57	2	Squat	177	83.1	26	0	1	10
Low pre-set velocity loss	2	Bench press: 0.45 ms$^{-1}$; Squat: 0.60 ms$^{-1}$	3	2	15.873	0.53	3	Squat	177	83.1	26	0	1	10
Low pre-set velocity loss	2	Bench press: 0.45 ms$^{-1}$; Squat: 0.60 ms$^{-1}$	4	2	23.8095	0.48	2	Squat	177	83.1	26	0	1	10
Low pre-set velocity loss	2	Bench press: 0.45 ms$^{-1}$; Squat: 0.60 ms$^{-1}$	5	1	20.6349	0.5	3	Squat	177	83.1	26	0	1	10
Low pre-set velocity loss	2	Bench press: 0.45 ms$^{-1}$; Squat: 0.60 ms$^{-1}$	6	1	15.873	0.53	2	Squat	177	83.1	26	0	1	10
Low pre-set velocity loss	2	Bench press: 0.45 ms$^{-1}$; Squat: 0.60 ms$^{-1}$	7	1	15.873	0.53	2	Squat	177	83.1	26	0	1	10
Low pre-set velocity loss	2	Bench press: 0.45 ms$^{-1}$; Squat: 0.60 ms$^{-1}$	8	1	25.3968	0.47	3	Squat	177	83.1	26	0	1	10
Low pre-set velocity loss	2	Bench press: 0.38 ms$^{-1}$; Squat: 0.49 ms$^{-1}$	1	1	16.3265	0.41	2	Squat	177	83.1	26	0	1	10
Low pre-set velocity loss	2	Bench press: 0.38 ms$^{-1}$; Squat: 0.49 ms$^{-1}$	2	1	18.3673	0.4	2	Squat	177	83.1	26	0	1	10
Low pre-set velocity loss	2	Bench press: 0.38 ms$^{-1}$; Squat: 0.49 ms$^{-1}$	3	0	26.5306	0.36	2	Squat	177	83.1	26	0	1	10
Low pre-set velocity loss	2	Bench press: 0.38 ms$^{-1}$; Squat: 0.49 ms$^{-1}$	4	0	12.2449	0.43	1	Squat	177	83.1	26	0	1	10
Low pre-set velocity loss	2	Bench press: 0.38 ms$^{-1}$; Squat: 0.49 ms$^{-1}$	5	0	32.6531	0.33	2	Squat	177	83.1	26	0	1	10
Low pre-set velocity loss	2	Bench press: 0.38 ms$^{-1}$; Squat: 0.49 ms$^{-1}$	7	0	16.3265	0.41	1	Squat	177	83.1	26	0	1	10
Low pre-set velocity loss	2	Bench press: 0.53 ms$^{-1}$; Squat: 0.70 ms$^{-1}$	1	2	23.5294	0.52	6	Squat	177	83.1	26	0	1	10
Low pre-set velocity loss	2	Bench press: 0.53 ms$^{-1}$; Squat: 0.70 ms$^{-1}$	2	2	20.5882	0.54	5	Squat	177	83.1	26	0	1	10
Low pre-set velocity loss	2	Bench press: 0.53 ms$^{-1}$; Squat: 0.70 ms$^{-1}$	3	2	17.6471	0.56	4	Squat	177	83.1	26	0	1	10
Low pre-set velocity loss	2	Bench press: 0.53 ms$^{-1}$; Squat: 0.70 ms$^{-1}$	4	2	14.7059	0.58	4	Squat	177	83.1	26	0	1	10
Low pre-set velocity loss	2	Bench press: 0.53 ms$^{-1}$; Squat: 0.70 ms$^{-1}$	5	2	23.5294	0.52	4	Squat	177	83.1	26	0	1	10
Low pre-set velocity loss	2	Bench press: 0.53 ms$^{-1}$; Squat: 0.70 ms$^{-1}$	6	2	19.1176	0.55	3	Squat	177	83.1	26	0	1	10
Low pre-set velocity loss	2	Bench press: 0.53 ms$^{-1}$; Squat: 0.70 ms$^{-1}$	7	2	23.5294	0.52	3	Squat	177	83.1	26	0	1	10
Low pre-set velocity loss	2	Bench press: 0.53 ms$^{-1}$; Squat: 0.70 ms$^{-1}$	8	2	25	0.51	3	Squat	177	83.1	26	0	1	10
Low pre-set velocity loss	3	Bench press: 0.45 ms$^{-1}$; Squat: 0.60 ms$^{-1}$	1	2	18.3333	0.49	3	Squat	177	83.1	26	0	1	10
Low pre-set velocity loss	3	Bench press: 0.45 ms$^{-1}$; Squat: 0.60 ms$^{-1}$	2	1	28.3333	0.43	3	Squat	177	83.1	26	0	1	10
Low pre-set velocity loss	3	Bench press: 0.45 ms$^{-1}$; Squat: 0.60 ms$^{-1}$	3	2	13.3333	0.52	2	Squat	177	83.1	26	0	1	10
Low pre-set velocity loss	3	Bench press: 0.45 ms$^{-1}$; Squat: 0.60 ms$^{-1}$	4	2	21.6667	0.47	3	Squat	177	83.1	26	0	1	10
Low pre-set velocity loss	3	Bench press: 0.45 ms$^{-1}$; Squat: 0.60 ms$^{-1}$	6	1	28.3333	0.43	2	Squat	177	83.1	26	0	1	10
Low pre-set velocity loss	3	Bench press: 0.45 ms$^{-1}$; Squat: 0.60 ms$^{-1}$	7	1	20	0.48	1	Squat	177	83.1	26	0	1	10
Low pre-set velocity loss	3	Bench press: 0.45 ms$^{-1}$; Squat: 0.60 ms$^{-1}$	8	1	28.3333	0.43	2	Squat	177	83.1	26	0	1	10
Low pre-set velocity loss	3	Bench press: 0.38 ms$^{-1}$; Squat: 0.49 ms$^{-1}$	1	2	1.92308	0.51	1	Squat	177	83.1	26	0	1	10
Low pre-set velocity loss	3	Bench press: 0.38 ms$^{-1}$; Squat: 0.49 ms$^{-1}$	2	0	38.4615	0.32	2	Squat	177	83.1	26	0	1	10
Low pre-set velocity loss	3	Bench press: 0.38 ms$^{-1}$; Squat: 0.49 ms$^{-1}$	3	1	0	0.52	1	Squat	177	83.1	26	0	1	10
Low pre-set velocity loss	3	Bench press: 0.38 ms$^{-1}$; Squat: 0.49 ms$^{-1}$	4	0	34.6154	0.34	1	Squat	177	83.1	26	0	1	10
Low pre-set velocity loss	3	Bench press: 0.38 ms$^{-1}$; Squat: 0.49 ms$^{-1}$	5	1	19.2308	0.42	2	Squat	177	83.1	26	0	1	10
Low pre-set velocity loss	3	Bench press: 0.38 ms$^{-1}$; Squat: 0.49 ms$^{-1}$	6	0	25	0.39	1	Squat	177	83.1	26	0	1	10
Low pre-set velocity loss	3	Bench press: 0.38 ms$^{-1}$; Squat: 0.49 ms$^{-1}$	7	0	21.1538	0.41	1	Squat	177	83.1	26	0	1	10
Low pre-set velocity loss	3	Bench press: 0.38 ms$^{-1}$; Squat: 0.49 ms$^{-1}$	8	0	25	0.39	1	Squat	177	83.1	26	0	1	10
Low pre-set velocity loss	3	Bench press: 0.38 ms$^{-1}$; Squat: 0.49 ms$^{-1}$	9	0	32.6923	0.35	1	Squat	177	83.1	26	0	1	10
Low pre-set velocity loss	3	Bench press: 0.53 ms$^{-1}$; Squat: 0.70 ms$^{-1}$	1	2	21.9178	0.57	5	Squat	177	83.1	26	0	1	10
Low pre-set velocity loss	3	Bench press: 0.53 ms$^{-1}$; Squat: 0.70 ms$^{-1}$	2	1	34.2466	0.48	5	Squat	177	83.1	26	0	1	10
Low pre-set velocity loss	3	Bench press: 0.53 ms$^{-1}$; Squat: 0.70 ms$^{-1}$	3	2	17.8082	0.6	3	Squat	177	83.1	26	0	1	10
Low pre-set velocity loss	3	Bench press: 0.53 ms$^{-1}$; Squat: 0.70 ms$^{-1}$	4	1	16.4384	0.61	4	Squat	177	83.1	26	0	1	10
Low pre-set velocity loss	3	Bench press: 0.53 ms$^{-1}$; Squat: 0.70 ms$^{-1}$	5	1	21.9178	0.57	4	Squat	177	83.1	26	0	1	10
Low pre-set velocity loss	3	Bench press: 0.53 ms$^{-1}$; Squat: 0.70 ms$^{-1}$	6	2	17.8082	0.6	2	Squat	177	83.1	26	0	1	10
Low pre-set velocity loss	3	Bench press: 0.53 ms$^{-1}$; Squat: 0.70 ms$^{-1}$	7	1	27.3973	0.53	3	Squat	177	83.1	26	0	1	10
Low pre-set velocity loss	4	Bench press: 0.45 ms$^{-1}$; Squat: 0.60 ms$^{-1}$	1	1	28.3333	0.43	4	Squat	177	83.1	26	0	1	10
Low pre-set velocity loss	4	Bench press: 0.45 ms$^{-1}$; Squat: 0.60 ms$^{-1}$	2	1	23.3333	0.46	3	Squat	177	83.1	26	0	1	10
Low pre-set velocity loss	4	Bench press: 0.45 ms$^{-1}$; Squat: 0.60 ms$^{-1}$	3	1	26.6667	0.44	3	Squat	177	83.1	26	0	1	10
Low pre-set velocity loss	4	Bench press: 0.45 ms$^{-1}$; Squat: 0.60 ms$^{-1}$	4	1	20	0.48	2	Squat	177	83.1	26	0	1	10
Low pre-set velocity loss	4	Bench press: 0.45 ms$^{-1}$; Squat: 0.60 ms$^{-1}$	5	1	28.3333	0.43	2	Squat	177	83.1	26	0	1	10
Low pre-set velocity loss	4	Bench press: 0.45 ms$^{-1}$; Squat: 0.60 ms$^{-1}$	6	1	21.6667	0.47	1	Squat	177	83.1	26	0	1	10
Low pre-set velocity loss	4	Bench press: 0.45 ms$^{-1}$; Squat: 0.60 ms$^{-1}$	7	1	16.6667	0.5	1	Squat	177	83.1	26	0	1	10
Low pre-set velocity loss	4	Bench press: 0.45 ms$^{-1}$; Squat: 0.60 ms$^{-1}$	8	1	15	0.51	1	Squat	177	83.1	26	0	1	10
Low pre-set velocity loss	4	Bench press: 0.38 ms$^{-1}$; Squat: 0.49 ms$^{-1}$	1	1	7.84314	0.47	2	Squat	177	83.1	26	0	1	10
Low pre-set velocity loss	4	Bench press: 0.38 ms$^{-1}$; Squat: 0.49 ms$^{-1}$	2	0	19.6078	0.41	2	Squat	177	83.1	26	0	1	10
Low pre-set velocity loss	4	Bench press: 0.38 ms$^{-1}$; Squat: 0.49 ms$^{-1}$	3	1	17.6471	0.42	2	Squat	177	83.1	26	0	1	10
Low pre-set velocity loss	4	Bench press: 0.38 ms$^{-1}$; Squat: 0.49 ms$^{-1}$	4	1	13.7255	0.44	1	Squat	177	83.1	26	0	1	10
Low pre-set velocity loss	4	Bench press: 0.38 ms$^{-1}$; Squat: 0.49 ms$^{-1}$	5	1	17.6471	0.42	1	Squat	177	83.1	26	0	1	10
Low pre-set velocity loss	4	Bench press: 0.38 ms$^{-1}$; Squat: 0.49 ms$^{-1}$	6	1	21.5686	0.4	1	Squat	177	83.1	26	0	1	10
Low pre-set velocity loss	4	Bench press: 0.38 ms$^{-1}$; Squat: 0.49 ms$^{-1}$	7	0	21.5686	0.4	1	Squat	177	83.1	26	0	1	10
Low pre-set velocity loss	4	Bench press: 0.53 ms$^{-1}$; Squat: 0.70 ms$^{-1}$	1	2	28.169	0.51	5	Squat	177	83.1	26	0	1	10
Low pre-set velocity loss	4	Bench press: 0.53 ms$^{-1}$; Squat: 0.70 ms$^{-1}$	2	2	19.7183	0.57	4	Squat	177	83.1	26	0	1	10
Low pre-set velocity loss	4	Bench press: 0.53 ms$^{-1}$; Squat: 0.70 ms$^{-1}$	3	2	19.7183	0.57	3	Squat	177	83.1	26	0	1	10
Low pre-set velocity loss	4	Bench press: 0.53 ms$^{-1}$; Squat: 0.70 ms$^{-1}$	4	2	21.1268	0.56	3	Squat	177	83.1	26	0	1	10
Low pre-set velocity loss	4	Bench press: 0.53 ms$^{-1}$; Squat: 0.70 ms$^{-1}$	5	2	19.7183	0.57	2	Squat	177	83.1	26	0	1	10
Low pre-set velocity loss	4	Bench press: 0.53 ms$^{-1}$; Squat: 0.70 ms$^{-1}$	6	2	16.9014	0.59	2	Squat	177	83.1	26	0	1	10
Low pre-set velocity loss	4	Bench press: 0.53 ms$^{-1}$; Squat: 0.70 ms$^{-1}$	7	1	29.5775	0.5	3	Squat	177	83.1	26	0	1	10
Low pre-set velocity loss	4	Bench press: 0.53 ms$^{-1}$; Squat: 0.70 ms$^{-1}$	8	2	16.9014	0.59	1	Squat	177	83.1	26	0	1	10
Low pre-set velocity loss	4	Bench press: 0.53 ms$^{-1}$; Squat: 0.70 ms$^{-1}$	9	2	15.493	0.6	1	Squat	177	83.1	26	0	1	10
Low pre-set velocity loss	5	Bench press: 0.45 ms$^{-1}$; Squat: 0.60 ms$^{-1}$	1	1	28.8136	0.42	4	Squat	177	83.1	26	0	1	10
Low pre-set velocity loss	5	Bench press: 0.45 ms$^{-1}$; Squat: 0.60 ms$^{-1}$	2	1	23.7288	0.45	3	Squat	177	83.1	26	0	1	10
Low pre-set velocity loss	5	Bench press: 0.45 ms$^{-1}$; Squat: 0.60 ms$^{-1}$	3	1	11.8644	0.52	2	Squat	177	83.1	26	0	1	10
Low pre-set velocity loss	5	Bench press: 0.45 ms$^{-1}$; Squat: 0.60 ms$^{-1}$	4	2	13.5593	0.51	2	Squat	177	83.1	26	0	1	10
Low pre-set velocity loss	5	Bench press: 0.45 ms$^{-1}$; Squat: 0.60 ms$^{-1}$	5	0	22.0339	0.46	2	Squat	177	83.1	26	0	1	10
Low pre-set velocity loss	5	Bench press: 0.45 ms$^{-1}$; Squat: 0.60 ms$^{-1}$	6	0	33.8983	0.39	2	Squat	177	83.1	26	0	1	10
Low pre-set velocity loss	5	Bench press: 0.45 ms$^{-1}$; Squat: 0.60 ms$^{-1}$	7	1	22.0339	0.46	1	Squat	177	83.1	26	0	1	10
Low pre-set velocity loss	5	Bench press: 0.38 ms$^{-1}$; Squat: 0.49 ms$^{-1}$	1	1	16.3265	0.41	2	Squat	177	83.1	26	0	1	10
Low pre-set velocity loss	5	Bench press: 0.38 ms$^{-1}$; Squat: 0.49 ms$^{-1}$	2	0	20.4082	0.39	2	Squat	177	83.1	26	0	1	10
Low pre-set velocity loss	5	Bench press: 0.38 ms$^{-1}$; Squat: 0.49 ms$^{-1}$	3	0	30.6122	0.34	2	Squat	177	83.1	26	0	1	10
Low pre-set velocity loss	5	Bench press: 0.38 ms$^{-1}$; Squat: 0.49 ms$^{-1}$	4	0	30.6122	0.34	1	Squat	177	83.1	26	0	1	10
Low pre-set velocity loss	5	Bench press: 0.38 ms$^{-1}$; Squat: 0.49 ms$^{-1}$	5	0	14.2857	0.42	1	Squat	177	83.1	26	0	1	10
Low pre-set velocity loss	5	Bench press: 0.38 ms$^{-1}$; Squat: 0.49 ms$^{-1}$	6	0	10.2041	0.44	1	Squat	177	83.1	26	0	1	10
Low pre-set velocity loss	5	Bench press: 0.38 ms$^{-1}$; Squat: 0.49 ms$^{-1}$	7	0	14.2857	0.42	1	Squat	177	83.1	26	0	1	10
Low pre-set velocity loss	5	Bench press: 0.38 ms$^{-1}$; Squat: 0.49 ms$^{-1}$	8	0	32.6531	0.33	1	Squat	177	83.1	26	0	1	10
Low pre-set velocity loss	5	Bench press: 0.38 ms$^{-1}$; Squat: 0.49 ms$^{-1}$	9	0	26.5306	0.36	1	Squat	177	83.1	26	0	1	10
Low pre-set velocity loss	5	Bench press: 0.38 ms$^{-1}$; Squat: 0.49 ms$^{-1}$	10	0	18.3673	0.4	1	Squat	177	83.1	26	0	1	10
Low pre-set velocity loss	5	Bench press: 0.53 ms$^{-1}$; Squat: 0.70 ms$^{-1}$	1	1	31.8841	0.47	5	Squat	177	83.1	26	0	1	10
Low pre-set velocity loss	5	Bench press: 0.53 ms$^{-1}$; Squat: 0.70 ms$^{-1}$	2	2	14.4928	0.59	3	Squat	177	83.1	26	0	1	10
Low pre-set velocity loss	5	Bench press: 0.53 ms$^{-1}$; Squat: 0.70 ms$^{-1}$	3	2	17.3913	0.57	3	Squat	177	83.1	26	0	1	10
Low pre-set velocity loss	5	Bench press: 0.53 ms$^{-1}$; Squat: 0.70 ms$^{-1}$	4	2	20.2899	0.55	3	Squat	177	83.1	26	0	1	10
Low pre-set velocity loss	5	Bench press: 0.53 ms$^{-1}$; Squat: 0.70 ms$^{-1}$	5	2	28.9855	0.49	3	Squat	177	83.1	26	0	1	10
Low pre-set velocity loss	5	Bench press: 0.53 ms$^{-1}$; Squat: 0.70 ms$^{-1}$	6	2	17.3913	0.57	2	Squat	177	83.1	26	0	1	10
Low pre-set velocity loss	5	Bench press: 0.53 ms$^{-1}$; Squat: 0.70 ms$^{-1}$	7	2	21.7391	0.54	3	Squat	177	83.1	26	0	1	10
Low pre-set velocity loss	5	Bench press: 0.53 ms$^{-1}$; Squat: 0.70 ms$^{-1}$	8	2	18.8406	0.56	2	Squat	177	83.1	26	0	1	10
Low pre-set velocity loss	5	Bench press: 0.53 ms$^{-1}$; Squat: 0.70 ms$^{-1}$	9	2	15.942	0.58	2	Squat	177	83.1	26	0	1	10
Low pre-set velocity loss	5	Bench press: 0.53 ms$^{-1}$; Squat: 0.70 ms$^{-1}$	10	2	17.3913	0.57	2	Squat	177	83.1	26	0	1	10
Low pre-set velocity loss	6	Bench press: 0.45 ms$^{-1}$; Squat: 0.60 ms$^{-1}$	1	2	15	0.51	3	Squat	177	83.1	26	0	1	10
Low pre-set velocity loss	6	Bench press: 0.45 ms$^{-1}$; Squat: 0.60 ms$^{-1}$	2	1	30	0.42	3	Squat	177	83.1	26	0	1	10
Low pre-set velocity loss	6	Bench press: 0.45 ms$^{-1}$; Squat: 0.60 ms$^{-1}$	3	2	20	0.48	2	Squat	177	83.1	26	0	1	10
Low pre-set velocity loss	6	Bench press: 0.45 ms$^{-1}$; Squat: 0.60 ms$^{-1}$	4	2	18.3333	0.49	2	Squat	177	83.1	26	0	1	10
Low pre-set velocity loss	6	Bench press: 0.45 ms$^{-1}$; Squat: 0.60 ms$^{-1}$	5	1	23.3333	0.46	2	Squat	177	83.1	26	0	1	10
Low pre-set velocity loss	6	Bench press: 0.45 ms$^{-1}$; Squat: 0.60 ms$^{-1}$	6	1	23.3333	0.46	2	Squat	177	83.1	26	0	1	10
Low pre-set velocity loss	6	Bench press: 0.45 ms$^{-1}$; Squat: 0.60 ms$^{-1}$	7	2	23.3333	0.46	1	Squat	177	83.1	26	0	1	10
Low pre-set velocity loss	6	Bench press: 0.45 ms$^{-1}$; Squat: 0.60 ms$^{-1}$	8	2	18.3333	0.49	1	Squat	177	83.1	26	0	1	10
Low pre-set velocity loss	6	Bench press: 0.45 ms$^{-1}$; Squat: 0.60 ms$^{-1}$	9	1	20	0.48	1	Squat	177	83.1	26	0	1	10
Low pre-set velocity loss	6	Bench press: 0.45 ms$^{-1}$; Squat: 0.60 ms$^{-1}$	10	0	25	0.45	1	Squat	177	83.1	26	0	1	10
Low pre-set velocity loss	6	Bench press: 0.38 ms$^{-1}$; Squat: 0.49 ms$^{-1}$	1	0	28	0.36	4	Squat	177	83.1	26	0	1	10
Low pre-set velocity loss	6	Bench press: 0.38 ms$^{-1}$; Squat: 0.49 ms$^{-1}$	2	1	22	0.39	2	Squat	177	83.1	26	0	1	10
Low pre-set velocity loss	6	Bench press: 0.38 ms$^{-1}$; Squat: 0.49 ms$^{-1}$	3	1	10	0.45	1	Squat	177	83.1	26	0	1	10
Low pre-set velocity loss	6	Bench press: 0.38 ms$^{-1}$; Squat: 0.49 ms$^{-1}$	4	0	22	0.39	2	Squat	177	83.1	26	0	1	10
Low pre-set velocity loss	6	Bench press: 0.38 ms$^{-1}$; Squat: 0.49 ms$^{-1}$	5	1	14	0.43	1	Squat	177	83.1	26	0	1	10
Low pre-set velocity loss	6	Bench press: 0.38 ms$^{-1}$; Squat: 0.49 ms$^{-1}$	6	0	32	0.34	2	Squat	177	83.1	26	0	1	10
Low pre-set velocity loss	6	Bench press: 0.38 ms$^{-1}$; Squat: 0.49 ms$^{-1}$	7	0	32	0.34	1	Squat	177	83.1	26	0	1	10
Low pre-set velocity loss	6	Bench press: 0.38 ms$^{-1}$; Squat: 0.49 ms$^{-1}$	8	1	14	0.43	1	Squat	177	83.1	26	0	1	10
Low pre-set velocity loss	6	Bench press: 0.53 ms$^{-1}$; Squat: 0.70 ms$^{-1}$	1	4	11.4286	0.62	3	Squat	177	83.1	26	0	1	10
Low pre-set velocity loss	6	Bench press: 0.53 ms$^{-1}$; Squat: 0.70 ms$^{-1}$	2	2	21.4286	0.55	5	Squat	177	83.1	26	0	1	10
Low pre-set velocity loss	6	Bench press: 0.53 ms$^{-1}$; Squat: 0.70 ms$^{-1}$	3	2	18.5714	0.57	4	Squat	177	83.1	26	0	1	10
Low pre-set velocity loss	6	Bench press: 0.53 ms$^{-1}$; Squat: 0.70 ms$^{-1}$	4	2	17.1429	0.58	5	Squat	177	83.1	26	0	1	10
Low pre-set velocity loss	6	Bench press: 0.53 ms$^{-1}$; Squat: 0.70 ms$^{-1}$	5	2	24.2857	0.53	5	Squat	177	83.1	26	0	1	10
Low pre-set velocity loss	6	Bench press: 0.53 ms$^{-1}$; Squat: 0.70 ms$^{-1}$	6	2	38.5714	0.43	4	Squat	177	83.1	26	0	1	10
High pre-set velocity loss	1	Bench press: 0.45 ms$^{-1}$; Squat: 0.60 ms$^{-1}$	1	0	33.871	0.41	4	Squat	177	83.1	26	0	2	10
High pre-set velocity loss	1	Bench press: 0.45 ms$^{-1}$; Squat: 0.60 ms$^{-1}$	2	0	37.0968	0.39	3	Squat	177	83.1	26	0	2	10
High pre-set velocity loss	1	Bench press: 0.38 ms$^{-1}$; Squat: 0.49 ms$^{-1}$	1	0	56.25	0.21	3	Squat	177	83.1	26	0	2	10
High pre-set velocity loss	1	Bench press: 0.38 ms$^{-1}$; Squat: 0.49 ms$^{-1}$	2	0	45.8333	0.26	2	Squat	177	83.1	26	0	2	10
High pre-set velocity loss	1	Bench press: 0.53 ms$^{-1}$; Squat: 0.70 ms$^{-1}$	1	1	40.2778	0.43	7	Squat	177	83.1	26	0	2	10
High pre-set velocity loss	1	Bench press: 0.53 ms$^{-1}$; Squat: 0.70 ms$^{-1}$	2	0	51.3889	0.35	7	Squat	177	83.1	26	0	2	10
High pre-set velocity loss	2	Bench press: 0.45 ms$^{-1}$; Squat: 0.60 ms$^{-1}$	1	0	37.2881	0.37	4	Squat	177	83.1	26	0	2	10
High pre-set velocity loss	2	Bench press: 0.45 ms$^{-1}$; Squat: 0.60 ms$^{-1}$	2	0	45.7627	0.32	3	Squat	177	83.1	26	0	2	10
High pre-set velocity loss	2	Bench press: 0.45 ms$^{-1}$; Squat: 0.60 ms$^{-1}$	3	0	28.8136	0.42	3	Squat	177	83.1	26	0	2	10
High pre-set velocity loss	2	Bench press: 0.38 ms$^{-1}$; Squat: 0.49 ms$^{-1}$	1	0	31.25	0.33	2	Squat	177	83.1	26	0	2	10
High pre-set velocity loss	2	Bench press: 0.38 ms$^{-1}$; Squat: 0.49 ms$^{-1}$	2	0	33.3333	0.32	2	Squat	177	83.1	26	0	2	10
High pre-set velocity loss	2	Bench press: 0.38 ms$^{-1}$; Squat: 0.49 ms$^{-1}$	3	0	56.25	0.21	1	Squat	177	83.1	26	0	2	10
High pre-set velocity loss	2	Bench press: 0.53 ms$^{-1}$; Squat: 0.70 ms$^{-1}$	1	1	41.1765	0.4	7	Squat	177	83.1	26	0	2	10
High pre-set velocity loss	2	Bench press: 0.53 ms$^{-1}$; Squat: 0.70 ms$^{-1}$	2	1	33.8235	0.45	6	Squat	177	83.1	26	0	2	10
High pre-set velocity loss	2	Bench press: 0.53 ms$^{-1}$; Squat: 0.70 ms$^{-1}$	3	1	38.2353	0.42	5	Squat	177	83.1	26	0	2	10
High pre-set velocity loss	3	Bench press: 0.45 ms$^{-1}$; Squat: 0.60 ms$^{-1}$	1	1	31.5789	0.39	5	Squat	177	83.1	26	0	2	10
High pre-set velocity loss	3	Bench press: 0.45 ms$^{-1}$; Squat: 0.60 ms$^{-1}$	2	1	33.3333	0.38	4	Squat	177	83.1	26	0	2	10
High pre-set velocity loss	3	Bench press: 0.45 ms$^{-1}$; Squat: 0.60 ms$^{-1}$	3	0	38.5965	0.35	4	Squat	177	83.1	26	0	2	10
High pre-set velocity loss	3	Bench press: 0.38 ms$^{-1}$; Squat: 0.49 ms$^{-1}$	1	0	39.6226	0.32	3	Squat	177	83.1	26	0	2	10
High pre-set velocity loss	3	Bench press: 0.38 ms$^{-1}$; Squat: 0.49 ms$^{-1}$	2	1	33.9623	0.35	3	Squat	177	83.1	26	0	2	10
High pre-set velocity loss	3	Bench press: 0.38 ms$^{-1}$; Squat: 0.49 ms$^{-1}$	3	0	28.3019	0.38	2	Squat	177	83.1	26	0	2	10
High pre-set velocity loss	3	Bench press: 0.53 ms$^{-1}$; Squat: 0.70 ms$^{-1}$	1	0	49.2958	0.36	10	Squat	177	83.1	26	0	2	10
High pre-set velocity loss	3	Bench press: 0.53 ms$^{-1}$; Squat: 0.70 ms$^{-1}$	2	1	47.8873	0.37	7	Squat	177	83.1	26	0	2	10
High pre-set velocity loss	3	Bench press: 0.53 ms$^{-1}$; Squat: 0.70 ms$^{-1}$	3	0	54.9296	0.32	5	Squat	177	83.1	26	0	2	10
High pre-set velocity loss	4	Bench press: 0.45 ms$^{-1}$; Squat: 0.60 ms$^{-1}$	1	1	27.1186	0.43	5	Squat	177	83.1	26	0	2	10
High pre-set velocity loss	4	Bench press: 0.45 ms$^{-1}$; Squat: 0.60 ms$^{-1}$	2	0	47.4576	0.31	4	Squat	177	83.1	26	0	2	10
High pre-set velocity loss	4	Bench press: 0.45 ms$^{-1}$; Squat: 0.60 ms$^{-1}$	3	0	45.7627	0.32	4	Squat	177	83.1	26	0	2	10
High pre-set velocity loss	4	Bench press: 0.38 ms$^{-1}$; Squat: 0.49 ms$^{-1}$	1	0	22.9167	0.37	2	Squat	177	83.1	26	0	2	10
High pre-set velocity loss	4	Bench press: 0.38 ms$^{-1}$; Squat: 0.49 ms$^{-1}$	2	0	35.4167	0.31	2	Squat	177	83.1	26	0	2	10
High pre-set velocity loss	4	Bench press: 0.38 ms$^{-1}$; Squat: 0.49 ms$^{-1}$	3	0	56.25	0.21	2	Squat	177	83.1	26	0	2	10
High pre-set velocity loss	4	Bench press: 0.53 ms$^{-1}$; Squat: 0.70 ms$^{-1}$	1	1	41.6667	0.42	10	Squat	177	83.1	26	0	2	10
High pre-set velocity loss	4	Bench press: 0.53 ms$^{-1}$; Squat: 0.70 ms$^{-1}$	2	2	43.0556	0.41	7	Squat	177	83.1	26	0	2	10
High pre-set velocity loss	4	Bench press: 0.53 ms$^{-1}$; Squat: 0.70 ms$^{-1}$	3	1	50	0.36	7	Squat	177	83.1	26	0	2	10
High pre-set velocity loss	5	Bench press: 0.45 ms$^{-1}$; Squat: 0.60 ms$^{-1}$	1	3	12.9032	0.54	3	Squat	177	83.1	26	0	2	10
High pre-set velocity loss	5	Bench press: 0.45 ms$^{-1}$; Squat: 0.60 ms$^{-1}$	2	0	54.8387	0.28	6	Squat	177	83.1	26	0	2	10
High pre-set velocity loss	5	Bench press: 0.45 ms$^{-1}$; Squat: 0.60 ms$^{-1}$	3	0	41.9355	0.36	4	Squat	177	83.1	26	0	2	10
High pre-set velocity loss	5	Bench press: 0.45 ms$^{-1}$; Squat: 0.60 ms$^{-1}$	4	0	48.3871	0.32	5	Squat	177	83.1	26	0	2	10
High pre-set velocity loss	5	Bench press: 0.38 ms$^{-1}$; Squat: 0.49 ms$^{-1}$	1	0	38	0.31	3	Squat	177	83.1	26	0	2	10
High pre-set velocity loss	5	Bench press: 0.38 ms$^{-1}$; Squat: 0.49 ms$^{-1}$	2	1	20	0.4	2	Squat	177	83.1	26	0	2	10
High pre-set velocity loss	5	Bench press: 0.38 ms$^{-1}$; Squat: 0.49 ms$^{-1}$	3	0	30	0.35	3	Squat	177	83.1	26	0	2	10
High pre-set velocity loss	5	Bench press: 0.38 ms$^{-1}$; Squat: 0.49 ms$^{-1}$	4	0	40	0.3	2	Squat	177	83.1	26	0	2	10
High pre-set velocity loss	5	Bench press: 0.53 ms$^{-1}$; Squat: 0.70 ms$^{-1}$	1	1	47.8261	0.36	7	Squat	177	83.1	26	0	2	10
High pre-set velocity loss	5	Bench press: 0.53 ms$^{-1}$; Squat: 0.70 ms$^{-1}$	2	1	36.2319	0.44	5	Squat	177	83.1	26	0	2	10
High pre-set velocity loss	5	Bench press: 0.53 ms$^{-1}$; Squat: 0.70 ms$^{-1}$	3	2	33.3333	0.46	5	Squat	177	83.1	26	0	2	10
High pre-set velocity loss	5	Bench press: 0.53 ms$^{-1}$; Squat: 0.70 ms$^{-1}$	4	0	55.0725	0.31	5	Squat	177	83.1	26	0	2	10
High pre-set velocity loss	6	Bench press: 0.45 ms$^{-1}$; Squat: 0.60 ms$^{-1}$	1	1	29.3103	0.41	4	Squat	177	83.1	26	0	2	10
High pre-set velocity loss	6	Bench press: 0.45 ms$^{-1}$; Squat: 0.60 ms$^{-1}$	2	1	34.4828	0.38	3	Squat	177	83.1	26	0	2	10
High pre-set velocity loss	6	Bench press: 0.45 ms$^{-1}$; Squat: 0.60 ms$^{-1}$	3	0	36.2069	0.37	3	Squat	177	83.1	26	0	2	10
High pre-set velocity loss	6	Bench press: 0.45 ms$^{-1}$; Squat: 0.60 ms$^{-1}$	4	0	39.6552	0.35	3	Squat	177	83.1	26	0	2	10
High pre-set velocity loss	6	Bench press: 0.38 ms$^{-1}$; Squat: 0.49 ms$^{-1}$	1	0	28.5714	0.35	3	Squat	177	83.1	26	0	2	10
High pre-set velocity loss	6	Bench press: 0.38 ms$^{-1}$; Squat: 0.49 ms$^{-1}$	2	0	36.7347	0.31	2	Squat	177	83.1	26	0	2	10
High pre-set velocity loss	6	Bench press: 0.38 ms$^{-1}$; Squat: 0.49 ms$^{-1}$	3	0	40.8163	0.29	2	Squat	177	83.1	26	0	2	10
High pre-set velocity loss	6	Bench press: 0.38 ms$^{-1}$; Squat: 0.49 ms$^{-1}$	4	0	32.6531	0.33	1	Squat	177	83.1	26	0	2	10
High pre-set velocity loss	6	Bench press: 0.53 ms$^{-1}$; Squat: 0.70 ms$^{-1}$	1	2	20.5882	0.54	5	Squat	177	83.1	26	0	2	10
High pre-set velocity loss	6	Bench press: 0.53 ms$^{-1}$; Squat: 0.70 ms$^{-1}$	2	2	23.5294	0.52	4	Squat	177	83.1	26	0	2	10
High pre-set velocity loss	6	Bench press: 0.53 ms$^{-1}$; Squat: 0.70 ms$^{-1}$	3	1	50	0.34	5	Squat	177	83.1	26	0	2	10
High pre-set velocity loss	6	Bench press: 0.53 ms$^{-1}$; Squat: 0.70 ms$^{-1}$	4	0	58.8235	0.28	5	Squat	177	83.1	26	0	2	10
Low pre-set velocity loss	1	Bench press: 0.45 ms$^{-1}$; Squat: 0.60 ms$^{-1}$	1	3	20.4545	0.35	5	Bench press	179.5	77.7	32	0	1	11
Low pre-set velocity loss	1	Bench press: 0.45 ms$^{-1}$; Squat: 0.60 ms$^{-1}$	2	3	29.5455	0.31	5	Bench press	179.5	77.7	32	0	1	11
Low pre-set velocity loss	1	Bench press: 0.38 ms$^{-1}$; Squat: 0.49 ms$^{-1}$	1	2	30.7692	0.27	4	Bench press	179.5	77.7	32	0	1	11
Low pre-set velocity loss	1	Bench press: 0.38 ms$^{-1}$; Squat: 0.49 ms$^{-1}$	2	2	28.2051	0.28	4	Bench press	179.5	77.7	32	0	1	11
Low pre-set velocity loss	1	Bench press: 0.38 ms$^{-1}$; Squat: 0.49 ms$^{-1}$	3	2	33.3333	0.26	4	Bench press	179.5	77.7	32	0	1	11
Low pre-set velocity loss	1	Bench press: 0.53 ms$^{-1}$; Squat: 0.70 ms$^{-1}$	1	4	42.3077	0.3	7	Bench press	179.5	77.7	32	0	1	11
Low pre-set velocity loss	1	Bench press: 0.53 ms$^{-1}$; Squat: 0.70 ms$^{-1}$	2	3	21.1538	0.41	5	Bench press	179.5	77.7	32	0	1	11
Low pre-set velocity loss	1	Bench press: 0.53 ms$^{-1}$; Squat: 0.70 ms$^{-1}$	3	4	30.7692	0.36	7	Bench press	179.5	77.7	32	0	1	11
Low pre-set velocity loss	2	Bench press: 0.45 ms$^{-1}$; Squat: 0.60 ms$^{-1}$	1	4	36.1702	0.3	6	Bench press	179.5	77.7	32	0	1	11
Low pre-set velocity loss	2	Bench press: 0.45 ms$^{-1}$; Squat: 0.60 ms$^{-1}$	3	4	25.5319	0.35	5	Bench press	179.5	77.7	32	0	1	11
Low pre-set velocity loss	2	Bench press: 0.45 ms$^{-1}$; Squat: 0.60 ms$^{-1}$	4	3	21.2766	0.37	4	Bench press	179.5	77.7	32	0	1	11
Low pre-set velocity loss	2	Bench press: 0.38 ms$^{-1}$; Squat: 0.49 ms$^{-1}$	1	4	13.5135	0.32	4	Bench press	179.5	77.7	32	0	1	11
Low pre-set velocity loss	2	Bench press: 0.38 ms$^{-1}$; Squat: 0.49 ms$^{-1}$	2	4	51.3514	0.18	4	Bench press	179.5	77.7	32	0	1	11
Low pre-set velocity loss	2	Bench press: 0.38 ms$^{-1}$; Squat: 0.49 ms$^{-1}$	3	3	27.027	0.27	3	Bench press	179.5	77.7	32	0	1	11
Low pre-set velocity loss	2	Bench press: 0.38 ms$^{-1}$; Squat: 0.49 ms$^{-1}$	4	4	8.10811	0.34	2	Bench press	179.5	77.7	32	0	1	11
Low pre-set velocity loss	2	Bench press: 0.53 ms$^{-1}$; Squat: 0.70 ms$^{-1}$	2	4	42.5926	0.31	5	Bench press	179.5	77.7	32	0	1	11
Low pre-set velocity loss	2	Bench press: 0.53 ms$^{-1}$; Squat: 0.70 ms$^{-1}$	3	4	24.0741	0.41	4	Bench press	179.5	77.7	32	0	1	11
Low pre-set velocity loss	2	Bench press: 0.53 ms$^{-1}$; Squat: 0.70 ms$^{-1}$	4	3	31.4815	0.37	4	Bench press	179.5	77.7	32	0	1	11
Low pre-set velocity loss	2	Bench press: 0.53 ms$^{-1}$; Squat: 0.70 ms$^{-1}$	5	3	29.6296	0.38	4	Bench press	179.5	77.7	32	0	1	11
Low pre-set velocity loss	2	Bench press: 0.53 ms$^{-1}$; Squat: 0.70 ms$^{-1}$	6	3	29.6296	0.38	3	Bench press	179.5	77.7	32	0	1	11
Low pre-set velocity loss	3	Bench press: 0.45 ms$^{-1}$; Squat: 0.60 ms$^{-1}$	1	4	29.7872	0.33	6	Bench press	179.5	77.7	32	0	1	11
Low pre-set velocity loss	3	Bench press: 0.45 ms$^{-1}$; Squat: 0.60 ms$^{-1}$	2	3	44.6809	0.26	5	Bench press	179.5	77.7	32	0	1	11
Low pre-set velocity loss	3	Bench press: 0.45 ms$^{-1}$; Squat: 0.60 ms$^{-1}$	3	3	29.7872	0.33	5	Bench press	179.5	77.7	32	0	1	11
Low pre-set velocity loss	3	Bench press: 0.45 ms$^{-1}$; Squat: 0.60 ms$^{-1}$	4	4	29.7872	0.33	4	Bench press	179.5	77.7	32	0	1	11
Low pre-set velocity loss	3	Bench press: 0.38 ms$^{-1}$; Squat: 0.49 ms$^{-1}$	1	3	28.9474	0.27	5	Bench press	179.5	77.7	32	0	1	11
Low pre-set velocity loss	3	Bench press: 0.38 ms$^{-1}$; Squat: 0.49 ms$^{-1}$	2	3	47.3684	0.2	5	Bench press	179.5	77.7	32	0	1	11
Low pre-set velocity loss	3	Bench press: 0.38 ms$^{-1}$; Squat: 0.49 ms$^{-1}$	3	2	5.26316	0.36	2	Bench press	179.5	77.7	32	0	1	11
Low pre-set velocity loss	3	Bench press: 0.53 ms$^{-1}$; Squat: 0.70 ms$^{-1}$	2	4	33.3333	0.34	5	Bench press	179.5	77.7	32	0	1	11
Low pre-set velocity loss	3	Bench press: 0.53 ms$^{-1}$; Squat: 0.70 ms$^{-1}$	3	4	25.4902	0.38	5	Bench press	179.5	77.7	32	0	1	11
Low pre-set velocity loss	3	Bench press: 0.53 ms$^{-1}$; Squat: 0.70 ms$^{-1}$	4	3	31.3725	0.35	6	Bench press	179.5	77.7	32	0	1	11
Low pre-set velocity loss	3	Bench press: 0.53 ms$^{-1}$; Squat: 0.70 ms$^{-1}$	5	3	27.451	0.37	4	Bench press	179.5	77.7	32	0	1	11
Low pre-set velocity loss	4	Bench press: 0.45 ms$^{-1}$; Squat: 0.60 ms$^{-1}$	1	3	42.5532	0.27	5	Bench press	179.5	77.7	32	0	1	11
Low pre-set velocity loss	4	Bench press: 0.45 ms$^{-1}$; Squat: 0.60 ms$^{-1}$	2	3	38.2979	0.29	6	Bench press	179.5	77.7	32	0	1	11
Low pre-set velocity loss	4	Bench press: 0.45 ms$^{-1}$; Squat: 0.60 ms$^{-1}$	3	4	29.7872	0.33	4	Bench press	179.5	77.7	32	0	1	11
Low pre-set velocity loss	4	Bench press: 0.38 ms$^{-1}$; Squat: 0.49 ms$^{-1}$	1	3	25	0.33	4	Bench press	179.5	77.7	32	0	1	11
Low pre-set velocity loss	4	Bench press: 0.38 ms$^{-1}$; Squat: 0.49 ms$^{-1}$	2	3	38.6364	0.27	3	Bench press	179.5	77.7	32	0	1	11
Low pre-set velocity loss	4	Bench press: 0.38 ms$^{-1}$; Squat: 0.49 ms$^{-1}$	3	3	27.2727	0.32	4	Bench press	179.5	77.7	32	0	1	11
Low pre-set velocity loss	4	Bench press: 0.53 ms$^{-1}$; Squat: 0.70 ms$^{-1}$	2	4	41.0714	0.33	5	Bench press	179.5	77.7	32	0	1	11
Low pre-set velocity loss	4	Bench press: 0.53 ms$^{-1}$; Squat: 0.70 ms$^{-1}$	4	4	23.2143	0.43	4	Bench press	179.5	77.7	32	0	1	11
Low pre-set velocity loss	4	Bench press: 0.53 ms$^{-1}$; Squat: 0.70 ms$^{-1}$	5	3	33.9286	0.37	4	Bench press	179.5	77.7	32	0	1	11
Low pre-set velocity loss	5	Bench press: 0.45 ms$^{-1}$; Squat: 0.60 ms$^{-1}$	1	3	37.5	0.3	5	Bench press	179.5	77.7	32	0	1	11
Low pre-set velocity loss	5	Bench press: 0.45 ms$^{-1}$; Squat: 0.60 ms$^{-1}$	2	4	25	0.36	4	Bench press	179.5	77.7	32	0	1	11
Low pre-set velocity loss	5	Bench press: 0.45 ms$^{-1}$; Squat: 0.60 ms$^{-1}$	3	3	33.3333	0.32	4	Bench press	179.5	77.7	32	0	1	11
Low pre-set velocity loss	5	Bench press: 0.45 ms$^{-1}$; Squat: 0.60 ms$^{-1}$	4	3	31.25	0.33	4	Bench press	179.5	77.7	32	0	1	11
Low pre-set velocity loss	5	Bench press: 0.45 ms$^{-1}$; Squat: 0.60 ms$^{-1}$	5	2	41.6667	0.28	3	Bench press	179.5	77.7	32	0	1	11
Low pre-set velocity loss	5	Bench press: 0.45 ms$^{-1}$; Squat: 0.60 ms$^{-1}$	6	3	25	0.36	3	Bench press	179.5	77.7	32	0	1	11
Low pre-set velocity loss	5	Bench press: 0.38 ms$^{-1}$; Squat: 0.49 ms$^{-1}$	1	2	24.3902	0.31	4	Bench press	179.5	77.7	32	0	1	11
Low pre-set velocity loss	5	Bench press: 0.38 ms$^{-1}$; Squat: 0.49 ms$^{-1}$	2	2	39.0244	0.25	4	Bench press	179.5	77.7	32	0	1	11
Low pre-set velocity loss	5	Bench press: 0.38 ms$^{-1}$; Squat: 0.49 ms$^{-1}$	3	1	53.6585	0.19	4	Bench press	179.5	77.7	32	0	1	11
Low pre-set velocity loss	5	Bench press: 0.38 ms$^{-1}$; Squat: 0.49 ms$^{-1}$	4	2	26.8293	0.3	3	Bench press	179.5	77.7	32	0	1	11
Low pre-set velocity loss	5	Bench press: 0.38 ms$^{-1}$; Squat: 0.49 ms$^{-1}$	5	2	7.31707	0.38	2	Bench press	179.5	77.7	32	0	1	11
Low pre-set velocity loss	5	Bench press: 0.53 ms$^{-1}$; Squat: 0.70 ms$^{-1}$	1	2	32.7273	0.37	5	Bench press	179.5	77.7	32	0	1	11
Low pre-set velocity loss	5	Bench press: 0.53 ms$^{-1}$; Squat: 0.70 ms$^{-1}$	2	3	32.7273	0.37	4	Bench press	179.5	77.7	32	0	1	11
Low pre-set velocity loss	5	Bench press: 0.53 ms$^{-1}$; Squat: 0.70 ms$^{-1}$	3	2	30.9091	0.38	4	Bench press	179.5	77.7	32	0	1	11
Low pre-set velocity loss	5	Bench press: 0.53 ms$^{-1}$; Squat: 0.70 ms$^{-1}$	4	1	56.3636	0.24	4	Bench press	179.5	77.7	32	0	1	11
Low pre-set velocity loss	5	Bench press: 0.53 ms$^{-1}$; Squat: 0.70 ms$^{-1}$	5	2	32.7273	0.37	3	Bench press	179.5	77.7	32	0	1	11
Low pre-set velocity loss	5	Bench press: 0.53 ms$^{-1}$; Squat: 0.70 ms$^{-1}$	6	2	20	0.44	2	Bench press	179.5	77.7	32	0	1	11
Low pre-set velocity loss	5	Bench press: 0.53 ms$^{-1}$; Squat: 0.70 ms$^{-1}$	7	3	36.3636	0.35	2	Bench press	179.5	77.7	32	0	1	11
Low pre-set velocity loss	5	Bench press: 0.53 ms$^{-1}$; Squat: 0.70 ms$^{-1}$	8	2	21.8182	0.43	2	Bench press	179.5	77.7	32	0	1	11
Low pre-set velocity loss	6	Bench press: 0.45 ms$^{-1}$; Squat: 0.60 ms$^{-1}$	1	2	29.1667	0.34	3	Bench press	179.5	77.7	32	0	1	11
Low pre-set velocity loss	6	Bench press: 0.45 ms$^{-1}$; Squat: 0.60 ms$^{-1}$	2	4	29.1667	0.34	4	Bench press	179.5	77.7	32	0	1	11
Low pre-set velocity loss	6	Bench press: 0.45 ms$^{-1}$; Squat: 0.60 ms$^{-1}$	3	2	45.8333	0.26	3	Bench press	179.5	77.7	32	0	1	11
Low pre-set velocity loss	6	Bench press: 0.45 ms$^{-1}$; Squat: 0.60 ms$^{-1}$	4	2	25	0.36	3	Bench press	179.5	77.7	32	0	1	11
Low pre-set velocity loss	6	Bench press: 0.45 ms$^{-1}$; Squat: 0.60 ms$^{-1}$	5	1	33.3333	0.32	4	Bench press	179.5	77.7	32	0	1	11
Low pre-set velocity loss	6	Bench press: 0.45 ms$^{-1}$; Squat: 0.60 ms$^{-1}$	6	1	45.8333	0.26	3	Bench press	179.5	77.7	32	0	1	11
Low pre-set velocity loss	6	Bench press: 0.45 ms$^{-1}$; Squat: 0.60 ms$^{-1}$	7	2	25	0.36	2	Bench press	179.5	77.7	32	0	1	11
Low pre-set velocity loss	6	Bench press: 0.38 ms$^{-1}$; Squat: 0.49 ms$^{-1}$	1	1	47.5	0.21	3	Bench press	179.5	77.7	32	0	1	11
Low pre-set velocity loss	6	Bench press: 0.38 ms$^{-1}$; Squat: 0.49 ms$^{-1}$	2	1	15	0.34	1	Bench press	179.5	77.7	32	0	1	11
Low pre-set velocity loss	6	Bench press: 0.38 ms$^{-1}$; Squat: 0.49 ms$^{-1}$	3	2	20	0.32	1	Bench press	179.5	77.7	32	0	1	11
Low pre-set velocity loss	6	Bench press: 0.38 ms$^{-1}$; Squat: 0.49 ms$^{-1}$	4	1	40	0.24	1	Bench press	179.5	77.7	32	0	1	11
Low pre-set velocity loss	6	Bench press: 0.38 ms$^{-1}$; Squat: 0.49 ms$^{-1}$	5	2	7.5	0.37	1	Bench press	179.5	77.7	32	0	1	11
Low pre-set velocity loss	6	Bench press: 0.38 ms$^{-1}$; Squat: 0.49 ms$^{-1}$	6	1	57.5	0.17	2	Bench press	179.5	77.7	32	0	1	11
Low pre-set velocity loss	6	Bench press: 0.38 ms$^{-1}$; Squat: 0.49 ms$^{-1}$	7	1	12.5	0.35	1	Bench press	179.5	77.7	32	0	1	11
Low pre-set velocity loss	6	Bench press: 0.38 ms$^{-1}$; Squat: 0.49 ms$^{-1}$	8	1	27.5	0.29	1	Bench press	179.5	77.7	32	0	1	11
Low pre-set velocity loss	6	Bench press: 0.38 ms$^{-1}$; Squat: 0.49 ms$^{-1}$	9	1	40	0.24	1	Bench press	179.5	77.7	32	0	1	11
Low pre-set velocity loss	6	Bench press: 0.38 ms$^{-1}$; Squat: 0.49 ms$^{-1}$	10	1	47.5	0.21	1	Bench press	179.5	77.7	32	0	1	11
Low pre-set velocity loss	6	Bench press: 0.53 ms$^{-1}$; Squat: 0.70 ms$^{-1}$	1	2	52.9412	0.24	5	Bench press	179.5	77.7	32	0	1	11
Low pre-set velocity loss	6	Bench press: 0.53 ms$^{-1}$; Squat: 0.70 ms$^{-1}$	2	2	11.7647	0.45	3	Bench press	179.5	77.7	32	0	1	11
Low pre-set velocity loss	6	Bench press: 0.53 ms$^{-1}$; Squat: 0.70 ms$^{-1}$	3	3	11.7647	0.45	3	Bench press	179.5	77.7	32	0	1	11
Low pre-set velocity loss	6	Bench press: 0.53 ms$^{-1}$; Squat: 0.70 ms$^{-1}$	4	3	33.3333	0.34	4	Bench press	179.5	77.7	32	0	1	11
Low pre-set velocity loss	6	Bench press: 0.53 ms$^{-1}$; Squat: 0.70 ms$^{-1}$	5	2	35.2941	0.33	4	Bench press	179.5	77.7	32	0	1	11
Low pre-set velocity loss	6	Bench press: 0.53 ms$^{-1}$; Squat: 0.70 ms$^{-1}$	6	3	15.6863	0.43	3	Bench press	179.5	77.7	32	0	1	11
Low pre-set velocity loss	6	Bench press: 0.53 ms$^{-1}$; Squat: 0.70 ms$^{-1}$	7	2	19.6078	0.41	3	Bench press	179.5	77.7	32	0	1	11
High pre-set velocity loss	1	Bench press: 0.45 ms$^{-1}$; Squat: 0.60 ms$^{-1}$	1	0	61.7021	0.18	7	Bench press	181.1	71.6	28	0	1	12
High pre-set velocity loss	1	Bench press: 0.45 ms$^{-1}$; Squat: 0.60 ms$^{-1}$	2	1	57.4468	0.2	5	Bench press	181.1	71.6	28	0	1	12
High pre-set velocity loss	1	Bench press: 0.38 ms$^{-1}$; Squat: 0.49 ms$^{-1}$	1	2	47.3684	0.2	3	Bench press	181.1	71.6	28	0	1	12
High pre-set velocity loss	1	Bench press: 0.38 ms$^{-1}$; Squat: 0.49 ms$^{-1}$	2	0	71.0526	0.11	4	Bench press	181.1	71.6	28	0	1	12
High pre-set velocity loss	1	Bench press: 0.53 ms$^{-1}$; Squat: 0.70 ms$^{-1}$	1	1	62.2642	0.2	9	Bench press	181.1	71.6	28	0	1	12
High pre-set velocity loss	1	Bench press: 0.53 ms$^{-1}$; Squat: 0.70 ms$^{-1}$	2	2	54.717	0.24	6	Bench press	181.1	71.6	28	0	1	12
High pre-set velocity loss	2	Bench press: 0.45 ms$^{-1}$; Squat: 0.60 ms$^{-1}$	1	1	65.9091	0.15	5	Bench press	181.1	71.6	28	0	1	12
High pre-set velocity loss	2	Bench press: 0.45 ms$^{-1}$; Squat: 0.60 ms$^{-1}$	2	0	79.5455	0.09	6	Bench press	181.1	71.6	28	0	1	12
High pre-set velocity loss	2	Bench press: 0.45 ms$^{-1}$; Squat: 0.60 ms$^{-1}$	3	0	72.7273	0.12	4	Bench press	181.1	71.6	28	0	1	12
High pre-set velocity loss	2	Bench press: 0.38 ms$^{-1}$; Squat: 0.49 ms$^{-1}$	1	1	47.2222	0.19	4	Bench press	181.1	71.6	28	0	1	12
High pre-set velocity loss	2	Bench press: 0.38 ms$^{-1}$; Squat: 0.49 ms$^{-1}$	2	0	58.3333	0.15	3	Bench press	181.1	71.6	28	0	1	12
High pre-set velocity loss	2	Bench press: 0.38 ms$^{-1}$; Squat: 0.49 ms$^{-1}$	3	0	61.1111	0.14	3	Bench press	181.1	71.6	28	0	1	12
High pre-set velocity loss	2	Bench press: 0.53 ms$^{-1}$; Squat: 0.70 ms$^{-1}$	1	2	64	0.18	8	Bench press	181.1	71.6	28	0	1	12
High pre-set velocity loss	2	Bench press: 0.53 ms$^{-1}$; Squat: 0.70 ms$^{-1}$	2	1	68	0.16	6	Bench press	181.1	71.6	28	0	1	12
High pre-set velocity loss	2	Bench press: 0.53 ms$^{-1}$; Squat: 0.70 ms$^{-1}$	3	0	76	0.12	5	Bench press	181.1	71.6	28	0	1	12
High pre-set velocity loss	3	Bench press: 0.45 ms$^{-1}$; Squat: 0.60 ms$^{-1}$	1	1	58.9744	0.16	4	Bench press	181.1	71.6	28	0	1	12
High pre-set velocity loss	3	Bench press: 0.45 ms$^{-1}$; Squat: 0.60 ms$^{-1}$	2	2	46.1538	0.21	4	Bench press	181.1	71.6	28	0	1	12
High pre-set velocity loss	3	Bench press: 0.45 ms$^{-1}$; Squat: 0.60 ms$^{-1}$	3	0	64.1026	0.14	5	Bench press	181.1	71.6	28	0	1	12
High pre-set velocity loss	3	Bench press: 0.38 ms$^{-1}$; Squat: 0.49 ms$^{-1}$	1	1	45.7143	0.19	4	Bench press	181.1	71.6	28	0	1	12
High pre-set velocity loss	3	Bench press: 0.38 ms$^{-1}$; Squat: 0.49 ms$^{-1}$	2	1	51.4286	0.17	4	Bench press	181.1	71.6	28	0	1	12
High pre-set velocity loss	3	Bench press: 0.38 ms$^{-1}$; Squat: 0.49 ms$^{-1}$	3	0	68.5714	0.11	6	Bench press	181.1	71.6	28	0	1	12
High pre-set velocity loss	3	Bench press: 0.53 ms$^{-1}$; Squat: 0.70 ms$^{-1}$	1	3	59.2593	0.22	9	Bench press	181.1	71.6	28	0	1	12
High pre-set velocity loss	3	Bench press: 0.53 ms$^{-1}$; Squat: 0.70 ms$^{-1}$	2	2	50	0.27	8	Bench press	181.1	71.6	28	0	1	12
High pre-set velocity loss	3	Bench press: 0.53 ms$^{-1}$; Squat: 0.70 ms$^{-1}$	3	0	70.3704	0.16	8	Bench press	181.1	71.6	28	0	1	12
High pre-set velocity loss	4	Bench press: 0.45 ms$^{-1}$; Squat: 0.60 ms$^{-1}$	1	2	64.5833	0.17	7	Bench press	181.1	71.6	28	0	1	12
High pre-set velocity loss	4	Bench press: 0.45 ms$^{-1}$; Squat: 0.60 ms$^{-1}$	2	2	50	0.24	6	Bench press	181.1	71.6	28	0	1	12
High pre-set velocity loss	4	Bench press: 0.45 ms$^{-1}$; Squat: 0.60 ms$^{-1}$	3	0	68.75	0.15	8	Bench press	181.1	71.6	28	0	1	12
High pre-set velocity loss	4	Bench press: 0.38 ms$^{-1}$; Squat: 0.49 ms$^{-1}$	1	0	64.1026	0.14	5	Bench press	181.1	71.6	28	0	1	12
High pre-set velocity loss	4	Bench press: 0.38 ms$^{-1}$; Squat: 0.49 ms$^{-1}$	2	2	51.2821	0.19	3	Bench press	181.1	71.6	28	0	1	12
High pre-set velocity loss	4	Bench press: 0.38 ms$^{-1}$; Squat: 0.49 ms$^{-1}$	3	0	58.9744	0.16	5	Bench press	181.1	71.6	28	0	1	12
High pre-set velocity loss	4	Bench press: 0.53 ms$^{-1}$; Squat: 0.70 ms$^{-1}$	1	1	64.1509	0.19	9	Bench press	181.1	71.6	28	0	1	12
High pre-set velocity loss	4	Bench press: 0.53 ms$^{-1}$; Squat: 0.70 ms$^{-1}$	2	1	69.8113	0.16	8	Bench press	181.1	71.6	28	0	1	12
High pre-set velocity loss	4	Bench press: 0.53 ms$^{-1}$; Squat: 0.70 ms$^{-1}$	3	2	58.4906	0.22	6	Bench press	181.1	71.6	28	0	1	12
High pre-set velocity loss	5	Bench press: 0.45 ms$^{-1}$; Squat: 0.60 ms$^{-1}$	1	0	68.1818	0.14	7	Bench press	181.1	71.6	28	0	1	12
High pre-set velocity loss	5	Bench press: 0.45 ms$^{-1}$; Squat: 0.60 ms$^{-1}$	2	1	65.9091	0.15	6	Bench press	181.1	71.6	28	0	1	12
High pre-set velocity loss	5	Bench press: 0.45 ms$^{-1}$; Squat: 0.60 ms$^{-1}$	3	1	54.5455	0.2	6	Bench press	181.1	71.6	28	0	1	12
High pre-set velocity loss	5	Bench press: 0.38 ms$^{-1}$; Squat: 0.49 ms$^{-1}$	1	2	51.2821	0.19	3	Bench press	181.1	71.6	28	0	1	12
High pre-set velocity loss	5	Bench press: 0.38 ms$^{-1}$; Squat: 0.49 ms$^{-1}$	2	2	48.7179	0.2	4	Bench press	181.1	71.6	28	0	1	12
High pre-set velocity loss	5	Bench press: 0.38 ms$^{-1}$; Squat: 0.49 ms$^{-1}$	3	1	56.4103	0.17	4	Bench press	181.1	71.6	28	0	1	12
High pre-set velocity loss	5	Bench press: 0.53 ms$^{-1}$; Squat: 0.70 ms$^{-1}$	1	2	58	0.21	8	Bench press	181.1	71.6	28	0	1	12
High pre-set velocity loss	5	Bench press: 0.53 ms$^{-1}$; Squat: 0.70 ms$^{-1}$	2	0	72	0.14	9	Bench press	181.1	71.6	28	0	1	12
High pre-set velocity loss	5	Bench press: 0.53 ms$^{-1}$; Squat: 0.70 ms$^{-1}$	3	1	56	0.22	6	Bench press	181.1	71.6	28	0	1	12
High pre-set velocity loss	5	Bench press: 0.53 ms$^{-1}$; Squat: 0.70 ms$^{-1}$	4	1	68	0.16	6	Bench press	181.1	71.6	28	0	1	12
High pre-set velocity loss	6	Bench press: 0.45 ms$^{-1}$; Squat: 0.60 ms$^{-1}$	1	2	51.0638	0.23	6	Bench press	181.1	71.6	28	0	1	12
High pre-set velocity loss	6	Bench press: 0.45 ms$^{-1}$; Squat: 0.60 ms$^{-1}$	2	1	57.4468	0.2	6	Bench press	181.1	71.6	28	0	1	12
High pre-set velocity loss	6	Bench press: 0.45 ms$^{-1}$; Squat: 0.60 ms$^{-1}$	3	0	59.5745	0.19	7	Bench press	181.1	71.6	28	0	1	12
High pre-set velocity loss	6	Bench press: 0.45 ms$^{-1}$; Squat: 0.60 ms$^{-1}$	4	2	59.5745	0.19	5	Bench press	181.1	71.6	28	0	1	12
High pre-set velocity loss	6	Bench press: 0.38 ms$^{-1}$; Squat: 0.49 ms$^{-1}$	1	1	48.5714	0.18	4	Bench press	181.1	71.6	28	0	1	12
High pre-set velocity loss	6	Bench press: 0.38 ms$^{-1}$; Squat: 0.49 ms$^{-1}$	2	0	51.4286	0.17	4	Bench press	181.1	71.6	28	0	1	12
High pre-set velocity loss	6	Bench press: 0.38 ms$^{-1}$; Squat: 0.49 ms$^{-1}$	3	0	54.2857	0.16	3	Bench press	181.1	71.6	28	0	1	12
High pre-set velocity loss	6	Bench press: 0.38 ms$^{-1}$; Squat: 0.49 ms$^{-1}$	4	1	54.2857	0.16	3	Bench press	181.1	71.6	28	0	1	12
High pre-set velocity loss	6	Bench press: 0.53 ms$^{-1}$; Squat: 0.70 ms$^{-1}$	1	3	52.8302	0.25	8	Bench press	181.1	71.6	28	0	1	12
High pre-set velocity loss	6	Bench press: 0.53 ms$^{-1}$; Squat: 0.70 ms$^{-1}$	2	2	56.6038	0.23	7	Bench press	181.1	71.6	28	0	1	12
High pre-set velocity loss	6	Bench press: 0.53 ms$^{-1}$; Squat: 0.70 ms$^{-1}$	3	2	54.717	0.24	6	Bench press	181.1	71.6	28	0	1	12
High pre-set velocity loss	6	Bench press: 0.53 ms$^{-1}$; Squat: 0.70 ms$^{-1}$	4	1	64.1509	0.19	5	Bench press	181.1	71.6	28	0	1	12
High pre-set velocity loss	1	Bench press: 0.45 ms$^{-1}$; Squat: 0.60 ms$^{-1}$	1	3	40.678	0.35	5	Squat	181.1	71.6	28	0	1	12
High pre-set velocity loss	1	Bench press: 0.45 ms$^{-1}$; Squat: 0.60 ms$^{-1}$	2	3	30.5085	0.41	4	Squat	181.1	71.6	28	0	1	12
High pre-set velocity loss	1	Bench press: 0.38 ms$^{-1}$; Squat: 0.49 ms$^{-1}$	1	1	30.4348	0.32	2	Squat	181.1	71.6	28	0	1	12
High pre-set velocity loss	1	Bench press: 0.38 ms$^{-1}$; Squat: 0.49 ms$^{-1}$	2	0	45.6522	0.25	3	Squat	181.1	71.6	28	0	1	12
High pre-set velocity loss	1	Bench press: 0.53 ms$^{-1}$; Squat: 0.70 ms$^{-1}$	1	0	60	0.28	7	Squat	181.1	71.6	28	0	1	12
High pre-set velocity loss	1	Bench press: 0.53 ms$^{-1}$; Squat: 0.70 ms$^{-1}$	2	2	42.8571	0.4	4	Squat	181.1	71.6	28	0	1	12
High pre-set velocity loss	2	Bench press: 0.45 ms$^{-1}$; Squat: 0.60 ms$^{-1}$	1	2	46.6667	0.32	4	Squat	181.1	71.6	28	0	1	12
High pre-set velocity loss	2	Bench press: 0.45 ms$^{-1}$; Squat: 0.60 ms$^{-1}$	2	2	36.6667	0.38	3	Squat	181.1	71.6	28	0	1	12
High pre-set velocity loss	2	Bench press: 0.45 ms$^{-1}$; Squat: 0.60 ms$^{-1}$	3	1	48.3333	0.31	3	Squat	181.1	71.6	28	0	1	12
High pre-set velocity loss	2	Bench press: 0.38 ms$^{-1}$; Squat: 0.49 ms$^{-1}$	1	0	51.0638	0.23	3	Squat	181.1	71.6	28	0	1	12
High pre-set velocity loss	2	Bench press: 0.38 ms$^{-1}$; Squat: 0.49 ms$^{-1}$	2	1	42.5532	0.27	2	Squat	181.1	71.6	28	0	1	12
High pre-set velocity loss	2	Bench press: 0.38 ms$^{-1}$; Squat: 0.49 ms$^{-1}$	3	1	29.7872	0.33	2	Squat	181.1	71.6	28	0	1	12
High pre-set velocity loss	2	Bench press: 0.53 ms$^{-1}$; Squat: 0.70 ms$^{-1}$	1	3	42.8571	0.4	5	Squat	181.1	71.6	28	0	1	12
High pre-set velocity loss	2	Bench press: 0.53 ms$^{-1}$; Squat: 0.70 ms$^{-1}$	2	2	42.8571	0.4	3	Squat	181.1	71.6	28	0	1	12
High pre-set velocity loss	2	Bench press: 0.53 ms$^{-1}$; Squat: 0.70 ms$^{-1}$	3	0	57.1429	0.3	6	Squat	181.1	71.6	28	0	1	12
High pre-set velocity loss	3	Bench press: 0.45 ms$^{-1}$; Squat: 0.60 ms$^{-1}$	1	1	48.3333	0.31	5	Squat	181.1	71.6	28	0	1	12
High pre-set velocity loss	3	Bench press: 0.45 ms$^{-1}$; Squat: 0.60 ms$^{-1}$	2	1	40	0.36	4	Squat	181.1	71.6	28	0	1	12
High pre-set velocity loss	3	Bench press: 0.45 ms$^{-1}$; Squat: 0.60 ms$^{-1}$	3	0	43.3333	0.34	3	Squat	181.1	71.6	28	0	1	12
High pre-set velocity loss	3	Bench press: 0.38 ms$^{-1}$; Squat: 0.49 ms$^{-1}$	1	0	41.3043	0.27	2	Squat	181.1	71.6	28	0	1	12
High pre-set velocity loss	3	Bench press: 0.38 ms$^{-1}$; Squat: 0.49 ms$^{-1}$	2	0	43.4783	0.26	2	Squat	181.1	71.6	28	0	1	12
High pre-set velocity loss	3	Bench press: 0.38 ms$^{-1}$; Squat: 0.49 ms$^{-1}$	3	0	30.4348	0.32	1	Squat	181.1	71.6	28	0	1	12
High pre-set velocity loss	3	Bench press: 0.53 ms$^{-1}$; Squat: 0.70 ms$^{-1}$	1	3	44.7761	0.37	4	Squat	181.1	71.6	28	0	1	12
High pre-set velocity loss	3	Bench press: 0.53 ms$^{-1}$; Squat: 0.70 ms$^{-1}$	2	2	44.7761	0.37	5	Squat	181.1	71.6	28	0	1	12
High pre-set velocity loss	3	Bench press: 0.53 ms$^{-1}$; Squat: 0.70 ms$^{-1}$	3	2	43.2836	0.38	3	Squat	181.1	71.6	28	0	1	12
High pre-set velocity loss	4	Bench press: 0.45 ms$^{-1}$; Squat: 0.60 ms$^{-1}$	1	3	38.5965	0.35	3	Squat	181.1	71.6	28	0	1	12
High pre-set velocity loss	4	Bench press: 0.45 ms$^{-1}$; Squat: 0.60 ms$^{-1}$	2	1	40.3509	0.34	4	Squat	181.1	71.6	28	0	1	12
High pre-set velocity loss	4	Bench press: 0.45 ms$^{-1}$; Squat: 0.60 ms$^{-1}$	3	1	42.1053	0.33	3	Squat	181.1	71.6	28	0	1	12
High pre-set velocity loss	4	Bench press: 0.38 ms$^{-1}$; Squat: 0.49 ms$^{-1}$	1	2	26	0.37	2	Squat	181.1	71.6	28	0	1	12
High pre-set velocity loss	4	Bench press: 0.38 ms$^{-1}$; Squat: 0.49 ms$^{-1}$	2	2	18	0.41	2	Squat	181.1	71.6	28	0	1	12
High pre-set velocity loss	4	Bench press: 0.38 ms$^{-1}$; Squat: 0.49 ms$^{-1}$	3	1	42	0.29	3	Squat	181.1	71.6	28	0	1	12
High pre-set velocity loss	4	Bench press: 0.53 ms$^{-1}$; Squat: 0.70 ms$^{-1}$	1	2	35.2113	0.46	5	Squat	181.1	71.6	28	0	1	12
High pre-set velocity loss	4	Bench press: 0.53 ms$^{-1}$; Squat: 0.70 ms$^{-1}$	2	1	43.662	0.4	5	Squat	181.1	71.6	28	0	1	12
High pre-set velocity loss	4	Bench press: 0.53 ms$^{-1}$; Squat: 0.70 ms$^{-1}$	3	1	40.8451	0.42	4	Squat	181.1	71.6	28	0	1	12
High pre-set velocity loss	5	Bench press: 0.45 ms$^{-1}$; Squat: 0.60 ms$^{-1}$	1	0	26.6667	0.44	4	Squat	181.1	71.6	28	0	1	12
High pre-set velocity loss	5	Bench press: 0.45 ms$^{-1}$; Squat: 0.60 ms$^{-1}$	2	1	46.6667	0.32	3	Squat	181.1	71.6	28	0	1	12
High pre-set velocity loss	5	Bench press: 0.45 ms$^{-1}$; Squat: 0.60 ms$^{-1}$	3	1	40	0.36	3	Squat	181.1	71.6	28	0	1	12
High pre-set velocity loss	5	Bench press: 0.45 ms$^{-1}$; Squat: 0.60 ms$^{-1}$	4	1	43.3333	0.34	2	Squat	181.1	71.6	28	0	1	12
High pre-set velocity loss	5	Bench press: 0.38 ms$^{-1}$; Squat: 0.49 ms$^{-1}$	1	2	35.2941	0.33	3	Squat	181.1	71.6	28	0	1	12
High pre-set velocity loss	5	Bench press: 0.38 ms$^{-1}$; Squat: 0.49 ms$^{-1}$	2	0	47.0588	0.27	4	Squat	181.1	71.6	28	0	1	12
High pre-set velocity loss	5	Bench press: 0.38 ms$^{-1}$; Squat: 0.49 ms$^{-1}$	3	1	31.3725	0.35	2	Squat	181.1	71.6	28	0	1	12
High pre-set velocity loss	5	Bench press: 0.38 ms$^{-1}$; Squat: 0.49 ms$^{-1}$	4	0	47.0588	0.27	3	Squat	181.1	71.6	28	0	1	12
High pre-set velocity loss	5	Bench press: 0.53 ms$^{-1}$; Squat: 0.70 ms$^{-1}$	1	3	33.3333	0.46	5	Squat	181.1	71.6	28	0	1	12
High pre-set velocity loss	5	Bench press: 0.53 ms$^{-1}$; Squat: 0.70 ms$^{-1}$	2	2	43.4783	0.39	5	Squat	181.1	71.6	28	0	1	12
High pre-set velocity loss	5	Bench press: 0.53 ms$^{-1}$; Squat: 0.70 ms$^{-1}$	3	2	34.7826	0.45	4	Squat	181.1	71.6	28	0	1	12
High pre-set velocity loss	5	Bench press: 0.53 ms$^{-1}$; Squat: 0.70 ms$^{-1}$	4	3	39.1304	0.42	3	Squat	181.1	71.6	28	0	1	12
High pre-set velocity loss	6	Bench press: 0.45 ms$^{-1}$; Squat: 0.60 ms$^{-1}$	1	1	42.8571	0.32	4	Squat	181.1	71.6	28	0	1	12
High pre-set velocity loss	6	Bench press: 0.45 ms$^{-1}$; Squat: 0.60 ms$^{-1}$	2	1	37.5	0.35	3	Squat	181.1	71.6	28	0	1	12
High pre-set velocity loss	6	Bench press: 0.45 ms$^{-1}$; Squat: 0.60 ms$^{-1}$	3	0	48.2143	0.29	4	Squat	181.1	71.6	28	0	1	12
High pre-set velocity loss	6	Bench press: 0.45 ms$^{-1}$; Squat: 0.60 ms$^{-1}$	4	1	35.7143	0.36	3	Squat	181.1	71.6	28	0	1	12
High pre-set velocity loss	6	Bench press: 0.38 ms$^{-1}$; Squat: 0.49 ms$^{-1}$	1	1	35.8491	0.34	4	Squat	181.1	71.6	28	0	1	12
High pre-set velocity loss	6	Bench press: 0.38 ms$^{-1}$; Squat: 0.49 ms$^{-1}$	2	0	50.9434	0.26	3	Squat	181.1	71.6	28	0	1	12
High pre-set velocity loss	6	Bench press: 0.38 ms$^{-1}$; Squat: 0.49 ms$^{-1}$	3	1	43.3962	0.3	3	Squat	181.1	71.6	28	0	1	12
High pre-set velocity loss	6	Bench press: 0.38 ms$^{-1}$; Squat: 0.49 ms$^{-1}$	4	0	39.6226	0.32	4	Squat	181.1	71.6	28	0	1	12
High pre-set velocity loss	6	Bench press: 0.53 ms$^{-1}$; Squat: 0.70 ms$^{-1}$	1	3	27.6923	0.47	4	Squat	181.1	71.6	28	0	1	12
High pre-set velocity loss	6	Bench press: 0.53 ms$^{-1}$; Squat: 0.70 ms$^{-1}$	2	1	43.0769	0.37	6	Squat	181.1	71.6	28	0	1	12
High pre-set velocity loss	6	Bench press: 0.53 ms$^{-1}$; Squat: 0.70 ms$^{-1}$	3	1	41.5385	0.38	4	Squat	181.1	71.6	28	0	1	12
High pre-set velocity loss	6	Bench press: 0.53 ms$^{-1}$; Squat: 0.70 ms$^{-1}$	4	2	38.4615	0.4	4	Squat	181.1	71.6	28	0	1	12
Low pre-set velocity loss	1	Bench press: 0.45 ms$^{-1}$; Squat: 0.60 ms$^{-1}$	1	1	36.1111	0.23	3	Bench press	183.7	73.7	32	1	1	13
Low pre-set velocity loss	1	Bench press: 0.45 ms$^{-1}$; Squat: 0.60 ms$^{-1}$	2	2	38.8889	0.22	3	Bench press	183.7	73.7	32	1	1	13
Low pre-set velocity loss	1	Bench press: 0.45 ms$^{-1}$; Squat: 0.60 ms$^{-1}$	3	2	30.5556	0.25	3	Bench press	183.7	73.7	32	1	1	13
Low pre-set velocity loss	1	Bench press: 0.38 ms$^{-1}$; Squat: 0.49 ms$^{-1}$	1	3	42.1053	0.22	3	Bench press	183.7	73.7	32	1	1	13
Low pre-set velocity loss	1	Bench press: 0.38 ms$^{-1}$; Squat: 0.49 ms$^{-1}$	2	1	52.6316	0.18	3	Bench press	183.7	73.7	32	1	1	13
Low pre-set velocity loss	1	Bench press: 0.38 ms$^{-1}$; Squat: 0.49 ms$^{-1}$	3	2	31.5789	0.26	2	Bench press	183.7	73.7	32	1	1	13
Low pre-set velocity loss	1	Bench press: 0.38 ms$^{-1}$; Squat: 0.49 ms$^{-1}$	4	2	42.1053	0.22	2	Bench press	183.7	73.7	32	1	1	13
Low pre-set velocity loss	1	Bench press: 0.53 ms$^{-1}$; Squat: 0.70 ms$^{-1}$	1	4	40.7407	0.32	4	Bench press	183.7	73.7	32	1	1	13
Low pre-set velocity loss	1	Bench press: 0.53 ms$^{-1}$; Squat: 0.70 ms$^{-1}$	2	4	35.1852	0.35	5	Bench press	183.7	73.7	32	1	1	13
Low pre-set velocity loss	1	Bench press: 0.53 ms$^{-1}$; Squat: 0.70 ms$^{-1}$	4	3	27.7778	0.39	3	Bench press	183.7	73.7	32	1	1	13
Low pre-set velocity loss	1	Bench press: 0.53 ms$^{-1}$; Squat: 0.70 ms$^{-1}$	5	4	37.037	0.34	4	Bench press	183.7	73.7	32	1	1	13
Low pre-set velocity loss	2	Bench press: 0.45 ms$^{-1}$; Squat: 0.60 ms$^{-1}$	1	2	30.2326	0.3	3	Bench press	183.7	73.7	32	1	1	13
Low pre-set velocity loss	2	Bench press: 0.45 ms$^{-1}$; Squat: 0.60 ms$^{-1}$	2	2	30.2326	0.3	3	Bench press	183.7	73.7	32	1	1	13
Low pre-set velocity loss	2	Bench press: 0.45 ms$^{-1}$; Squat: 0.60 ms$^{-1}$	3	3	39.5349	0.26	4	Bench press	183.7	73.7	32	1	1	13
Low pre-set velocity loss	2	Bench press: 0.45 ms$^{-1}$; Squat: 0.60 ms$^{-1}$	4	2	34.8837	0.28	3	Bench press	183.7	73.7	32	1	1	13
Low pre-set velocity loss	2	Bench press: 0.45 ms$^{-1}$; Squat: 0.60 ms$^{-1}$	5	2	27.907	0.31	2	Bench press	183.7	73.7	32	1	1	13
Low pre-set velocity loss	2	Bench press: 0.45 ms$^{-1}$; Squat: 0.60 ms$^{-1}$	6	2	30.2326	0.3	3	Bench press	183.7	73.7	32	1	1	13
Low pre-set velocity loss	2	Bench press: 0.45 ms$^{-1}$; Squat: 0.60 ms$^{-1}$	7	1	37.2093	0.27	3	Bench press	183.7	73.7	32	1	1	13
Low pre-set velocity loss	2	Bench press: 0.38 ms$^{-1}$; Squat: 0.49 ms$^{-1}$	1	3	30	0.28	4	Bench press	183.7	73.7	32	1	1	13
Low pre-set velocity loss	2	Bench press: 0.38 ms$^{-1}$; Squat: 0.49 ms$^{-1}$	2	2	52.5	0.19	4	Bench press	183.7	73.7	32	1	1	13
Low pre-set velocity loss	2	Bench press: 0.38 ms$^{-1}$; Squat: 0.49 ms$^{-1}$	3	2	35	0.26	3	Bench press	183.7	73.7	32	1	1	13
Low pre-set velocity loss	2	Bench press: 0.38 ms$^{-1}$; Squat: 0.49 ms$^{-1}$	4	2	32.5	0.27	3	Bench press	183.7	73.7	32	1	1	13
Low pre-set velocity loss	2	Bench press: 0.38 ms$^{-1}$; Squat: 0.49 ms$^{-1}$	5	2	25	0.3	2	Bench press	183.7	73.7	32	1	1	13
Low pre-set velocity loss	2	Bench press: 0.38 ms$^{-1}$; Squat: 0.49 ms$^{-1}$	6	2	37.5	0.25	3	Bench press	183.7	73.7	32	1	1	13
Low pre-set velocity loss	2	Bench press: 0.38 ms$^{-1}$; Squat: 0.49 ms$^{-1}$	7	2	47.5	0.21	3	Bench press	183.7	73.7	32	1	1	13
Low pre-set velocity loss	2	Bench press: 0.53 ms$^{-1}$; Squat: 0.70 ms$^{-1}$	1	4	29.3103	0.41	7	Bench press	183.7	73.7	32	1	1	13
Low pre-set velocity loss	2	Bench press: 0.53 ms$^{-1}$; Squat: 0.70 ms$^{-1}$	2	4	31.0345	0.4	8	Bench press	183.7	73.7	32	1	1	13
Low pre-set velocity loss	2	Bench press: 0.53 ms$^{-1}$; Squat: 0.70 ms$^{-1}$	3	3	29.3103	0.41	5	Bench press	183.7	73.7	32	1	1	13
Low pre-set velocity loss	2	Bench press: 0.53 ms$^{-1}$; Squat: 0.70 ms$^{-1}$	4	3	34.4828	0.38	6	Bench press	183.7	73.7	32	1	1	13
Low pre-set velocity loss	3	Bench press: 0.45 ms$^{-1}$; Squat: 0.60 ms$^{-1}$	1	4	30.6122	0.34	5	Bench press	183.7	73.7	32	1	1	13
Low pre-set velocity loss	3	Bench press: 0.45 ms$^{-1}$; Squat: 0.60 ms$^{-1}$	3	3	30.6122	0.34	4	Bench press	183.7	73.7	32	1	1	13
Low pre-set velocity loss	3	Bench press: 0.45 ms$^{-1}$; Squat: 0.60 ms$^{-1}$	4	2	30.6122	0.34	4	Bench press	183.7	73.7	32	1	1	13
Low pre-set velocity loss	3	Bench press: 0.38 ms$^{-1}$; Squat: 0.49 ms$^{-1}$	1	3	31.5789	0.26	3	Bench press	183.7	73.7	32	1	1	13
Low pre-set velocity loss	3	Bench press: 0.38 ms$^{-1}$; Squat: 0.49 ms$^{-1}$	2	2	42.1053	0.22	3	Bench press	183.7	73.7	32	1	1	13
Low pre-set velocity loss	3	Bench press: 0.38 ms$^{-1}$; Squat: 0.49 ms$^{-1}$	3	2	23.6842	0.29	2	Bench press	183.7	73.7	32	1	1	13
Low pre-set velocity loss	3	Bench press: 0.38 ms$^{-1}$; Squat: 0.49 ms$^{-1}$	4	2	28.9474	0.27	2	Bench press	183.7	73.7	32	1	1	13
Low pre-set velocity loss	3	Bench press: 0.38 ms$^{-1}$; Squat: 0.49 ms$^{-1}$	5	3	39.4737	0.23	3	Bench press	183.7	73.7	32	1	1	13
Low pre-set velocity loss	3	Bench press: 0.53 ms$^{-1}$; Squat: 0.70 ms$^{-1}$	1	4	35.1852	0.35	6	Bench press	183.7	73.7	32	1	1	13
Low pre-set velocity loss	3	Bench press: 0.53 ms$^{-1}$; Squat: 0.70 ms$^{-1}$	2	3	29.6296	0.38	5	Bench press	183.7	73.7	32	1	1	13
Low pre-set velocity loss	3	Bench press: 0.53 ms$^{-1}$; Squat: 0.70 ms$^{-1}$	3	2	29.6296	0.38	5	Bench press	183.7	73.7	32	1	1	13
Low pre-set velocity loss	3	Bench press: 0.53 ms$^{-1}$; Squat: 0.70 ms$^{-1}$	4	3	25.9259	0.4	4	Bench press	183.7	73.7	32	1	1	13
Low pre-set velocity loss	3	Bench press: 0.53 ms$^{-1}$; Squat: 0.70 ms$^{-1}$	5	2	38.8889	0.33	5	Bench press	183.7	73.7	32	1	1	13
Low pre-set velocity loss	3	Bench press: 0.53 ms$^{-1}$; Squat: 0.70 ms$^{-1}$	6	1	31.4815	0.37	4	Bench press	183.7	73.7	32	1	1	13
Low pre-set velocity loss	4	Bench press: 0.45 ms$^{-1}$; Squat: 0.60 ms$^{-1}$	1	4	40.9091	0.26	4	Bench press	183.7	73.7	32	1	1	13
Low pre-set velocity loss	4	Bench press: 0.45 ms$^{-1}$; Squat: 0.60 ms$^{-1}$	3	3	36.3636	0.28	3	Bench press	183.7	73.7	32	1	1	13
Low pre-set velocity loss	4	Bench press: 0.45 ms$^{-1}$; Squat: 0.60 ms$^{-1}$	4	3	40.9091	0.26	3	Bench press	183.7	73.7	32	1	1	13
Low pre-set velocity loss	4	Bench press: 0.45 ms$^{-1}$; Squat: 0.60 ms$^{-1}$	5	4	25	0.33	2	Bench press	183.7	73.7	32	1	1	13
Low pre-set velocity loss	4	Bench press: 0.45 ms$^{-1}$; Squat: 0.60 ms$^{-1}$	6	3	29.5455	0.31	3	Bench press	183.7	73.7	32	1	1	13
Low pre-set velocity loss	4	Bench press: 0.38 ms$^{-1}$; Squat: 0.49 ms$^{-1}$	1	2	34.2105	0.25	3	Bench press	183.7	73.7	32	1	1	13
Low pre-set velocity loss	4	Bench press: 0.38 ms$^{-1}$; Squat: 0.49 ms$^{-1}$	2	2	39.4737	0.23	3	Bench press	183.7	73.7	32	1	1	13
Low pre-set velocity loss	4	Bench press: 0.38 ms$^{-1}$; Squat: 0.49 ms$^{-1}$	3	1	28.9474	0.27	2	Bench press	183.7	73.7	32	1	1	13
Low pre-set velocity loss	4	Bench press: 0.38 ms$^{-1}$; Squat: 0.49 ms$^{-1}$	4	2	26.3158	0.28	2	Bench press	183.7	73.7	32	1	1	13
Low pre-set velocity loss	4	Bench press: 0.38 ms$^{-1}$; Squat: 0.49 ms$^{-1}$	5	1	36.8421	0.24	2	Bench press	183.7	73.7	32	1	1	13
Low pre-set velocity loss	4	Bench press: 0.38 ms$^{-1}$; Squat: 0.49 ms$^{-1}$	6	1	34.2105	0.25	2	Bench press	183.7	73.7	32	1	1	13
Low pre-set velocity loss	4	Bench press: 0.53 ms$^{-1}$; Squat: 0.70 ms$^{-1}$	1	4	32.0755	0.36	6	Bench press	183.7	73.7	32	1	1	13
Low pre-set velocity loss	4	Bench press: 0.53 ms$^{-1}$; Squat: 0.70 ms$^{-1}$	2	3	28.3019	0.38	6	Bench press	183.7	73.7	32	1	1	13
Low pre-set velocity loss	4	Bench press: 0.53 ms$^{-1}$; Squat: 0.70 ms$^{-1}$	3	4	32.0755	0.36	7	Bench press	183.7	73.7	32	1	1	13
Low pre-set velocity loss	4	Bench press: 0.53 ms$^{-1}$; Squat: 0.70 ms$^{-1}$	4	3	32.0755	0.36	7	Bench press	183.7	73.7	32	1	1	13
Low pre-set velocity loss	4	Bench press: 0.53 ms$^{-1}$; Squat: 0.70 ms$^{-1}$	5	3	35.8491	0.34	6	Bench press	183.7	73.7	32	1	1	13
Low pre-set velocity loss	5	Bench press: 0.45 ms$^{-1}$; Squat: 0.60 ms$^{-1}$	1	4	28.2609	0.33	5	Bench press	183.7	73.7	32	1	1	13
Low pre-set velocity loss	5	Bench press: 0.45 ms$^{-1}$; Squat: 0.60 ms$^{-1}$	2	3	39.1304	0.28	6	Bench press	183.7	73.7	32	1	1	13
Low pre-set velocity loss	5	Bench press: 0.45 ms$^{-1}$; Squat: 0.60 ms$^{-1}$	3	3	41.3043	0.27	6	Bench press	183.7	73.7	32	1	1	13
Low pre-set velocity loss	5	Bench press: 0.45 ms$^{-1}$; Squat: 0.60 ms$^{-1}$	4	3	43.4783	0.26	7	Bench press	183.7	73.7	32	1	1	13
Low pre-set velocity loss	5	Bench press: 0.38 ms$^{-1}$; Squat: 0.49 ms$^{-1}$	1	2	26.3158	0.28	3	Bench press	183.7	73.7	32	1	1	13
Low pre-set velocity loss	5	Bench press: 0.38 ms$^{-1}$; Squat: 0.49 ms$^{-1}$	2	2	28.9474	0.27	3	Bench press	183.7	73.7	32	1	1	13
Low pre-set velocity loss	5	Bench press: 0.38 ms$^{-1}$; Squat: 0.49 ms$^{-1}$	3	2	39.4737	0.23	4	Bench press	183.7	73.7	32	1	1	13
Low pre-set velocity loss	5	Bench press: 0.38 ms$^{-1}$; Squat: 0.49 ms$^{-1}$	4	2	34.2105	0.25	3	Bench press	183.7	73.7	32	1	1	13
Low pre-set velocity loss	5	Bench press: 0.38 ms$^{-1}$; Squat: 0.49 ms$^{-1}$	5	1	44.7368	0.21	3	Bench press	183.7	73.7	32	1	1	13
Low pre-set velocity loss	5	Bench press: 0.53 ms$^{-1}$; Squat: 0.70 ms$^{-1}$	1	4	45.614	0.31	9	Bench press	183.7	73.7	32	1	1	13
Low pre-set velocity loss	6	Bench press: 0.45 ms$^{-1}$; Squat: 0.60 ms$^{-1}$	1	4	30.4348	0.32	5	Bench press	183.7	73.7	32	1	1	13
Low pre-set velocity loss	6	Bench press: 0.45 ms$^{-1}$; Squat: 0.60 ms$^{-1}$	2	3	30.4348	0.32	4	Bench press	183.7	73.7	32	1	1	13
Low pre-set velocity loss	6	Bench press: 0.45 ms$^{-1}$; Squat: 0.60 ms$^{-1}$	3	3	30.4348	0.32	4	Bench press	183.7	73.7	32	1	1	13
Low pre-set velocity loss	6	Bench press: 0.45 ms$^{-1}$; Squat: 0.60 ms$^{-1}$	4	3	32.6087	0.31	4	Bench press	183.7	73.7	32	1	1	13
Low pre-set velocity loss	6	Bench press: 0.45 ms$^{-1}$; Squat: 0.60 ms$^{-1}$	5	2	34.7826	0.3	5	Bench press	183.7	73.7	32	1	1	13
Low pre-set velocity loss	6	Bench press: 0.45 ms$^{-1}$; Squat: 0.60 ms$^{-1}$	6	2	28.2609	0.33	5	Bench press	183.7	73.7	32	1	1	13
Low pre-set velocity loss	6	Bench press: 0.38 ms$^{-1}$; Squat: 0.49 ms$^{-1}$	1	2	27.027	0.27	2	Bench press	183.7	73.7	32	1	1	13
Low pre-set velocity loss	6	Bench press: 0.38 ms$^{-1}$; Squat: 0.49 ms$^{-1}$	2	2	32.4324	0.25	3	Bench press	183.7	73.7	32	1	1	13
Low pre-set velocity loss	6	Bench press: 0.38 ms$^{-1}$; Squat: 0.49 ms$^{-1}$	3	2	35.1351	0.24	3	Bench press	183.7	73.7	32	1	1	13
Low pre-set velocity loss	6	Bench press: 0.38 ms$^{-1}$; Squat: 0.49 ms$^{-1}$	4	2	51.3514	0.18	3	Bench press	183.7	73.7	32	1	1	13
Low pre-set velocity loss	6	Bench press: 0.38 ms$^{-1}$; Squat: 0.49 ms$^{-1}$	5	1	27.027	0.27	2	Bench press	183.7	73.7	32	1	1	13
Low pre-set velocity loss	6	Bench press: 0.38 ms$^{-1}$; Squat: 0.49 ms$^{-1}$	6	1	24.3243	0.28	2	Bench press	183.7	73.7	32	1	1	13
Low pre-set velocity loss	6	Bench press: 0.38 ms$^{-1}$; Squat: 0.49 ms$^{-1}$	7	2	21.6216	0.29	2	Bench press	183.7	73.7	32	1	1	13
Low pre-set velocity loss	6	Bench press: 0.38 ms$^{-1}$; Squat: 0.49 ms$^{-1}$	8	1	27.027	0.27	2	Bench press	183.7	73.7	32	1	1	13
Low pre-set velocity loss	6	Bench press: 0.53 ms$^{-1}$; Squat: 0.70 ms$^{-1}$	1	4	36	0.32	4	Bench press	183.7	73.7	32	1	1	13
Low pre-set velocity loss	6	Bench press: 0.53 ms$^{-1}$; Squat: 0.70 ms$^{-1}$	2	3	26	0.37	3	Bench press	183.7	73.7	32	1	1	13
Low pre-set velocity loss	6	Bench press: 0.53 ms$^{-1}$; Squat: 0.70 ms$^{-1}$	3	2	24	0.38	2	Bench press	183.7	73.7	32	1	1	13
Low pre-set velocity loss	6	Bench press: 0.53 ms$^{-1}$; Squat: 0.70 ms$^{-1}$	4	2	30	0.35	2	Bench press	183.7	73.7	32	1	1	13
Low pre-set velocity loss	6	Bench press: 0.53 ms$^{-1}$; Squat: 0.70 ms$^{-1}$	5	2	28	0.36	4	Bench press	183.7	73.7	32	1	1	13
Low pre-set velocity loss	6	Bench press: 0.53 ms$^{-1}$; Squat: 0.70 ms$^{-1}$	6	2	28	0.36	4	Bench press	183.7	73.7	32	1	1	13
Low pre-set velocity loss	6	Bench press: 0.53 ms$^{-1}$; Squat: 0.70 ms$^{-1}$	7	2	24	0.38	4	Bench press	183.7	73.7	32	1	1	13
Low pre-set velocity loss	6	Bench press: 0.53 ms$^{-1}$; Squat: 0.70 ms$^{-1}$	8	2	30	0.35	5	Bench press	183.7	73.7	32	1	1	13
Low pre-set velocity loss	6	Bench press: 0.53 ms$^{-1}$; Squat: 0.70 ms$^{-1}$	9	2	42	0.29	5	Bench press	183.7	73.7	32	1	1	13
High pre-set velocity loss	1	Bench press: 0.45 ms$^{-1}$; Squat: 0.60 ms$^{-1}$	1	0	60	0.14	5	Bench press	183.7	73.7	32	1	2	13
High pre-set velocity loss	1	Bench press: 0.45 ms$^{-1}$; Squat: 0.60 ms$^{-1}$	2	0	60	0.14	4	Bench press	183.7	73.7	32	1	2	13
High pre-set velocity loss	1	Bench press: 0.38 ms$^{-1}$; Squat: 0.49 ms$^{-1}$	1	0	65	0.14	5	Bench press	183.7	73.7	32	1	2	13
High pre-set velocity loss	1	Bench press: 0.38 ms$^{-1}$; Squat: 0.49 ms$^{-1}$	2	0	65	0.14	3	Bench press	183.7	73.7	32	1	2	13
High pre-set velocity loss	1	Bench press: 0.53 ms$^{-1}$; Squat: 0.70 ms$^{-1}$	1	1	60	0.18	6	Bench press	183.7	73.7	32	1	2	13
High pre-set velocity loss	1	Bench press: 0.53 ms$^{-1}$; Squat: 0.70 ms$^{-1}$	2	0	60	0.18	5	Bench press	183.7	73.7	32	1	2	13
High pre-set velocity loss	2	Bench press: 0.45 ms$^{-1}$; Squat: 0.60 ms$^{-1}$	1	2	62.2642	0.2	9	Bench press	183.7	73.7	32	1	2	13
High pre-set velocity loss	2	Bench press: 0.45 ms$^{-1}$; Squat: 0.60 ms$^{-1}$	2	1	67.9245	0.17	7	Bench press	183.7	73.7	32	1	2	13
High pre-set velocity loss	2	Bench press: 0.45 ms$^{-1}$; Squat: 0.60 ms$^{-1}$	3	0	67.9245	0.17	7	Bench press	183.7	73.7	32	1	2	13
High pre-set velocity loss	2	Bench press: 0.38 ms$^{-1}$; Squat: 0.49 ms$^{-1}$	1	1	51.4286	0.17	5	Bench press	183.7	73.7	32	1	2	13
High pre-set velocity loss	2	Bench press: 0.38 ms$^{-1}$; Squat: 0.49 ms$^{-1}$	2	0	62.8571	0.13	4	Bench press	183.7	73.7	32	1	2	13
High pre-set velocity loss	2	Bench press: 0.38 ms$^{-1}$; Squat: 0.49 ms$^{-1}$	3	0	57.1429	0.15	4	Bench press	183.7	73.7	32	1	2	13
High pre-set velocity loss	2	Bench press: 0.53 ms$^{-1}$; Squat: 0.70 ms$^{-1}$	1	0	76.087	0.11	8	Bench press	183.7	73.7	32	1	2	13
High pre-set velocity loss	2	Bench press: 0.53 ms$^{-1}$; Squat: 0.70 ms$^{-1}$	2	0	63.0435	0.17	5	Bench press	183.7	73.7	32	1	2	13
High pre-set velocity loss	2	Bench press: 0.53 ms$^{-1}$; Squat: 0.70 ms$^{-1}$	3	0	65.2174	0.16	5	Bench press	183.7	73.7	32	1	2	13
High pre-set velocity loss	3	Bench press: 0.45 ms$^{-1}$; Squat: 0.60 ms$^{-1}$	1	1	65.1163	0.15	6	Bench press	183.7	73.7	32	1	2	13
High pre-set velocity loss	3	Bench press: 0.45 ms$^{-1}$; Squat: 0.60 ms$^{-1}$	2	1	41.8605	0.25	5	Bench press	183.7	73.7	32	1	2	13
High pre-set velocity loss	3	Bench press: 0.45 ms$^{-1}$; Squat: 0.60 ms$^{-1}$	3	0	58.1395	0.18	5	Bench press	183.7	73.7	32	1	2	13
High pre-set velocity loss	3	Bench press: 0.38 ms$^{-1}$; Squat: 0.49 ms$^{-1}$	1	0	63.8889	0.13	4	Bench press	183.7	73.7	32	1	2	13
High pre-set velocity loss	3	Bench press: 0.38 ms$^{-1}$; Squat: 0.49 ms$^{-1}$	2	0	75	0.09	4	Bench press	183.7	73.7	32	1	2	13
High pre-set velocity loss	3	Bench press: 0.38 ms$^{-1}$; Squat: 0.49 ms$^{-1}$	3	0	44.4444	0.2	2	Bench press	183.7	73.7	32	1	2	13
High pre-set velocity loss	3	Bench press: 0.53 ms$^{-1}$; Squat: 0.70 ms$^{-1}$	1	0	66.0377	0.18	10	Bench press	183.7	73.7	32	1	2	13
High pre-set velocity loss	3	Bench press: 0.53 ms$^{-1}$; Squat: 0.70 ms$^{-1}$	2	1	58.4906	0.22	7	Bench press	183.7	73.7	32	1	2	13
High pre-set velocity loss	3	Bench press: 0.53 ms$^{-1}$; Squat: 0.70 ms$^{-1}$	3	0	83.0189	0.09	8	Bench press	183.7	73.7	32	1	2	13
High pre-set velocity loss	4	Bench press: 0.45 ms$^{-1}$; Squat: 0.60 ms$^{-1}$	1	0	67.3913	0.15	7	Bench press	183.7	73.7	32	1	2	13
High pre-set velocity loss	4	Bench press: 0.45 ms$^{-1}$; Squat: 0.60 ms$^{-1}$	2	1	43.4783	0.26	5	Bench press	183.7	73.7	32	1	2	13
High pre-set velocity loss	4	Bench press: 0.45 ms$^{-1}$; Squat: 0.60 ms$^{-1}$	3	0	52.1739	0.22	6	Bench press	183.7	73.7	32	1	2	13
High pre-set velocity loss	4	Bench press: 0.38 ms$^{-1}$; Squat: 0.49 ms$^{-1}$	1	0	65.7143	0.12	6	Bench press	183.7	73.7	32	1	2	13
High pre-set velocity loss	4	Bench press: 0.38 ms$^{-1}$; Squat: 0.49 ms$^{-1}$	2	1	48.5714	0.18	3	Bench press	183.7	73.7	32	1	2	13
High pre-set velocity loss	4	Bench press: 0.38 ms$^{-1}$; Squat: 0.49 ms$^{-1}$	3	2	31.4286	0.24	3	Bench press	183.7	73.7	32	1	2	13
High pre-set velocity loss	4	Bench press: 0.53 ms$^{-1}$; Squat: 0.70 ms$^{-1}$	1	1	56.8627	0.22	9	Bench press	183.7	73.7	32	1	2	13
High pre-set velocity loss	4	Bench press: 0.53 ms$^{-1}$; Squat: 0.70 ms$^{-1}$	2	0	66.6667	0.17	10	Bench press	183.7	73.7	32	1	2	13
High pre-set velocity loss	4	Bench press: 0.53 ms$^{-1}$; Squat: 0.70 ms$^{-1}$	3	0	68.6275	0.16	9	Bench press	183.7	73.7	32	1	2	13
High pre-set velocity loss	5	Bench press: 0.45 ms$^{-1}$; Squat: 0.60 ms$^{-1}$	1	0	67.3913	0.15	7	Bench press	183.7	73.7	32	1	2	13
High pre-set velocity loss	5	Bench press: 0.45 ms$^{-1}$; Squat: 0.60 ms$^{-1}$	2	0	78.2609	0.1	6	Bench press	183.7	73.7	32	1	2	13
High pre-set velocity loss	5	Bench press: 0.45 ms$^{-1}$; Squat: 0.60 ms$^{-1}$	3	0	65.2174	0.16	4	Bench press	183.7	73.7	32	1	2	13
High pre-set velocity loss	5	Bench press: 0.45 ms$^{-1}$; Squat: 0.60 ms$^{-1}$	4	0	54.902	0.23	3	Bench press	183.7	73.7	32	1	2	13
High pre-set velocity loss	5	Bench press: 0.38 ms$^{-1}$; Squat: 0.49 ms$^{-1}$	1	1	60.9756	0.16	5	Bench press	183.7	73.7	32	1	2	13
High pre-set velocity loss	5	Bench press: 0.38 ms$^{-1}$; Squat: 0.49 ms$^{-1}$	2	1	63.4146	0.15	6	Bench press	183.7	73.7	32	1	2	13
High pre-set velocity loss	5	Bench press: 0.38 ms$^{-1}$; Squat: 0.49 ms$^{-1}$	3	0	75.6098	0.1	6	Bench press	183.7	73.7	32	1	2	13
High pre-set velocity loss	5	Bench press: 0.38 ms$^{-1}$; Squat: 0.49 ms$^{-1}$	4	0	50	0.23	4	Bench press	183.7	73.7	32	1	2	13
High pre-set velocity loss	5	Bench press: 0.53 ms$^{-1}$; Squat: 0.70 ms$^{-1}$	1	2	57.1429	0.24	7	Bench press	183.7	73.7	32	1	2	13
High pre-set velocity loss	5	Bench press: 0.53 ms$^{-1}$; Squat: 0.70 ms$^{-1}$	2	1	73.2143	0.15	7	Bench press	183.7	73.7	32	1	2	13
High pre-set velocity loss	5	Bench press: 0.53 ms$^{-1}$; Squat: 0.70 ms$^{-1}$	3	1	67.8571	0.18	7	Bench press	183.7	73.7	32	1	2	13
High pre-set velocity loss	5	Bench press: 0.53 ms$^{-1}$; Squat: 0.70 ms$^{-1}$	4	2	26.8293	0.3	5	Bench press	183.7	73.7	32	1	2	13
High pre-set velocity loss	6	Bench press: 0.45 ms$^{-1}$; Squat: 0.60 ms$^{-1}$	1	0	72.093	0.12	7	Bench press	183.7	73.7	32	1	2	13
High pre-set velocity loss	6	Bench press: 0.45 ms$^{-1}$; Squat: 0.60 ms$^{-1}$	2	0	58.1395	0.18	5	Bench press	183.7	73.7	32	1	2	13
High pre-set velocity loss	6	Bench press: 0.45 ms$^{-1}$; Squat: 0.60 ms$^{-1}$	3	0	65.1163	0.15	5	Bench press	183.7	73.7	32	1	2	13
High pre-set velocity loss	6	Bench press: 0.45 ms$^{-1}$; Squat: 0.60 ms$^{-1}$	4	2	51.7857	0.27	3	Bench press	183.7	73.7	32	1	2	13
High pre-set velocity loss	6	Bench press: 0.38 ms$^{-1}$; Squat: 0.49 ms$^{-1}$	2	0	60	0.14	3	Bench press	183.7	73.7	32	1	2	13
High pre-set velocity loss	6	Bench press: 0.38 ms$^{-1}$; Squat: 0.49 ms$^{-1}$	3	0	65.7143	0.12	3	Bench press	183.7	73.7	32	1	2	13
High pre-set velocity loss	6	Bench press: 0.38 ms$^{-1}$; Squat: 0.49 ms$^{-1}$	4	0	65.1163	0.15	3	Bench press	183.7	73.7	32	1	2	13
Low pre-set velocity loss	1	Bench press: 0.38 ms$^{-1}$; Squat: 0.49 ms$^{-1}$	1	3	37.7358	0.41	4	Squat	183.7	73.7	32	1	1	13
Low pre-set velocity loss	1	Bench press: 0.38 ms$^{-1}$; Squat: 0.49 ms$^{-1}$	2	4	22.6415	0.41	5	Squat	183.7	73.7	32	1	1	13
Low pre-set velocity loss	1	Bench press: 0.53 ms$^{-1}$; Squat: 0.70 ms$^{-1}$	1	4	19.1781	0.57	6	Squat	183.7	73.7	32	1	1	13
Low pre-set velocity loss	1	Bench press: 0.53 ms$^{-1}$; Squat: 0.70 ms$^{-1}$	2	4	21.9178	0.59	6	Squat	183.7	73.7	32	1	1	13
Low pre-set velocity loss	2	Bench press: 0.38 ms$^{-1}$; Squat: 0.49 ms$^{-1}$	1	4	24	0.4	4	Squat	183.7	73.7	32	1	1	13
Low pre-set velocity loss	2	Bench press: 0.38 ms$^{-1}$; Squat: 0.49 ms$^{-1}$	2	3	20	0.42	3	Squat	183.7	73.7	32	1	1	13
Low pre-set velocity loss	3	Bench press: 0.45 ms$^{-1}$; Squat: 0.60 ms$^{-1}$	1	3	28.5714	0.5	4	Squat	183.7	73.7	32	1	1	13
Low pre-set velocity loss	3	Bench press: 0.45 ms$^{-1}$; Squat: 0.60 ms$^{-1}$	2	2	20.6349	0.49	3	Squat	183.7	73.7	32	1	1	13
Low pre-set velocity loss	3	Bench press: 0.45 ms$^{-1}$; Squat: 0.60 ms$^{-1}$	3	4	22.2222	0.47	3	Squat	183.7	73.7	32	1	1	13
Low pre-set velocity loss	3	Bench press: 0.45 ms$^{-1}$; Squat: 0.60 ms$^{-1}$	4	3	25.3968	0.46	3	Squat	183.7	73.7	32	1	1	13
Low pre-set velocity loss	3	Bench press: 0.38 ms$^{-1}$; Squat: 0.49 ms$^{-1}$	1	3	18.3673	0.39	2	Squat	183.7	73.7	32	1	1	13
Low pre-set velocity loss	3	Bench press: 0.38 ms$^{-1}$; Squat: 0.49 ms$^{-1}$	2	2	20.4082	0.38	2	Squat	183.7	73.7	32	1	1	13
Low pre-set velocity loss	3	Bench press: 0.38 ms$^{-1}$; Squat: 0.49 ms$^{-1}$	3	3	22.449	0.4	2	Squat	183.7	73.7	32	1	1	13
Low pre-set velocity loss	3	Bench press: 0.38 ms$^{-1}$; Squat: 0.49 ms$^{-1}$	4	4	18.3673	0.38	2	Squat	183.7	73.7	32	1	1	13
Low pre-set velocity loss	3	Bench press: 0.38 ms$^{-1}$; Squat: 0.49 ms$^{-1}$	5	2	22.449	0.34	2	Squat	183.7	73.7	32	1	1	13
Low pre-set velocity loss	3	Bench press: 0.38 ms$^{-1}$; Squat: 0.49 ms$^{-1}$	6	2	30.6122	0.33	2	Squat	183.7	73.7	32	1	1	13
Low pre-set velocity loss	3	Bench press: 0.38 ms$^{-1}$; Squat: 0.49 ms$^{-1}$	7	2	32.6531	0.33	2	Squat	183.7	73.7	32	1	1	13
Low pre-set velocity loss	4	Bench press: 0.53 ms$^{-1}$; Squat: 0.70 ms$^{-1}$	1	3	9.45946	0.57	16	Squat	183.7	73.7	32	1	1	13
Low pre-set velocity loss	5	Bench press: 0.45 ms$^{-1}$; Squat: 0.60 ms$^{-1}$	1	3	33.871	0.5	6	Squat	183.7	73.7	32	1	1	13
Low pre-set velocity loss	5	Bench press: 0.45 ms$^{-1}$; Squat: 0.60 ms$^{-1}$	2	4	19.3548	0.5	3	Squat	183.7	73.7	32	1	1	13
Low pre-set velocity loss	5	Bench press: 0.45 ms$^{-1}$; Squat: 0.60 ms$^{-1}$	3	3	19.3548	0.44	4	Squat	183.7	73.7	32	1	1	13
Low pre-set velocity loss	5	Bench press: 0.45 ms$^{-1}$; Squat: 0.60 ms$^{-1}$	4	3	29.0323	0.53	5	Squat	183.7	73.7	32	1	1	13
Low pre-set velocity loss	5	Bench press: 0.38 ms$^{-1}$; Squat: 0.49 ms$^{-1}$	1	2	34.0426	0.32	2	Squat	183.7	73.7	32	1	1	13
Low pre-set velocity loss	5	Bench press: 0.38 ms$^{-1}$; Squat: 0.49 ms$^{-1}$	2	1	31.9149	0.38	2	Squat	183.7	73.7	32	1	1	13
Low pre-set velocity loss	5	Bench press: 0.38 ms$^{-1}$; Squat: 0.49 ms$^{-1}$	3	3	19.1489	0.29	1	Squat	183.7	73.7	32	1	1	13
Low pre-set velocity loss	5	Bench press: 0.38 ms$^{-1}$; Squat: 0.49 ms$^{-1}$	4	1	38.2979	0.33	1	Squat	183.7	73.7	32	1	1	13
Low pre-set velocity loss	5	Bench press: 0.38 ms$^{-1}$; Squat: 0.49 ms$^{-1}$	5	1	29.7872	0.34	2	Squat	183.7	73.7	32	1	1	13
Low pre-set velocity loss	5	Bench press: 0.38 ms$^{-1}$; Squat: 0.49 ms$^{-1}$	6	1	27.6596	0.31	3	Squat	183.7	73.7	32	1	1	13
Low pre-set velocity loss	5	Bench press: 0.38 ms$^{-1}$; Squat: 0.49 ms$^{-1}$	7	1	34.0426	0.38	3	Squat	183.7	73.7	32	1	1	13
Low pre-set velocity loss	5	Bench press: 0.53 ms$^{-1}$; Squat: 0.70 ms$^{-1}$	2	4	18.0556	0.59	5	Squat	183.7	73.7	32	1	1	13
Low pre-set velocity loss	5	Bench press: 0.53 ms$^{-1}$; Squat: 0.70 ms$^{-1}$	3	3	18.0556	0.57	4	Squat	183.7	73.7	32	1	1	13
Low pre-set velocity loss	5	Bench press: 0.53 ms$^{-1}$; Squat: 0.70 ms$^{-1}$	7	4	20.8333	0.58	3	Squat	183.7	73.7	32	1	1	13
Low pre-set velocity loss	6	Bench press: 0.45 ms$^{-1}$; Squat: 0.60 ms$^{-1}$	1	4	18.6441	0.47	3	Squat	183.7	73.7	32	1	1	13
Low pre-set velocity loss	6	Bench press: 0.45 ms$^{-1}$; Squat: 0.60 ms$^{-1}$	2	3	20.339	0.43	3	Squat	183.7	73.7	32	1	1	13
Low pre-set velocity loss	6	Bench press: 0.45 ms$^{-1}$; Squat: 0.60 ms$^{-1}$	3	4	27.1186	0.45	3	Squat	183.7	73.7	32	1	1	13
Low pre-set velocity loss	6	Bench press: 0.45 ms$^{-1}$; Squat: 0.60 ms$^{-1}$	4	4	23.7288	0.46	3	Squat	183.7	73.7	32	1	1	13
Low pre-set velocity loss	6	Bench press: 0.45 ms$^{-1}$; Squat: 0.60 ms$^{-1}$	5	3	22.0339	0.48	2	Squat	183.7	73.7	32	1	1	13
Low pre-set velocity loss	6	Bench press: 0.45 ms$^{-1}$; Squat: 0.60 ms$^{-1}$	6	2	18.6441	0.47	2	Squat	183.7	73.7	32	1	1	13
Low pre-set velocity loss	6	Bench press: 0.45 ms$^{-1}$; Squat: 0.60 ms$^{-1}$	7	2	20.339	0.44	2	Squat	183.7	73.7	32	1	1	13
Low pre-set velocity loss	6	Bench press: 0.38 ms$^{-1}$; Squat: 0.49 ms$^{-1}$	1	3	41.1765	0.32	3	Squat	183.7	73.7	32	1	1	13
Low pre-set velocity loss	6	Bench press: 0.38 ms$^{-1}$; Squat: 0.49 ms$^{-1}$	2	2	37.2549	0.44	3	Squat	183.7	73.7	32	1	1	13
Low pre-set velocity loss	6	Bench press: 0.38 ms$^{-1}$; Squat: 0.49 ms$^{-1}$	3	3	13.7255	0.44	2	Squat	183.7	73.7	32	1	1	13
Low pre-set velocity loss	6	Bench press: 0.38 ms$^{-1}$; Squat: 0.49 ms$^{-1}$	4	2	13.7255	0.23	2	Squat	183.7	73.7	32	1	1	13
Low pre-set velocity loss	6	Bench press: 0.38 ms$^{-1}$; Squat: 0.49 ms$^{-1}$	5	1	54.902	0.48	2	Squat	183.7	73.7	32	1	1	13
Low pre-set velocity loss	6	Bench press: 0.53 ms$^{-1}$; Squat: 0.70 ms$^{-1}$	2	3	21.4286	0.53	5	Squat	183.7	73.7	32	1	1	13
Low pre-set velocity loss	6	Bench press: 0.53 ms$^{-1}$; Squat: 0.70 ms$^{-1}$	3	3	24.2857	0.56	4	Squat	183.7	73.7	32	1	1	13
Low pre-set velocity loss	6	Bench press: 0.53 ms$^{-1}$; Squat: 0.70 ms$^{-1}$	4	3	20	0.48	5	Squat	183.7	73.7	32	1	1	13
Low pre-set velocity loss	6	Bench press: 0.53 ms$^{-1}$; Squat: 0.70 ms$^{-1}$	5	2	31.4286	0.61	4	Squat	183.7	73.7	32	1	1	13
Low pre-set velocity loss	6	Bench press: 0.53 ms$^{-1}$; Squat: 0.70 ms$^{-1}$	6	3	12.8571	0.52	3	Squat	183.7	73.7	32	1	1	13
Low pre-set velocity loss	6	Bench press: 0.53 ms$^{-1}$; Squat: 0.70 ms$^{-1}$	7	2	25.7143	0.54	4	Squat	183.7	73.7	32	1	1	13
Low pre-set velocity loss	6	Bench press: 0.53 ms$^{-1}$; Squat: 0.70 ms$^{-1}$	8	3	22.8571	0.6	3	Squat	183.7	73.7	32	1	1	13
High pre-set velocity loss	1	Bench press: 0.45 ms$^{-1}$; Squat: 0.60 ms$^{-1}$	1	4	40	0.42	13	Squat	183.7	73.7	32	1	2	13
High pre-set velocity loss	1	Bench press: 0.45 ms$^{-1}$; Squat: 0.60 ms$^{-1}$	2	3	41.4286	0.41	14	Squat	183.7	73.7	32	1	2	13
High pre-set velocity loss	1	Bench press: 0.38 ms$^{-1}$; Squat: 0.49 ms$^{-1}$	1	2	35.4167	0.31	8	Squat	183.7	73.7	32	1	2	13
High pre-set velocity loss	1	Bench press: 0.38 ms$^{-1}$; Squat: 0.49 ms$^{-1}$	2	1	31.25	0.33	4	Squat	183.7	73.7	32	1	2	13
High pre-set velocity loss	1	Bench press: 0.53 ms$^{-1}$; Squat: 0.70 ms$^{-1}$	2	2	39.726	0.44	17	Squat	183.7	73.7	32	1	2	13
High pre-set velocity loss	2	Bench press: 0.45 ms$^{-1}$; Squat: 0.60 ms$^{-1}$	1	1	49.1228	0.29	6	Squat	183.7	73.7	32	1	2	13
High pre-set velocity loss	2	Bench press: 0.45 ms$^{-1}$; Squat: 0.60 ms$^{-1}$	2	1	45.614	0.31	5	Squat	183.7	73.7	32	1	2	13
High pre-set velocity loss	2	Bench press: 0.45 ms$^{-1}$; Squat: 0.60 ms$^{-1}$	3	1	36.8421	0.36	4	Squat	183.7	73.7	32	1	2	13
High pre-set velocity loss	2	Bench press: 0.38 ms$^{-1}$; Squat: 0.49 ms$^{-1}$	1	1	33.3333	0.32	5	Squat	183.7	73.7	32	1	2	13
High pre-set velocity loss	2	Bench press: 0.38 ms$^{-1}$; Squat: 0.49 ms$^{-1}$	2	0	50	0.24	4	Squat	183.7	73.7	32	1	2	13
High pre-set velocity loss	2	Bench press: 0.38 ms$^{-1}$; Squat: 0.49 ms$^{-1}$	3	0	43.75	0.27	3	Squat	183.7	73.7	32	1	2	13
High pre-set velocity loss	2	Bench press: 0.53 ms$^{-1}$; Squat: 0.70 ms$^{-1}$	1	3	45.5882	0.37	14	Squat	183.7	73.7	32	1	2	13
High pre-set velocity loss	2	Bench press: 0.53 ms$^{-1}$; Squat: 0.70 ms$^{-1}$	2	2	42.6471	0.39	13	Squat	183.7	73.7	32	1	2	13
High pre-set velocity loss	2	Bench press: 0.53 ms$^{-1}$; Squat: 0.70 ms$^{-1}$	3	3	39.7059	0.41	9	Squat	183.7	73.7	32	1	2	13
High pre-set velocity loss	3	Bench press: 0.45 ms$^{-1}$; Squat: 0.60 ms$^{-1}$	1	3	37.0968	0.39	4	Squat	183.7	73.7	32	1	2	13
High pre-set velocity loss	3	Bench press: 0.45 ms$^{-1}$; Squat: 0.60 ms$^{-1}$	2	2	45.1613	0.34	6	Squat	183.7	73.7	32	1	2	13
High pre-set velocity loss	3	Bench press: 0.45 ms$^{-1}$; Squat: 0.60 ms$^{-1}$	3	2	40.3226	0.37	5	Squat	183.7	73.7	32	1	2	13
High pre-set velocity loss	3	Bench press: 0.38 ms$^{-1}$; Squat: 0.49 ms$^{-1}$	1	0	41.3043	0.27	4	Squat	183.7	73.7	32	1	2	13
High pre-set velocity loss	3	Bench press: 0.38 ms$^{-1}$; Squat: 0.49 ms$^{-1}$	2	0	47.8261	0.24	5	Squat	183.7	73.7	32	1	2	13
[truncated: 973 more rows]

## Sheet: 2_runder
id	Female
10	0
13	1
14	0
15	0
